# Supplementary material for: Structure-based development and preclinical evaluation of the SARS-CoV-2 3C-like protease inhibitor simnotrelvir
Source: PubMed Central journal article supplement (PMC10575921; doi:10.1038/s41467-023-42102-y), 2023-10-13
Supplement: 41467_2023_42102_MOESM1_ESM.pdf [file 41467_2023_42102_MOESM1_ESM.pdf]

# Structure-based development and preclinical evaluation of the SARS-CoV-2 3C-like protease inhibitor simnotrelvir

Xiangrui Jiang<sup>1,2,11</sup>, Haixia Su<sup>1,11</sup>, Weijuan Shang<sup>3,11</sup>, Feng Zhou<sup>4,5,11</sup>, Yan Zhang<sup>1,11</sup>, Wenfeng Zhao<sup>1,11</sup>, Qiumeng Zhang<sup>1</sup>, Hang Xie<sup>1,6</sup>, Lei Jiang<sup>5</sup>, Tianqing Nie<sup>1,6</sup>, Feipu Yang<sup>1</sup>, Muya Xiong<sup>1,2</sup>, Xiaoxing Huang<sup>5</sup>, Minjun Li<sup>7</sup>, Ping Chen<sup>8</sup>, Shaoping Peng<sup>4,8</sup>, Gengfu Xiao<sup>3</sup>, Hualiang Jiang<sup>1,12</sup>, Renhong Tang<sup>4,5\*</sup>, Leike Zhang<sup>3,9\*</sup>, Jingshan Shen<sup>1,2\*</sup>, Yechun Xu<sup>1,2,10\*</sup>

<sup>1</sup>State Key Laboratory of Drug Research, Shanghai Institute of Materia Medica, Chinese Academy of Sciences, Shanghai 201203, China

<sup>2</sup>University of Chinese Academy of Sciences, Beijing 100049, China

<sup>3</sup>State Key Laboratory of Virology, Wuhan Institute of Virology, Center for Biosafety Mega-Science, Chinese Academy of Sciences, Wuhan 430071, China

<sup>4</sup>State Key Laboratory of Neurology and Oncology Drug Development, Nanjing 210023, China

<sup>5</sup>Simcere Zaiming Pharmaceutical Co., Ltd., Shanghai 200000, China

<sup>6</sup>School of Chinese Materia Medica, Nanjing University of Chinese Medicine, Nanjing 210023, China

<sup>7</sup>Shanghai Synchrotron Radiation Facility, Shanghai Advanced Research Institute, Chinese Academy of Sciences, Shanghai 201210, China

<sup>8</sup>Jiangsu Simcere Pharmaceutical Co., Ltd, Nanjing 210023, China

<sup>9</sup>Hubei jiangxia Laboratory, Wuhan 430200, China

<sup>10</sup>School of Pharmaceutical Science and Technology, Hangzhou Institute for Advanced Study, University of Chinese Academy of Sciences, Hangzhou 310024, China

<sup>11</sup>These authors contributed equally

<sup>12</sup>Deceased

\*Correspondence: renhong.tang@simceregroupp.com; zhangleike@wh.iov.cn; shenjingshan@simm.ac.cn; ycxu@simm.ac.cn

## Table of Contents

|                                              | <b>Initial page</b> |
|----------------------------------------------|---------------------|
| <b>Supplementary Figures</b>                 | <b>3</b>            |
| <b>Supplementary Tables</b>                  | <b>22</b>           |
| <b>Spectral Data for Synthetic Compounds</b> | <b>29</b>           |

## S1: Supplementary Figures

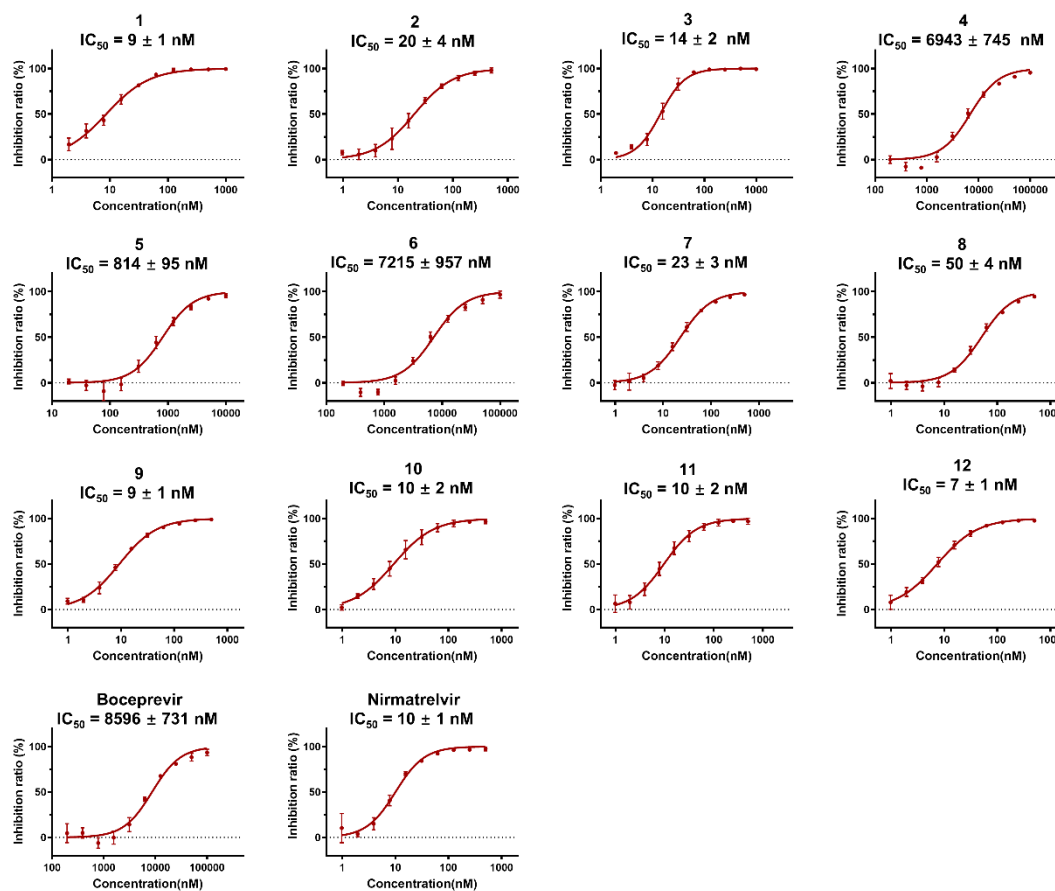

**Supplementary Fig. 1 | Concentration-dependent inhibition of SARS-CoV-2 3CL<sup>pro</sup> by compounds.** Inhibition curves for compounds 1-12, boceprevir and nirmatrelvir against SARS-CoV-2 3CL<sup>pro</sup> resulted from the FRET-based enzymatic assays. Error bars represent mean ± SD of three independent experiments. Source data are provided as a Source Data file.

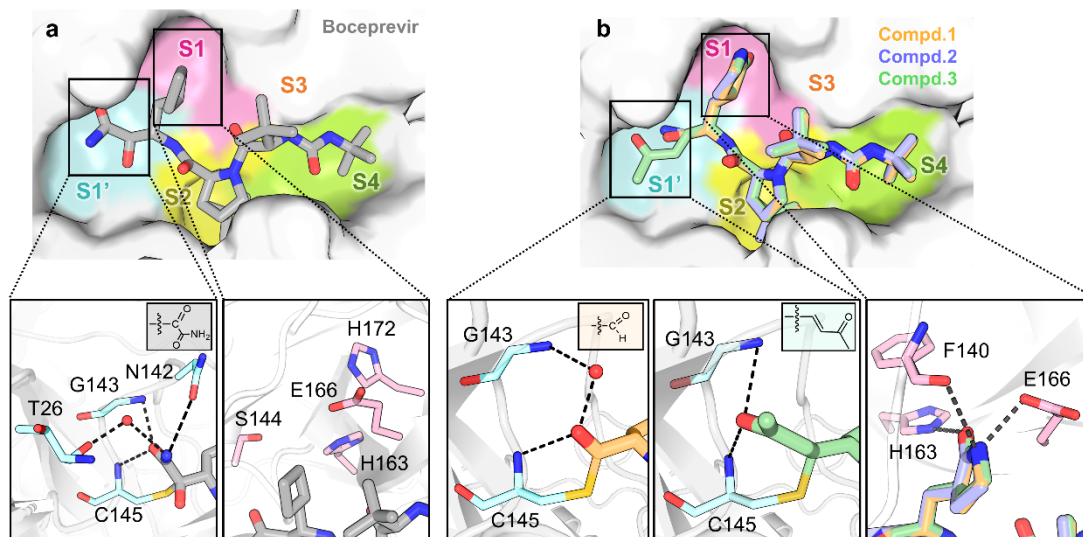

**Supplementary Fig. 2 | Binding modes of boceprevir (a) and compounds 1-3 (b) with SARS-CoV-2 3CL<sup>pro</sup> revealed by X-ray crystal structures.** Molecular surface representations of SARS-CoV-2 3CL<sup>pro</sup> in complex with boceprevir (PDB code: 6XQU), compounds **1** (PDB code: 8IFP), **2** (PDB code: 8IFQ) and **3** (PDB code: 8IFR). The S1'-S4 subsites are colored in cyan, magenta, yellow, orange, and green, respectively. Boceprevir and compounds **1-3** are shown as gray, orange, purple, and green sticks, respectively. H-bonds are represented by black dashed lines.

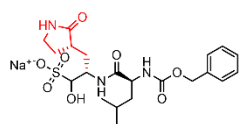

GC376

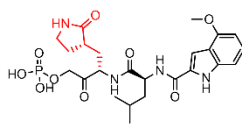

Lufotrelvir  
(PF-07304814)

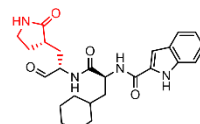

Bofutrelvir  
(FB2001)

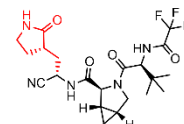

Nirmatrelvir

**Supplementary Fig. 3 | Chemical structures of GC376, lufotrelvir, bofutrelvir, and nirmatrelvir.**

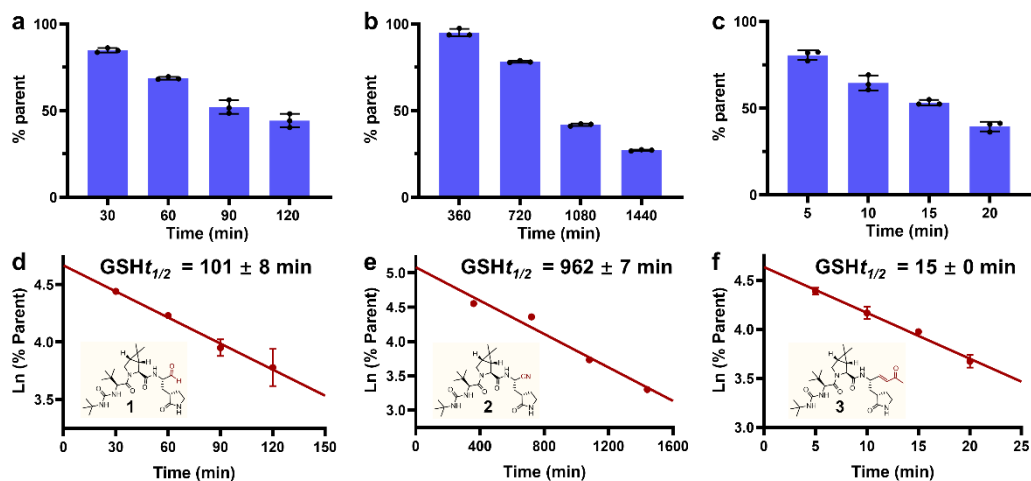

**Supplementary Fig. 4 | Half-life time determination of compounds 1-3 reacting with GSH. a, b, c,** The remaining GSH after incubation with compounds **1** (**a**), **2** (**b**) and **3** (**c**) for indicated time. **d, e, f,** Ln (the percentage of the remaining GSH) are plotted against incubation time to generate the half-life time of compounds **1** (**d**), **2** (**e**), and **3** (**f**) reacting with GSH. Error bars represent mean  $\pm$  SD of three independent experiments. Source data are provided as a Source Data file.

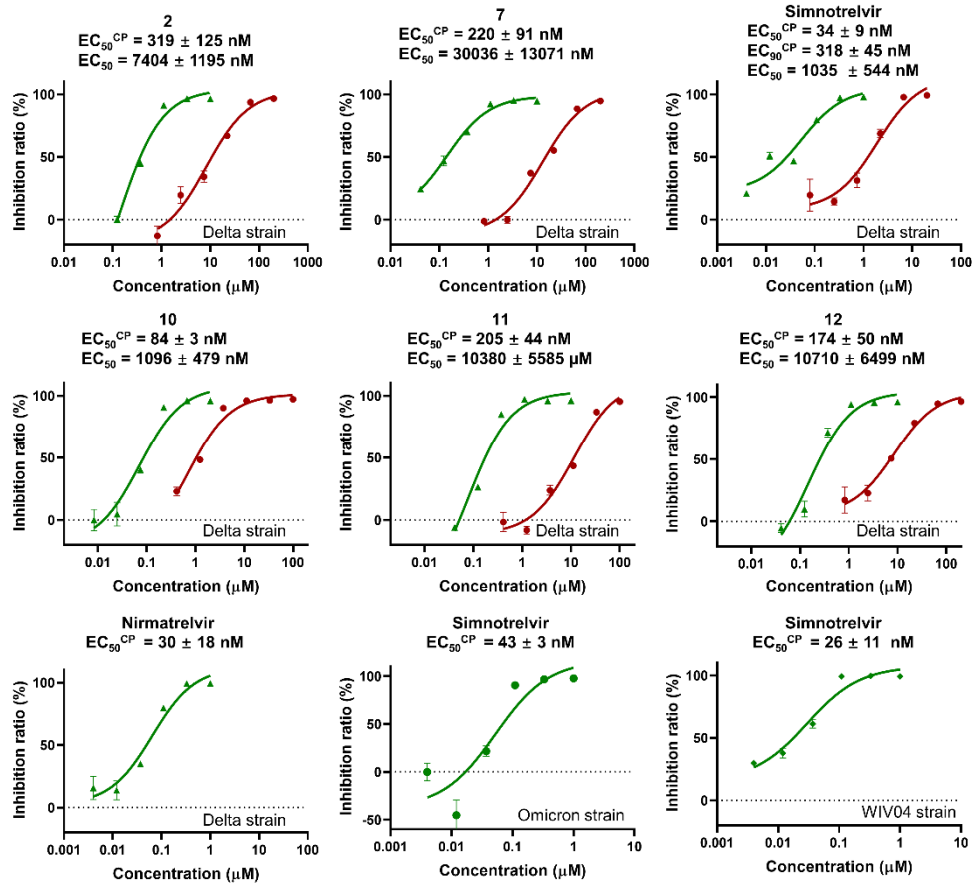

**Supplementary Fig. 5 | *In vitro* cellular antiviral activity of compounds.**

Representative inhibition curves for compounds **2**, **7**, **10-12**, simnotrelvir, and nirmatrelvir against SARS-CoV-2 WIV04, Delta and Omicron strains in Vero E6 cells. The  $EC_{50}^{CP}$  means the  $EC_{50}$  value measured in the presence of 0.5 μM P-glycoprotein efflux inhibitor CP-100356. Error bars represent mean ± SD. At least three independent experiments were performed. Source data are provided as a Source Data file.

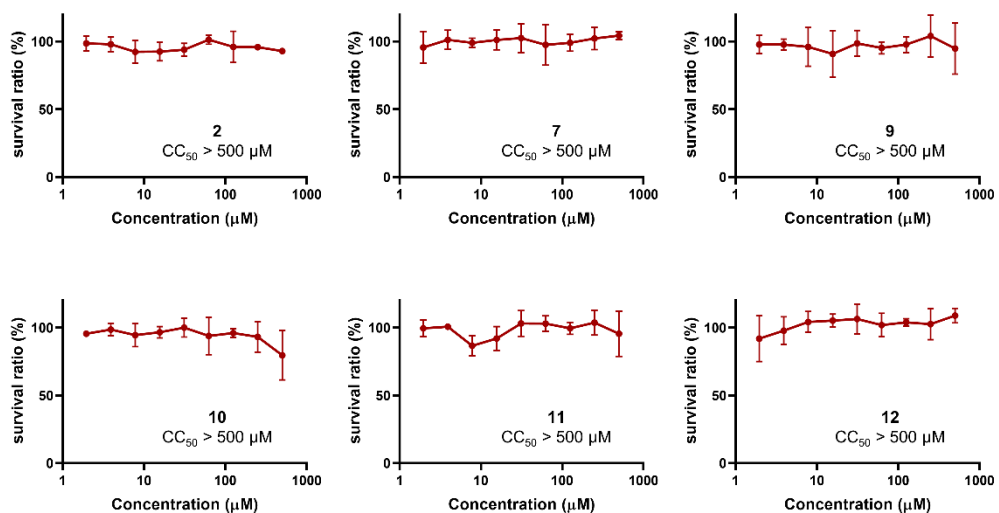

**Supplementary Fig. 6 | Cytotoxicities of compounds 2, 7, and 9-12 in Vero E6 cells.** Error bars represent mean  $\pm$  SD of three independent experiments. Source data are provided as a Source Data file.



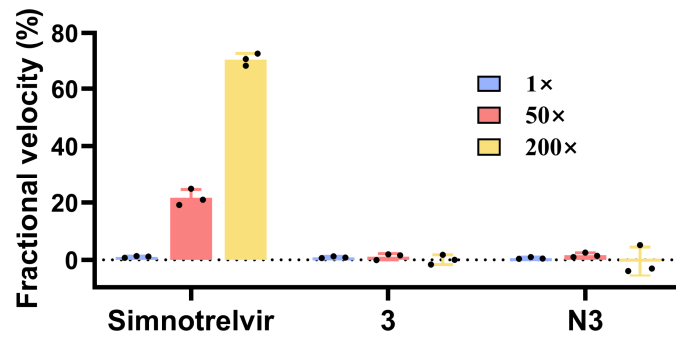

**Supplementary Fig. 7 | Reversibility evaluation of SARS-CoV-2 3CL<sup>pro</sup>-inhibitor complexes.** The ratios of fractional velocity after 1-fold, 50-fold and 200-fold dilution are colored in blue, salmon and yellow, respectively. Error bars represent mean  $\pm$  SD of three independent experiments. Source data are provided as a Source Data file.

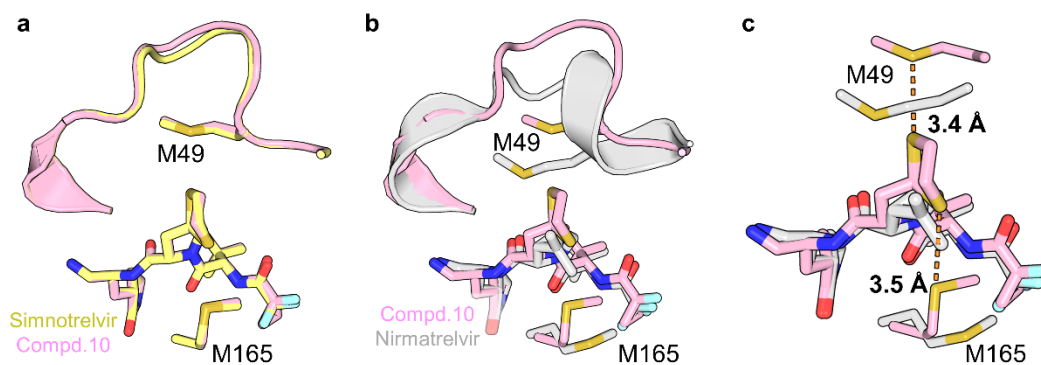

**Supplementary Fig. 8 | Comparison of binding modes of compounds 10, simnotrelvir and nirmatrelvir with SARS-CoV-2 3CL<sup>pro</sup>.** **a**, The overlap of binding poses of simnotrelvir (yellow sticks) and compound 10 (pink sticks) by superimposing crystal structures of SARS-CoV-2 3CL<sup>pro</sup> in complex with two inhibitors. **b**, **c**, The overlap of binding poses of compound 10 (pink sticks) and nirmatrelvir (white sticks). Residues 40-51 of SARS-CoV-2 3CL<sup>pro</sup> are shown as cartoons. The distances are represented by orange dashed lines.

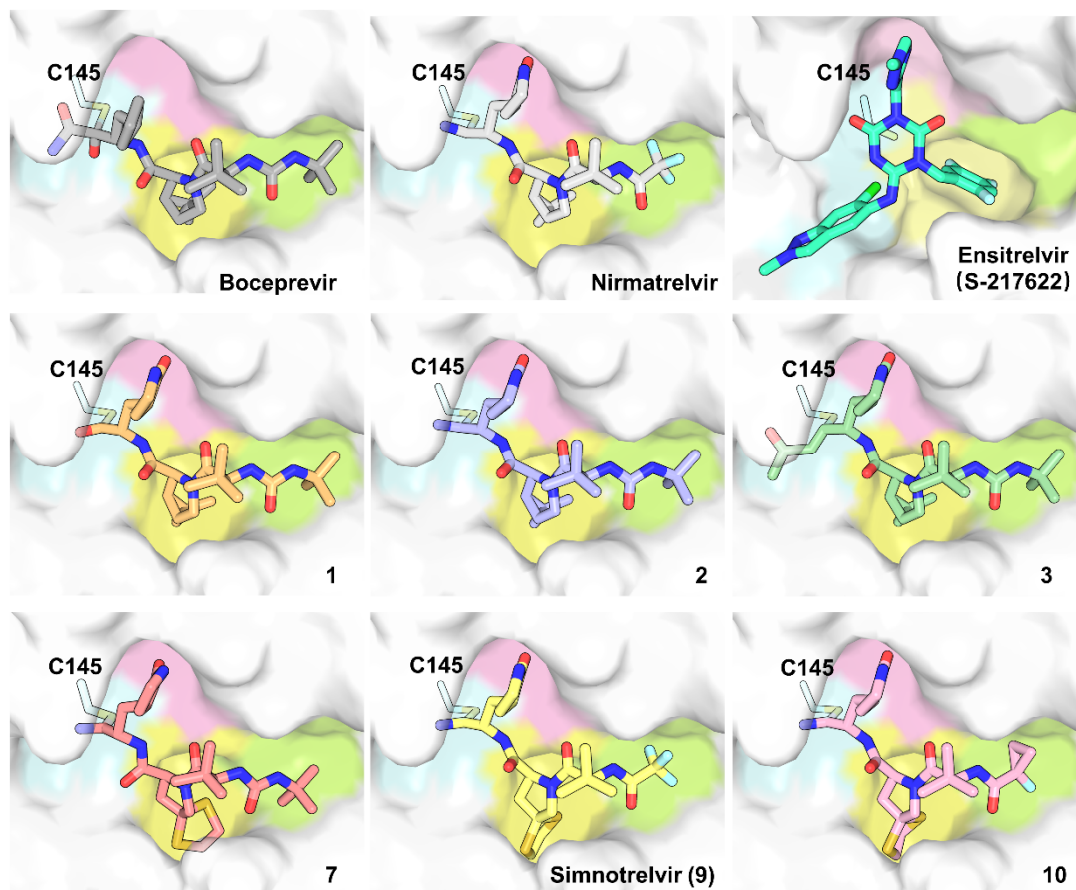

**Supplementary Fig. 9 | Molecular surface representations of SARS-CoV-2 3CL<sup>pro</sup> in complex with boceprevir, nirmatrelvir, ensitrelvir, simnotrelvir, and compounds 1, 2, 3, 7, and 10 in the co-crystal structures. The compounds are shown as sticks with different colors.**

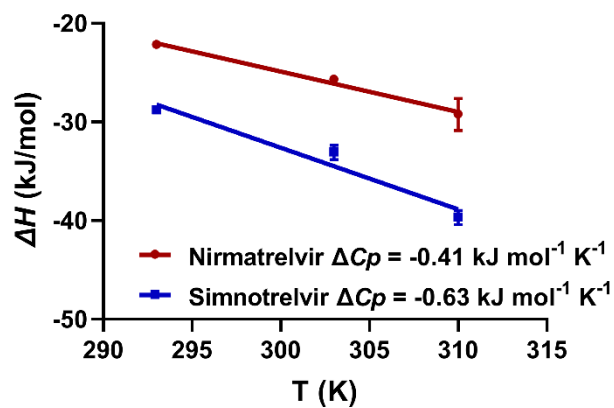

**Supplementary Fig. 10 | Temperature dependence of the measured enthalpy ( $\Delta H$ ) of SARS-CoV-2 3CL<sup>pro</sup> binding to nirmatrelvir (red) and simnotrelvir (blue).** Three independent experiments were performed at each temperature. Source data are provided as a Source Data file.

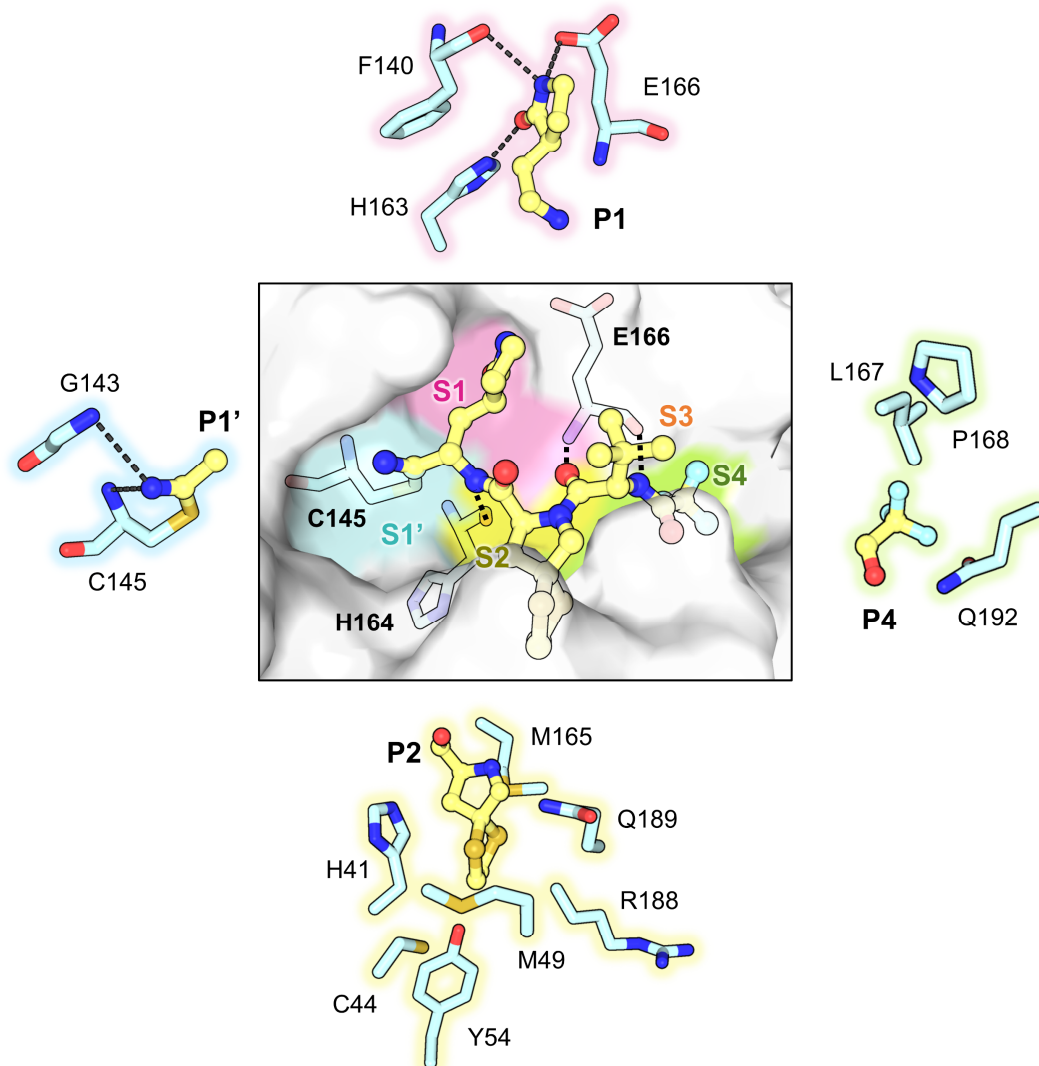

**Supplementary Fig. 11 | Detailed interactions of simnotrelvir with SARS-CoV-2 3CL<sup>pro</sup> revealed by the co-crystal structure.** The protease is represented by molecular surface. The S1'-S4 subsites are colored in cyan, magenta, yellow, orange, and green, respectively. Simnotrelvir is represented as yellow ball and sticks. The residues interacting with simnotrelvir are shown as cyan sticks. H-bonds are displayed by black dashed lines.

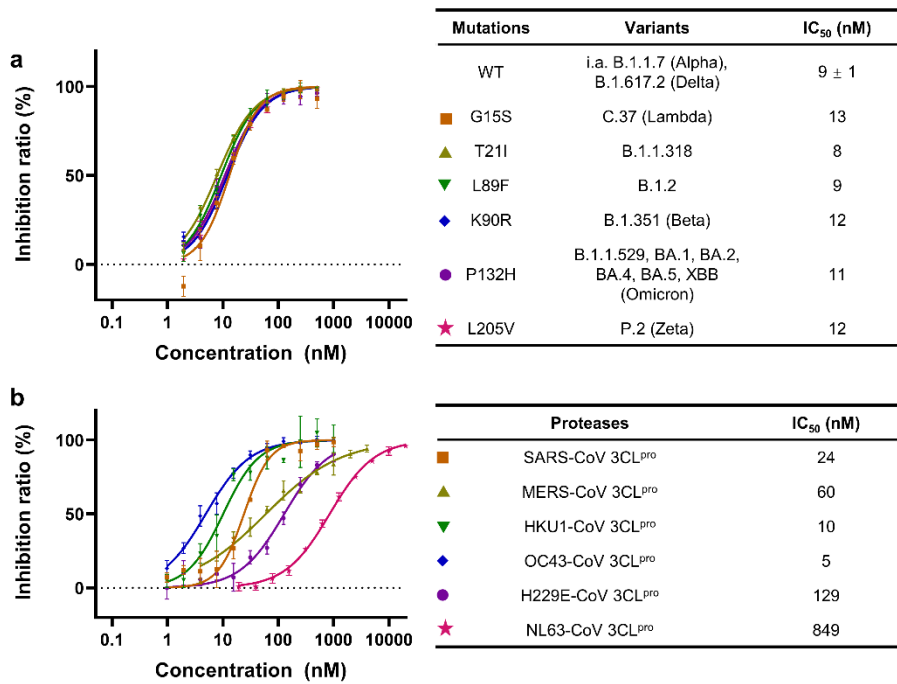

**Supplementary Fig. 12 | Concentration-dependent inhibition of 3CL<sup>pro</sup> of six SARS-CoV-2 variants (a) and six human coronaviruses (b) by simnotrelvir resulted from the FRET-based enzymatic assays.** Error bars were graphed as mean ± SD of triplicate. Source data are provided as a Source Data file.

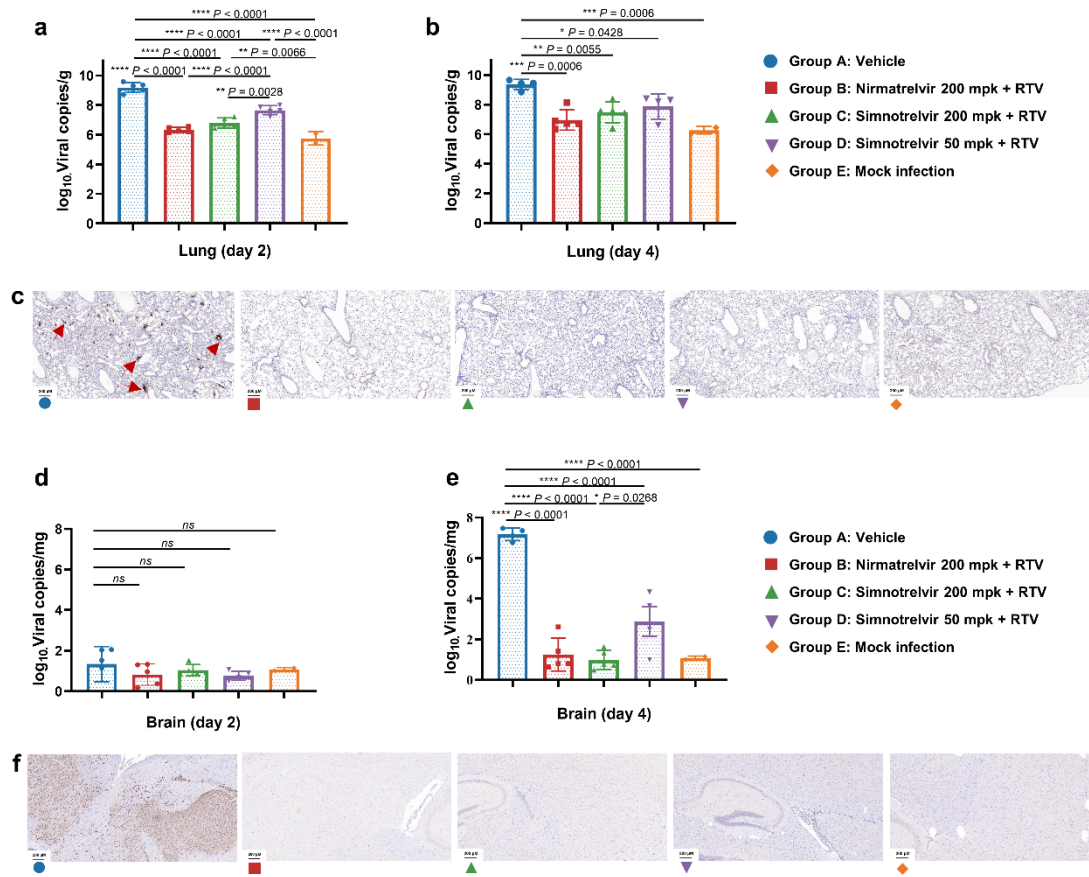

**Supplementary Fig. 13 | *In vivo* antiviral activity of simnotrelvir in K18-hACE2 mice infected by SARS-CoV-2 Delta.** **a**, The virus copy number in lungs at Day 2 post infection (n = 5, 5, 5, 5, and 2 for group A-E). **b**, The virus copy number in lungs at Day 4 post infection (n = 4, 5, 5, 4, and 2 for group A-E). **c**, Immunohistochemistry (IHC) analysis in lungs at Day 2 post infection by using an anti-SARS-CoV-2 nucleocapsid protein antibody **a**, The virus copy number in lungs at Day 2 post infection (n = 5, 5, 5, 5, and 2 for group A-E). Red arrows represent the stained virus nucleocapsid protein. **d**, Virus copy number in mice brains at Day 2 post infection (n = 5, 5, 5, 5, and 2 for group A-E). **e**, Virus copy number in mice brains at Day 4 post infection (n = 4, 5, 5, 4, and 2 for group A-E). **f**, IHC analysis of virus nucleocapsid protein in brains at Day 4 post infection (n = 4, 5, 5, 4, and 2 for group A-E). RTV represents ritonavir (50 mg/kg). The results of virus copy numbers were plotted as the mean ± SD. The scale bars for IHC staining represent 200 μm. Statistical analysis was performed by one-way ANOVA. \*p<0.05, \*\*p<0.01, and \*\*\*p< 0.001. Source data are provided as a Source Data file.

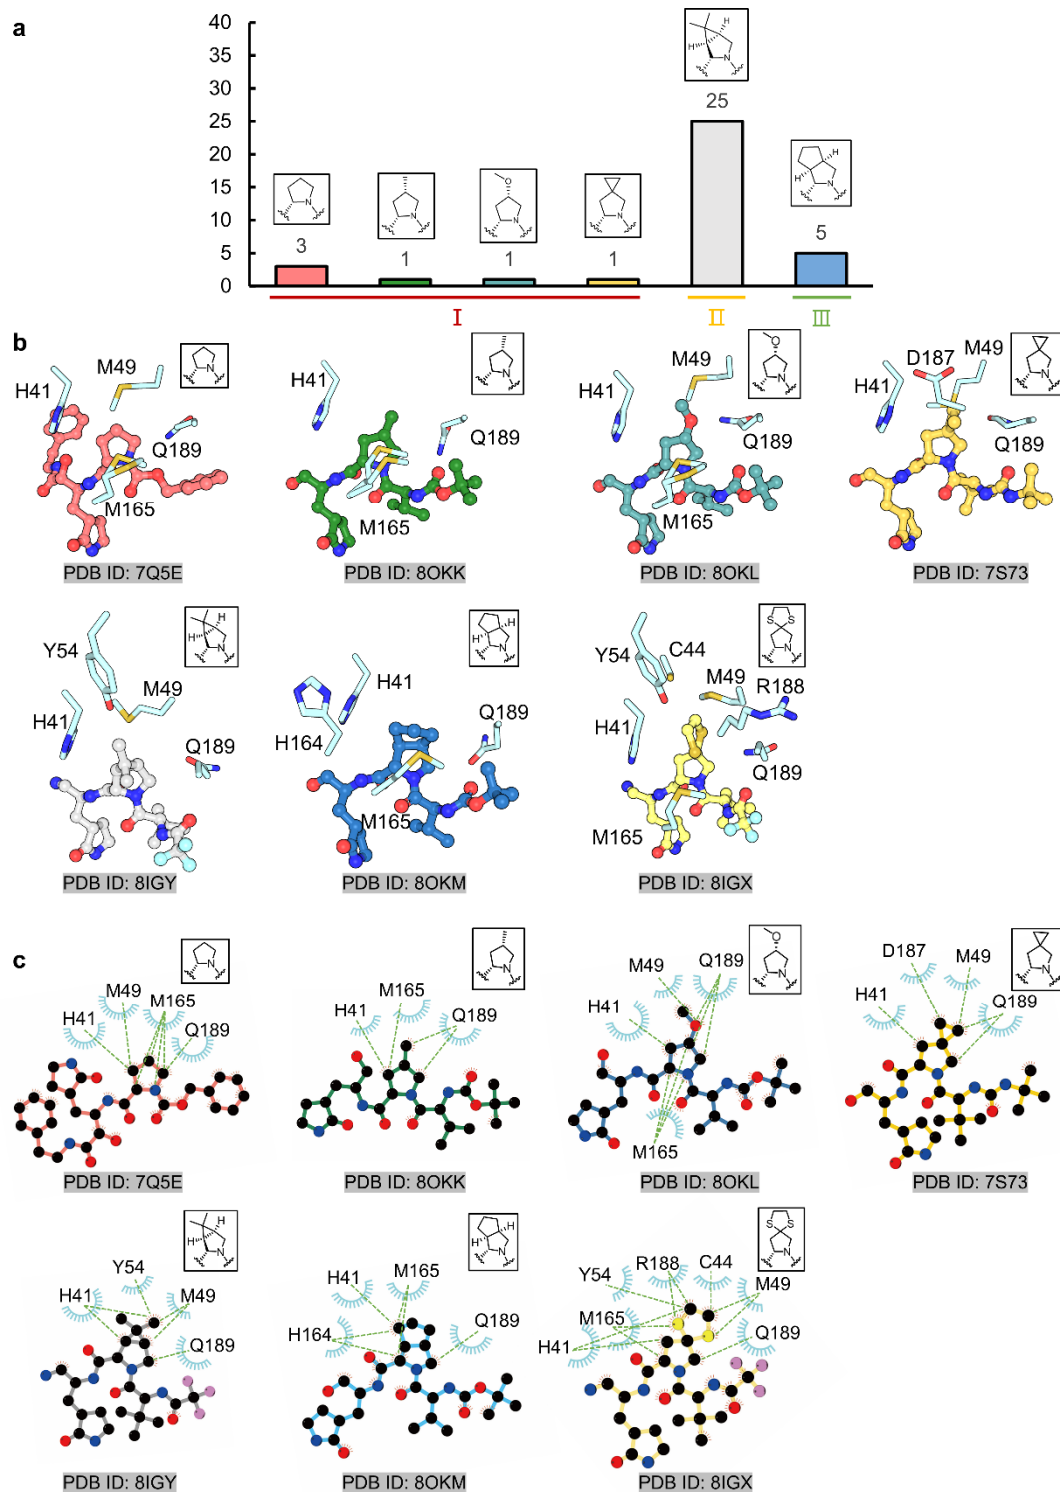

**Supplementary Fig. 14 | The cyclic P2 segments of SARS-CoV-2 3CL<sup>pro</sup> peptidomimetic inhibitors and their binding modes with SARS-CoV-2 3CL<sup>pro</sup>.** a, Classification of P2 segments of peptidomimetic inhibitors by analysis of 161 structures of the SARS-CoV-2 3CL<sup>pro</sup> in complex with peptidomimetic inhibitors available in Protein Data Bank on June 3, 2023 (PDB codes: 7Q5E, 7Q5F, 8OKN, 8OKK, 8OKL,



7S73, 7EF3, 7SFB, 7SFH, 7SFI, 7S6W, 7S6Y, 7S70, 7S71, 7S72, 7S75, 7SF1, 7RFR, 7RFS, 7RFU, 6XQT, 7S6Z, 7SDC, 7TDU, 7TEH, 7TFR, 8B2T, 6WNP, 7LYI, 8DOX, 8DPR, 8OKM, 8IGN, 6XQS, 7D3I, 7LYH, 7RVP, 7JPZ, 7MAT, 7JQ1, 7JQ4, 7MAU, 7MAV, 7MB0, 7MB1, 7MB2, 7MB3, 6M0K, 7L8I, 7MAX, 7MAZ, 7RVU, 7RVV, 7SD9, 7SDA, 7RVM, 7RVO, 7RVQ, 7RVR, 7RVT, 7S74, 7RVS, 7RVX, 7UUC, 7VVP, 6Y2F, 7LCO, 7TIA, 7MAW, 8HHU, 7SH7, 7SH9, 7RVW, 7RVY, 7RW0, 7C8T, 7TJ0, 6LZE, 7SH8, 7JQ2, 7TIV, 7SGH, 7RVZ, 7R7H, 7RVN, 7RW1, 7WO1, 7WO2, 7WO3, 7WOH, 6WTJ, 6XMK, 7DGI, 7E19, 7TIW, 7TIX, 7TIZ, 7TQ2, 7TQ3, 7TQ4, 7TQ5, 7TQ6, 7XRS, 8CZW, 8CZX, 7BE7, 7DGH, 7T4A, 7T4B, 7T42, 7T43, 7T44, 7T45, 7T46, 7T48, 7T49, 7XAR, 8DD9, 7LZU, 7LZV, 7LZX, 7LZY, 7M01, 7M02, 7M03, 7M04, 6WTK, 6XHM, 6XR3, 7C8R, 7JP0, 7JQ0, 7JQ3, 7K0F, 7LCR, 7LCT, 7LDL, 7LKR, 7LKS, 7LKT, 7LKV, 7LKW, 7LKX, 7M00, 7TIU, 7TIY, 8DZB, 8E5X, 8E5Z, 8E6A, 8E61, 8F44, 8F45, 8F46, 8DOY, 7LZT, 7LZZ, 7MBI, 7ZQV, 7DGF, and 7WOF).

**b, c**, Hydrophobic interactions between the cyclic P2 segments of peptidomimetic inhibitors and the S2 subsite residues of SARS-CoV-2 3CL<sup>pro</sup>.

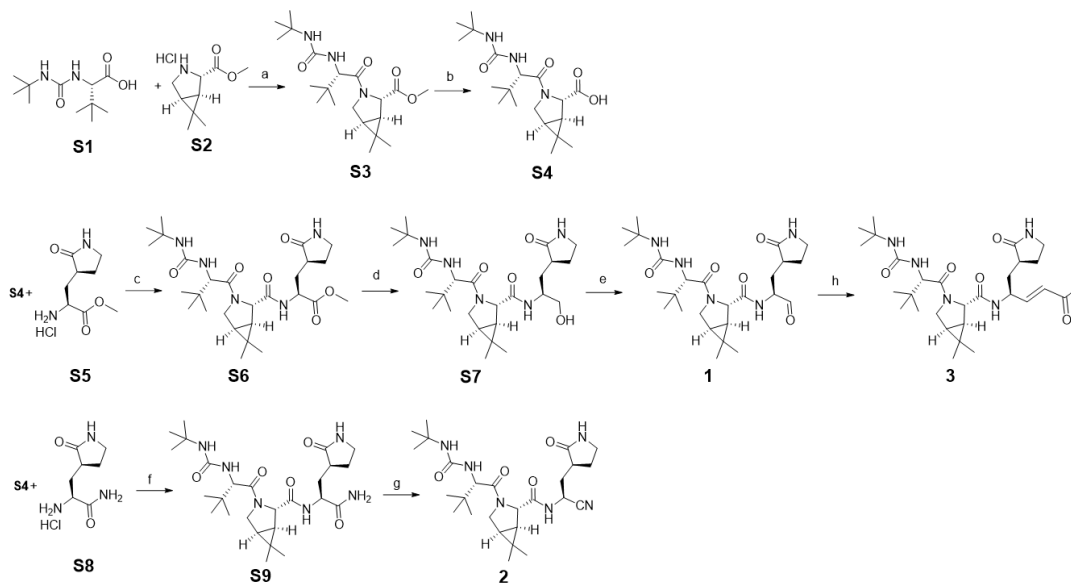

**Supplementary Fig. 15 | Procedure and synthetic scheme for compounds 1-3.**

Reagents and conditions: (a) 2-(7-Azabenzotriazol-1-yl)-*N,N,N',N'*-tetramethyluronium hexafluorophosphate (HATU), *N,N*-diisopropylethylamine (DIPEA), dichloromethane (DCM), 82%; (b) Lithium hydroxide monohydrate, H<sub>2</sub>O, MeOH, tetrahydrofuran (THF), 93%; (c) HATU, DIPEA, DCM, 88%; (d) NaBH<sub>4</sub>, THF, MeOH, 89%; (e) Dess-Martin Periodinane (DMP), NaHCO<sub>3</sub>, DCM, 84%; (f) HATU, DIPEA, DCM, 34%; (g) Burgess Reagent, DCM, 51%; (h) Diethyl (2-oxopropyl)phosphonate, K<sub>2</sub>CO<sub>3</sub>, THF, 28%.

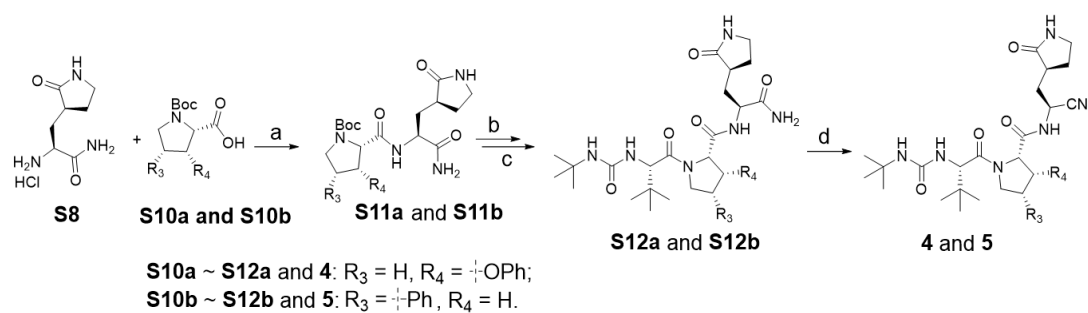

**Supplementary Fig. 16 | Procedure and synthetic scheme for compounds 4 and 5.**

Reagents and conditions: (a) HATU, DIPEA DCM, *N,N*-dimethylformamide (DMF); (b) 4 M HCl in dioxane, DCM; (c) Compound **S1**, HATU, DIPEA, DCM, DMF; (d) Burgess Reagent, DCM.

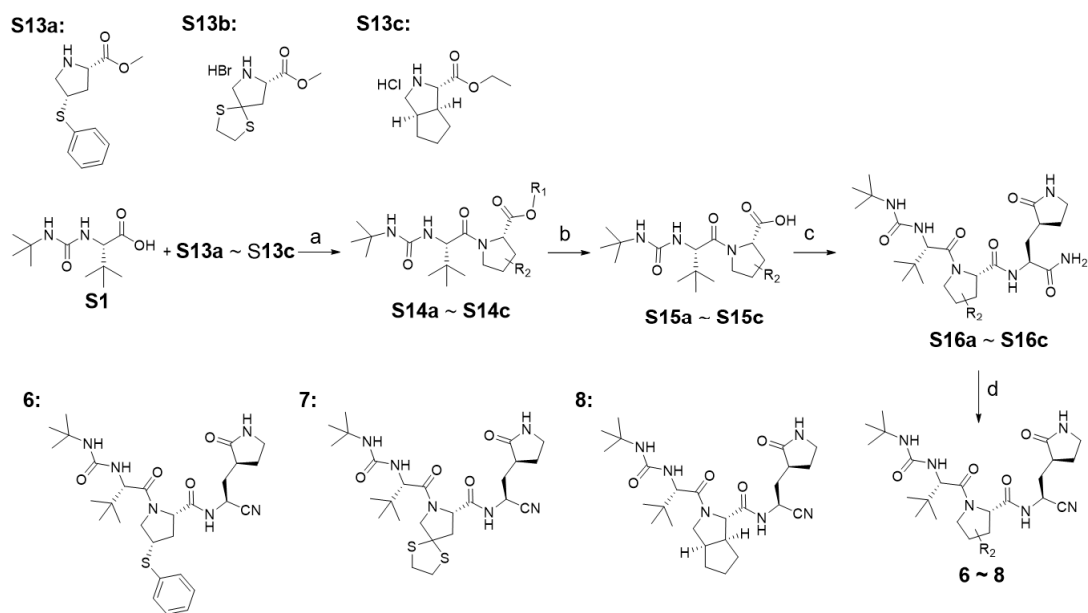

**Supplementary Fig. 17 | Procedure and synthetic scheme for compounds 6-8.**

Reagents and conditions: (a) i. HATU, DIPEA DCM; or 1H-benzotriazol-1-yloxytris(dimethylamino)phosphonium hexafluorophosphate (BOP), 4-methylmorpholine (NMM), DCM, DMF; (b) Lithium hydroxide monohydrate, H<sub>2</sub>O, MeOH, THF; (c) Compound S8, HATU, DIPEA, DCM; (d) Burgess Reagent, DCM.

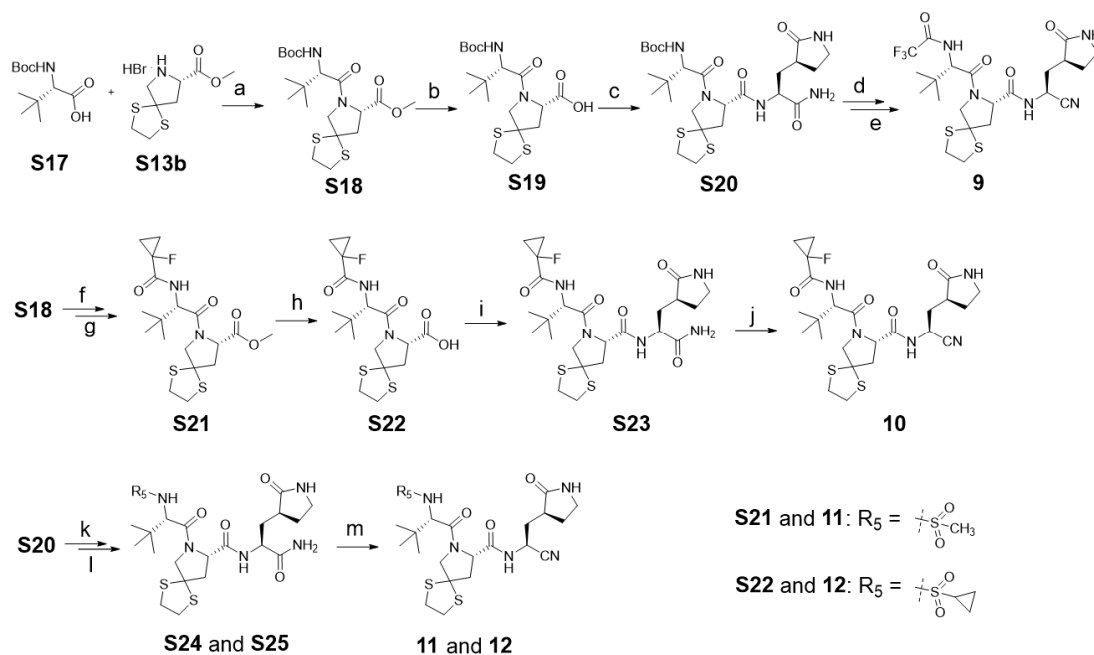

**Supplementary Fig. 18 | Procedure and synthetic scheme for compounds 9-12.**

Reagents and conditions: (a) BOP, NMM, DCM, DMF, 60%; (b) Lithium hydroxide monohydrate, H<sub>2</sub>O, MeOH, THF, 83%; (c) Compound **S8**, HATU, DIPEA, DCM, 40%; (d) 4 M HCl in dioxane, 1,4-dioxane; (e) triethylamine (Et<sub>3</sub>N), trifluoroacetic anhydride, DCM, 40% over two steps; (f) 4 M HCl in dioxane, 1,4-dioxane; (g) 1-Fluorocyclopropanecarboxylic acid, HATU, DIPEA, DCM, 90%; (h) Lithium hydroxide monohydrate, H<sub>2</sub>O, THF, 74%; (i) Compound **S8**, HATU, DIPEA, DCM, 60%; (j) Burgess Reagent, DCM, 41%; (k) 4 M HCl in dioxane, DCM; (l) Methanesulfonyl chloride or cyclopropanesulfonyl chloride, Et<sub>3</sub>N, DCM; (m) Burgess Reagent, DCM.

## S2: Supplementary Tables

**Supplementary Table 1 | Thermodynamic profiles of compounds 2, 7 and 10-12, simnotrelvir, and nirmatrelvir binding to SARS-CoV-2 3CL<sup>pro</sup> measured by ITC**

| Compounds    | $K_d$ (nM) | $\Delta G$ (kJ/mol) | $\Delta H$ (kJ/mol) | $-T\Delta S$ (kJ/mol) |
|--------------|------------|---------------------|---------------------|-----------------------|
| 2            | 2968 ± 138 | -32.08 ± 0.12       | -7.07 ± 0.43        | -25.01 ± 0.42         |
| 7            | 1683 ± 40  | -33.51 ± 0.06       | -13.35 ± 1.08       | -20.16 ± 1.12         |
| Nirmatrelvir | 620 ± 58   | -36.03 ± 0.24       | -25.71 ± 0.35       | -10.32 ± 0.30         |
| Simnotrelvir | 302 ± 49   | -37.87 ± 0.39       | -33.08 ± 0.59       | -4.79 ± 0.36          |
| 10           | 680 ± 10   | -35.79 ± 0.04       | -26.65 ± 2.38       | -9.14 ± 2.35          |
| 11           | 391 ± 67   | -37.22 ± 0.41       | -22.33 ± 1.08       | -14.89 ± 1.39         |
| 12           | 623 ± 47   | -36.02 ± 0.19       | -31.06 ± 1.20       | -4.96 ± 1.36          |

\* Data are shown as mean ± SD of three independent experiments.

**Supplementary Table 2 | Pharmacokinetic parameters resulted from single-dose intravenous and oral administration of simnotrelvir in rat and monkey.**

| <b>Species</b> | <b>Dose<br/>(PO, mg/kg)</b> | <b>Dose<br/>(IV, mg/kg)</b> | <b>CL<br/>(mL/min/kg)</b> | <b>V<sub>ss</sub><br/>(L/kg)</b> | <b>t<sub>1/2</sub><br/>(h)</b> | <b>F<br/>(%)</b> |
|----------------|-----------------------------|-----------------------------|---------------------------|----------------------------------|--------------------------------|------------------|
| Rat            | 15                          | 15                          | 59.3                      | 1.36                             | 0.45                           | 35.3             |
| Monkey         | 5                           | 5                           | 20.7                      | 1.50                             | 1.7                            | 41.9             |

\* Data are shown as mean of 6 biological replicates.

**Supplementary Table 3 | Pharmacokinetic parameters resulted from oral administration of simnotrelvir with or without ritonavir in rat and monkey.**

| <b>Compound</b>            | <b>Species</b> | <b>Dose<br/>(mg/kg)</b> | <b>T<sub>max</sub><br/>(h)</b> | <b>C<sub>max</sub><br/>(ng/mL)</b> | <b>AUC<sub>0-t</sub><br/>(ng·h/mL)</b> | <b>AUC<sub>0-∞</sub><br/>(ng·h/mL)</b> | <b>t<sub>1/2</sub><br/>(h)</b> |
|----------------------------|----------------|-------------------------|--------------------------------|------------------------------------|----------------------------------------|----------------------------------------|--------------------------------|
| simnotrelvir               | Rat            | 15                      | 0.25                           | 1580                               | 1700                                   | 1730                                   | 1.29                           |
| simnotrelvir<br>+ritonavir |                | 15                      | 0.5                            | 2760                               | 8920                                   | 9000                                   | 1.99                           |
| simnotrelvir               | Monkey         | 5                       | 0.5                            | 625                                | 1660                                   | 1790                                   | 5.63                           |
| simnotrelvir<br>+ritonavir |                | 5                       | 1.0                            | 2440                               | 17000                                  | 17200                                  | 2.38                           |

\* Data are shown as mean of 6 biological replicates.

\*\* The dose of ritonavir administrated to rat and monkey is 30 and 15 mg/kg, respectively.



**Supplementary Table 4 | Crystallography data collection and refinement statistics of SARS-CoV-2 3CL<sup>pro</sup> in complex with seven compounds.**

| <b>Compounds</b>                           | <b>1</b>     | <b>2</b>     | <b>3</b>     |
|--------------------------------------------|--------------|--------------|--------------|
| <b>PDB ID</b>                              | 8IFP         | 8IFQ         | 8IFR         |
| Space Group                                | P 21 21 2    | P 21 21 2    | P 21 21 2    |
| Cell Dimension: a (Å)                      | 45.678       | 45.564       | 45.582       |
| b (Å)                                      | 63.427       | 63.918       | 63.707       |
| c (Å)                                      | 105.59       | 105.364      | 105.502      |
| Wavelength (Å)                             | 0.979        | 0.979        | 0.979        |
| Reflections (unique)                       | 29403 (2952) | 21717 (2179) | 36576 (3547) |
| Resolution Range (Å)                       | 27.88-1.78   | 27.82-1.96   | 30.79-1.66   |
| Highest-Resolution Shell (Å)               | 1.84-1.78    | 2.03-1.96    | 1.72-1.66    |
| Redundancy                                 | 6.8 (7.2)    | 6.4 (6.5)    | 9.4 (9.9)    |
| I/σ (I)                                    | 15.75 (2.31) | 14.48 (3.33) | 14.05 (2.20) |
| Highest-Resolution Shell CC <sub>1/2</sub> | 0.765        | 0.888        | 0.600        |
| Completeness (%)                           | 94.9 (99.6)  | 95.1 (98.3)  | 98.9 (98.1)  |
| Rwork/Rfree                                | 0.266/0.293  | 0.179/0.214  | 0.181/0.215  |
| <b>RMS Values</b>                          |              |              |              |
| Bond length (Å)                            | 0.003        | 0.008        | 0.007        |
| Bond angle (°)                             | 0.615        | 0.977        | 0.870        |
| <b>Numbers of Non-hydrogen Atoms</b>       |              |              |              |
| Protein                                    | 2294         | 2331         | 2323         |
| Inhibitor                                  | 36           | 36           | 39           |
| Water Oxygen                               | 191          | 212          | 222          |
| Others                                     | 0            | 0            | 0            |
| Clashscore                                 | 3.09         | 1.94         | 2.81         |
| MolProbity Score                           | 1.17         | 0.96         | 1.07         |
| <b>B-factor (Å<sup>2</sup>)</b>            |              |              |              |
| Protein                                    | 25.02        | 24.79        | 27.43        |
| Inhibitor                                  | 19.80        | 20.12        | 20.67        |
| Water Oxygen                               | 25.66        | 31.97        | 37.30        |
| <b>Ramachandran plot</b>                   |              |              |              |
| Favored (%)                                | 97.69        | 98.02        | 98.68        |
| Allowed (%)                                | 2.31         | 1.65         | 1.32         |
| Outliers (%)                               | 0            | 0.33         | 0            |

**Supplementary Table 4 (continued) | Crystallography data collection and refinement statistics of SARS-CoV-2 3CL<sup>pro</sup> in complex with seven compounds.**

| <b>Compounds</b>                           | <b>7</b>     | <b>10</b>    | <b>Simnotrelvir</b> | <b>Nirmatrelvir</b> |
|--------------------------------------------|--------------|--------------|---------------------|---------------------|
| <b>PDB ID</b>                              | 8IFS         | 8IFT         | 8IGX                | 8IGY                |
| Space Group                                | P 1 21 1     | P 21 21 2    | P 21 21 2           | P 21 21 2           |
| Cell Dimension: a (Å)                      | 54.542       | 45.571       | 45.578              | 45.582              |
| b (Å)                                      | 82.106       | 63.153       | 62.831              | 63.619              |
| c (Å)                                      | 83.394       | 105.683      | 105.323             | 105.282             |
| Wavelength (Å)                             | 0.979        | 0.979        | 0.979               | 0.979               |
| Reflections (unique)                       | 27013 (2752) | 29018 (2852) | 24454 (2386)        | 20923 (2183)        |
| Resolution Range (Å)                       | 27.00-2.46   | 31.58-1.80   | 21.42-1.90          | 27.81-1.96          |
| Highest-Resolution Shell (Å)               | 2.55-2.46    | 1.86-1.80    | 1.97-1.90           | 2.03-1.96           |
| Redundancy                                 | 6.5 (6.7)    | 12.9 (12.8)  | 12.6 (11.1)         | 9.0 (7.8)           |
| I/σ (I)                                    | 9.57 (2.38)  | 10.52 (1.66) | 9.33(1.95)          | 15.93 (2.68)        |
| Highest-Resolution Shell CC <sub>1/2</sub> | 0.954        | 0.752        | 0.787               | 0.828               |
| Completeness (%)                           | 95.0 (98.6)  | 99.9 (100.0) | 99.5 (99.8)         | 92.2 (99.8)         |
| Rwork/Rfree                                | 0.266/0.296  | 0.184/0.204  | 0.176/0.213         | 0.187/0.205         |
| <b>RMS Values</b>                          |              |              |                     |                     |
| Bond length (Å)                            | 0.004        | 0.009        | 0.009               | 0.006               |
| Bond angle (°)                             | 0.662        | 0.981        | 0.897               | 0.804               |
| <b>Numbers of Non-hydrogen Atoms</b>       |              |              |                     |                     |
| Protein                                    | 4454         | 2328         | 2335                | 2287                |
| Inhibitor                                  | 74           | 36           | 36                  | 35                  |
| Water Oxygen                               | 9            | 215          | 167                 | 118                 |
| Others                                     | 0            | 0            | 0                   | 0                   |
| Clashscore                                 | 1.72         | 1.95         | 1.72                | 2.44                |
| MolProbity Score                           | 0.93         | 1.13         | 0.93                | 1.03                |
| <b>B-factor (Å<sup>2</sup>)</b>            |              |              |                     |                     |
| Protein                                    | 61.74        | 28.17        | 27.17               | 27.22               |
| Inhibitor                                  | 58.33        | 22.74        | 24.65               | 25.08               |
| Water Oxygen                               | 57.96        | 36.46        | 33.66               | 36.85               |
| <b>Ramachandran plot</b>                   |              |              |                     |                     |
| Favored (%)                                | 97.82        | 97.04        | 98.02               | 98.02               |
| Allowed (%)                                | 2.18         | 2.96         | 1.98                | 1.98                |
| Outliers (%)                               | 0            | 0            | 0                   | 0                   |

**Supplementary Table 5 | The scoring system for lung histopathology assessment.**

| Score                                     | 0           | 1                                                                    | 2                                                                                   | 3                                                                            | 4                     |
|-------------------------------------------|-------------|----------------------------------------------------------------------|-------------------------------------------------------------------------------------|------------------------------------------------------------------------------|-----------------------|
| <b>Alveolar atrophy or dilatation</b>     | <b>None</b> | Mild,<br>< 10% area                                                  | Moderate,<br>10% to 25% area                                                        | Significant,<br>25% to 50% area                                              | Severe,<br>≥ 50% area |
| <b>Alveolar hemorrhage</b>                | <b>None</b> | Mild,<br>< 10% area                                                  | Moderate,<br>10% to 25% area                                                        | Significant,<br>25% to 50% area                                              | Severe,<br>≥ 50% area |
| <b>Alveolar wall thickening</b>           | <b>None</b> | Mild,<br>< 10% area                                                  | Moderate,<br>10% to 25% area                                                        | Significant,<br>25% to 50% area                                              | Severe,<br>≥ 50% area |
| <b>Infiltration of inflammatory cells</b> | <b>None</b> | Few<br>inflammatory<br>cell<br>accumulation<br>near blood<br>vessels | Obvious<br>inflammatory cell<br>surrounding blood<br>vessels and<br>alveolar spaces | Massive<br>inflammatory<br>cell in alveolar<br>and interstitial<br>locations | /                     |

**Supplementary Table 6 | The scoring system for brain histopathology assessment.**

| <b>Score</b>                                          | <b>0</b> | <b>1</b>          | <b>2</b>                   | <b>3</b>               | <b>4</b>  |
|-------------------------------------------------------|----------|-------------------|----------------------------|------------------------|-----------|
| <b>Bleeding</b>                                       | None     | < 10% area        | 11% to 50%<br>area         | 51% to 75%<br>area     | >75% area |
| <b>Neuron<br/>degeneration<br/>in<br/>hippocampus</b> | None     | Few,<br>< 5% area | Obvious,<br>5% to 25% area | Frequent,<br>>25% area | /         |
| <b>Neuron<br/>degeneration<br/>in cortex</b>          | None     | Few,<br>< 5% area | Obvious,<br>5% to 25% area | Frequent,<br>>25% area | /         |

### S3: Spectral Data for Synthetic Compounds

**Methyl (1R,2S,5S)-3-((S)-2-(3-(tert-butyl)ureido)-3,3-dimethylbutanoyl)-6,6-dimethyl-3-azabicyclo[3.1.0]hexane-2-carboxylate (S3).** Compound **S1** (575 mg, 2.5 mmol) and compound **S2** (513 mg, 2.5 mmol) were dissolved in DCM (20 mL) under N<sub>2</sub> atmosphere, HATU (1 g, 2.6 mmol) was added into the reaction and stirred at 25 °C for 1 h. Then DIPEA (1.30 mL, 7.5 mmol) was added to the reaction and stirred at 25 °C for 4 h. DCM (50 mL) and 1N HCl aqueous solution (25 mL) were added to the reaction. After separation, the organic phase was washed with water (25 mL), saturated brine (25 mL), and dried over anhydrous sodium sulphate, evaporated in vacuum and purified by column chromatography to afford the compound **S3** as white solid (780 mg, yield: 82%). <sup>1</sup>H NMR (500 MHz, DMSO-*d*<sub>6</sub>) δ 5.96 (s, 1H), 5.90 (d, *J* = 10.0 Hz, 1H), 4.18 (s, 1H), 4.15 (d, *J* = 9.9 Hz, 1H), 3.77 (dd, *J* = 10.3, 5.3 Hz, 1H), 3.64 (s, 3H), 1.51 (dd, *J* = 7.5, 5.2 Hz, 1H), 1.40 (d, *J* = 7.5 Hz, 1H), 1.17 (d, *J* = 2.9 Hz, 10H), 1.00 (s, 3H), 0.91 (s, 9H), 0.82 (s, 3H). <sup>13</sup>C NMR (101 MHz, DMSO-*d*<sub>6</sub>) δ 172.04, 171.76, 157.67, 59.01, 57.03, 52.35, 49.44, 47.44, 34.48, 30.06, 29.55, 27.42, 26.68, 26.25, 19.38, 12.69. ESI-HRMS Calcd for C<sub>20</sub>H<sub>36</sub>N<sub>3</sub>O<sub>4</sub> [M+H]<sup>+</sup>: 382.2700, found 382.2700.

**(1R,2S,5S)-3-((S)-2-(3-(tert-butyl)ureido)-3,3-dimethylbutanoyl)-6,6-dimethyl-3-azabicyclo[3.1.0]hexane-2-carboxylic acid (S4).** Compound **S3** (620 mg, 1.6 mmol) was dissolved in THF (4 mL), and then lithium hydroxide monohydrate (76 mg, 1.8 mmol), water (2 mL) and MeOH (2 mL) were added. The mixture was stirred at 45 °C for 1 h. When reaction completed, most of the MeOH and THF were evaporated under vacuum, water (5 mL) and 1N HCl aqueous solution (about 1.8 mL) was added to the reaction, white solid was precipitated and filtered. The solid was washed by water and dried in vacuum to give the compound **S4** (547 mg, yield: 93%). <sup>1</sup>H NMR (400 MHz, DMSO-*d*<sub>6</sub>) δ 12.63 (s, 1H), 5.96 (s, 1H), 5.89 (d, *J* = 10.1 Hz, 1H), 4.15 (d, *J* = 10.0 Hz, 1H), 4.10 (d, *J* = 2.4 Hz, 1H), 3.99 (d, *J* = 10.5 Hz, 1H), 3.79-3.67 (m, 1H), 1.47 (d, *J* = 5.9 Hz, 1H), 1.38 (d, *J* = 7.6 Hz, 1H), 1.16 (d, *J* = 2.5 Hz, 9H), 1.00 (d, *J* = 2.4 Hz, 3H), 0.91 (s, 9H), 0.81 (d, *J* = 2.4 Hz, 3H). <sup>13</sup>C NMR (101 MHz, DMSO-*d*<sub>6</sub>) δ 173.16, 171.59, 157.69, 59.17, 57.02, 49.42, 47.43, 34.57, 30.29, 29.57, 27.29, 26.77, 26.34, 19.23, 12.77. ESI-HRMS Calcd for C<sub>19</sub>H<sub>34</sub>N<sub>3</sub>O<sub>4</sub> [M+H]<sup>+</sup>: 368.2544, found 368.2547.

**Methyl (S)-2-((1R,2S,5S)-3-((S)-2-(3-(tert-butyl)ureido)-3,3-dimethylbutanoyl)-6,6-dimethyl-3-azabicyclo[3.1.0]hexane-2-carboxamido)-3-((S)-2-oxopyrrolidin-3-yl)propanoate (S6).** Compound **S6** was prepared according to the procedure of compound **S3**, white solid, yield: 88%. <sup>1</sup>H NMR (500 MHz, DMSO-*d*<sub>6</sub>) δ 8.55 (d, *J* = 8.6 Hz, 1H), 7.58 (s, 1H), 5.94 (s, 1H), 5.85 (d, *J* = 9.9 Hz, 1H), 4.43 (ddd, *J* = 12.2, 8.6, 3.9 Hz, 1H), 4.22 (s, 1H), 4.10 (d, *J* = 9.9 Hz, 1H), 3.93 (d, *J* = 10.1 Hz, 1H), 3.80

(dd,  $J = 10.1, 5.4$  Hz, 1H), 3.64 (s, 3H), 3.14 (t,  $J = 9.2$  Hz, 1H), 3.03 (td,  $J = 9.3, 6.9$  Hz, 1H), 2.44 (ddd,  $J = 11.3, 8.3, 3.4$  Hz, 1H), 2.16-2.00 (m, 2H), 1.58 (tdd,  $J = 13.7, 11.6, 6.6$  Hz, 2H), 1.48 (dd,  $J = 7.6, 5.3$  Hz, 1H), 1.23 (d,  $J = 7.7$  Hz, 1H), 1.17 (s, 9H), 1.02 (s, 3H), 0.89 (s, 9H), 0.86 (s, 3H).  $^{13}\text{C}$  NMR (101 MHz, DMSO- $d_6$ )  $\delta$  178.69, 173.58, 170.98, 170.88, 157.39, 59.89, 56.78, 50.42, 48.94, 47.45, 37.29, 34.06, 33.96, 30.51, 29.11, 27.45, 27.26, 26.40, 26.01, 18.57, 12.59. ESI-HRMS Calcd for  $\text{C}_{27}\text{H}_{46}\text{N}_5\text{O}_6$   $[\text{M}+\text{H}]^+$ : 536.3443, found 536.3446.

**(1R,2S,5S)-3-((S)-2-(3-(tert-butyl)ureido)-3,3-dimethylbutanoyl)-N-((S)-1-hydroxy-3-((S)-2-oxopyrrolidin-3-yl)propan-2-yl)-6,6-dimethyl-3-azabicyclo[3.1.0]hexane-2-carboxamide (S7)**. Compound S6 (462 mg, 0.86 mmol) was dissolved in THF (10 mL).  $\text{NaBH}_4$  (198 mg, 5.2 mmol) was added in batches to the reaction under ice bath, and then anhydrous MeOH (1 mL) was added drop by drop slowly. Removed the ice bath, the reaction was stirred at 25 °C for 2 h.  $\text{NH}_4\text{Cl}$  saturated solution (10 mL) and ethyl acetate (EA, 10 mL) were added and then separated. The aqueous phase was extracted by EA (10 mL) twice. The combined EA was washed by with saturated brine (20 mL), dried over anhydrous sodium sulphate, evaporated in vacuum and purified by column chromatography to obtain the compound S7 as white solid (390 mg, yield: 89%).  $^1\text{H}$  NMR (500 MHz, DMSO- $d_6$ )  $\delta$  7.77 (d,  $J = 9.4$  Hz, 1H), 7.43 (s, 1H), 5.93 (s, 1H), 5.84 (d,  $J = 10.0$  Hz, 1H), 4.65 (t,  $J = 5.7$  Hz, 1H), 4.13 (s, 1H), 4.08 (d,  $J = 9.9$  Hz, 1H), 3.90 (d,  $J = 10.2$  Hz, 1H), 3.79 (dd,  $J = 10.1, 5.4$  Hz, 2H), 3.25 (dt,  $J = 10.5, 6.2$  Hz, 1H), 3.16 (d,  $J = 5.0$  Hz, 1H), 3.09 (t,  $J = 9.1$  Hz, 1H), 2.97 (td,  $J = 9.4, 7.0$  Hz, 1H), 2.47 – 2.34 (m, 1H), 2.16 (dt,  $J = 14.6, 7.7$  Hz, 1H), 1.75-1.68 (m, 1H), 1.57-1.40 (m, 2H), 1.32-1.24 (m, 2H), 1.15 (s, 9H), 0.99 (s, 3H), 0.89 (s, 9H), 0.84 (s, 3H).  $^{13}\text{C}$  NMR (101 MHz, DMSO- $d_6$ )  $\delta$  179.66, 171.31, 171.17, 157.92, 64.64, 60.50, 57.33, 49.39, 48.78, 47.93, 37.52, 34.55, 33.50, 31.23, 29.57, 28.31, 27.80, 26.90, 26.49, 19.03, 13.08. ESI-HRMS Calcd for  $\text{C}_{26}\text{H}_{46}\text{N}_5\text{O}_5$   $[\text{M}+\text{H}]^+$ : 508.3493, found 508.3499.

**(1R,2S,5S)-3-((S)-2-(3-(tert-butyl)ureido)-3,3-dimethylbutanoyl)-6,6-dimethyl-N-((S)-1-oxo-3-((S)-2-oxopyrrolidin-3-yl)propan-2-yl)-3-azabicyclo[3.1.0]hexane-2-carboxamide (1)**. Compound S7 (230 mg, 0.45 mmol) was dissolved in dried DCM (8 mL) under  $\text{N}_2$  atmosphere. DMP (207 mg, 0.49 mmol) and  $\text{NaHCO}_3$  (82 mg, 0.98 mmol) were added to the solution. The reaction was stirred at 25 °C for 2 h. The solution was filtered, and the filter cake was washed by DCM (10 mL). The organic phase was washed by  $\text{Na}_2\text{S}_2\text{O}_3$  saturated solution (10 mL),  $\text{NaHCO}_3$  saturated solution (10 mL), saturated brine (10 mL) and dried over anhydrous sodium sulphate, evaporated in vacuum and purified by column chromatography to afford the compound 1 as white solid (192 mg, yield: 84%).  $^1\text{H}$  NMR (400 MHz, DMSO- $d_6$ )  $\delta$  9.47 (s, 1H), 8.52 (d,  $J = 8.2$  Hz, 1H), 7.58 (s, 1H), 5.95 (d,  $J = 7.7$  Hz, 1H), 5.86 (d,  $J = 9.8$  Hz, 1H), 4.32 (t,

$J = 10.1$  Hz, 1H), 4.22 (s, 1H), 4.10 (d,  $J = 9.8$  Hz, 1H), 3.94 (d,  $J = 10.3$  Hz, 1H), 3.81 (t,  $J = 7.5$  Hz, 1H), 3.15-3.03 (m, 2H), 2.43 (d,  $J = 10.2$  Hz, 1H), 2.13 (s, 2H), 1.84 (s, 1H), 1.59 (s, 1H), 1.50 (d,  $J = 7.1$  Hz, 1H), 1.33 (s, 1H), 1.17 (s, 9H), 1.02 (s, 3H), 0.89 (s, 9H), 0.86 (s, 3H).  $^{13}\text{C}$  NMR (101 MHz, DMSO- $d_6$ )  $\delta$  201.60, 178.84, 172.12, 171.37, 157.86, 60.25, 57.29, 56.30, 49.42, 47.85, 37.69, 37.36, 34.51, 31.20, 30.20, 29.78, 29.58, 27.85, 26.86, 26.45, 19.19, 13.03. ESI-HRMS Calcd for  $\text{C}_{26}\text{H}_{44}\text{N}_5\text{O}_5$   $[\text{M}+\text{H}]^+$ : 506.3337, found 506.3342. HPLC purity 98.5% ( $R_t = 4.688$  min, Method A).

**(1R,2S,5S)-N-((S)-1-amino-1-oxo-3-((S)-2-oxopyrrolidin-3-yl)propan-2-yl)-3-((S)-2-(3-(tert-butyl)ureido)-3,3-dimethylbutanoyl)-6,6-dimethyl-3-azabicyclo[3.1.0]hexane-2-carboxamide (S9)**. Compound **S9** was prepared according to the procedure of compound **S3**, white solid, yield: 34%.  $^1\text{H}$  NMR (400 MHz, DMSO- $d_6$ )  $\delta$  8.20 (d,  $J = 8.7$  Hz, 1H), 7.53 (s, 1H), 7.36-7.20 (m, 1H), 7.11-6.93 (m, 1H), 5.93 (s, 1H), 5.85 (d,  $J = 9.9$  Hz, 1H), 4.27 (td,  $J = 8.6, 4.3$  Hz, 1H), 4.21 (s, 1H), 4.11 (d,  $J = 9.9$  Hz, 1H), 3.92 (d,  $J = 10.2$  Hz, 1H), 3.79 (dd,  $J = 10.1, 5.3$  Hz, 1H), 3.12 (t,  $J = 9.0$  Hz, 1H), 3.02 (td,  $J = 9.3, 7.0$  Hz, 1H), 2.42 (dq,  $J = 14.4, 5.7, 3.7$  Hz, 1H), 2.19-2.06 (m, 1H), 1.94 (ddd,  $J = 13.5, 11.9, 3.7$  Hz, 1H), 1.67-1.57 (m, 1H), 1.57-1.47 (m, 1H), 1.47-1.41 (m, 1H), 1.34 (d,  $J = 7.7$  Hz, 1H), 1.16 (s, 9H), 1.00 (s, 3H), 0.89 (s, 9H), 0.84 (s, 3H).  $^{13}\text{C}$  NMR (101 MHz, DMSO- $d_6$ )  $\delta$  178.69, 173.58, 170.98, 170.88, 157.39, 59.89, 56.78, 50.42, 48.94, 47.45, 37.29, 34.06, 33.96, 30.51, 29.11, 27.45, 27.26, 26.40, 26.01, 18.57, 12.59. ESI-HRMS Calcd for  $\text{C}_{26}\text{H}_{45}\text{N}_6\text{O}_5$   $[\text{M}+\text{H}]^+$ : 521.3446, found 521.3456.

**(1R,2S,5S)-3-((S)-2-(3-(tert-butyl)ureido)-3,3-dimethylbutanoyl)-N-((S)-1-cyano-2-((S)-2-oxopyrrolidin-3-yl)ethyl)-6,6-dimethyl-3-azabicyclo[3.1.0]hexane-2-carboxamide (2)**. Compound **S9** (226 mg, 0.43 mmol) was dissolved in dried DCM (5 mL) under  $\text{N}_2$  atmosphere. Burgess Reagent (119 mg, 0.5 mmol) was added and stirred at 25 °C for 10 h. The mixture was concentrated and purified by column chromatography to give the compound **2** as white solid (110 mg, yield: 51%).  $^1\text{H}$  NMR (600 MHz, DMSO- $d_6$ )  $\delta$  8.95 (d,  $J = 8.6$  Hz, 1H), 7.65 (s, 1H), 5.93 (s, 1H), 5.85 (d,  $J = 10.1$  Hz, 1H), 4.95 (ddd,  $J = 11.0, 8.6, 5.2$  Hz, 1H), 4.12 (s, 1H), 4.09 (d,  $J = 10.0$  Hz, 1H), 3.94 (d,  $J = 10.2$  Hz, 1H), 3.81 (dd,  $J = 10.3, 5.5$  Hz, 1H), 3.17-3.10 (m, 1H), 3.03 (td,  $J = 9.3, 7.0$  Hz, 1H), 2.44 (tdd,  $J = 10.3, 8.3, 4.4$  Hz, 1H), 2.15 (ddd,  $J = 13.5, 11.0, 4.4$  Hz, 1H), 2.11-2.02 (m, 1H), 1.74-1.63 (m, 2H), 1.52 (dd,  $J = 7.7, 5.4$  Hz, 1H), 1.26 (d,  $J = 7.6$  Hz, 1H), 1.16 (s, 9H), 1.01 (s, 3H), 0.88 (s, 9H), 0.85 (s, 3H).  $^{13}\text{C}$  NMR (101 MHz, DMSO- $d_6$ )  $\delta$  178.01, 171.52, 171.49, 157.87, 120.15, 60.10, 57.30, 55.38, 49.43, 47.85, 38.19, 37.13, 34.57, 34.45, 30.78, 29.57, 27.95, 27.34, 26.84, 26.34, 19.30, 12.99. ESI-HRMS Calcd for  $\text{C}_{26}\text{H}_{43}\text{N}_6\text{O}_4$   $[\text{M}+\text{H}]^+$ : 503.3340, found 503.3338. HPLC purity 99.1% ( $R_t = 9.530$  min, Method B).

**(1R,2S,5S)-3-((S)-2-(3-(tert-butyl)ureido)-3,3-dimethylbutanoyl)-6,6-dimethyl-N-((S,E)-5-oxo-1-((S)-2-oxopyrrolidin-3-yl)hex-3-en-2-yl)-3-azabicyclo[3.1.0]hexane-2-carboxamide (3).** Diethyl (2-oxopropyl)phosphonate (72  $\mu$ L, 0.41 mmol) and  $K_2CO_3$  (170 mg, 1.23 mmol) were dissolved in anhydrous THF (10 mL) under  $N_2$  atmosphere. The mixture was stirred for 0.5 h under reflux and then compound **1** (173 mg, 0.34 mmol) in THF (1 mL) was added. The reaction was stirred for 2 h under reflux. When the reaction completed, water (10 mL) and EA (10 mL) were added to the solution and then separated. The aqueous phase was extracted by EA (10 mL) twice. The combined EA was washed by with saturated brine (20 mL), dried over anhydrous sodium sulphate, evaporated in vacuum and purified by column chromatography to give the compound **3** as white solid (52 mg, yield: 28%).  $^1H$  NMR (500 MHz,  $DMSO-d_6$ )  $\delta$  8.30 (d,  $J = 9.0$  Hz, 1H), 7.54 (s, 1H), 6.84 (dd,  $J = 16.1, 4.7$  Hz, 1H), 6.05 (dd,  $J = 16.2, 1.7$  Hz, 1H), 5.94 (s, 1H), 5.87 (d,  $J = 9.9$  Hz, 1H), 4.56 (d,  $J = 10.9$  Hz, 1H), 4.20 (s, 1H), 4.10 (d,  $J = 9.5$  Hz, 1H), 3.93 (d,  $J = 10.2$  Hz, 1H), 3.82 (dd,  $J = 10.1, 5.4$  Hz, 1H), 3.13 (t,  $J = 9.2$  Hz, 1H), 3.02 (td,  $J = 9.3, 7.0$  Hz, 1H), 2.22 (s, 3H), 2.14 (dt,  $J = 14.1, 7.7$  Hz, 1H), 1.86 (td,  $J = 13.1, 3.4$  Hz, 1H), 1.68-1.56 (m, 1H), 1.53-1.40 (m, 2H), 1.24 (d,  $J = 7.6$  Hz, 1H), 1.17 (s, 10H), 1.02 (s, 3H), 0.90 (s, 9H), 0.87 (s, 3H).  $^{13}C$  NMR (201 MHz,  $DMSO-d_6$ )  $\delta$  198.63, 179.05, 171.36, 157.93, 149.01, 129.37, 60.42, 57.34, 49.42, 47.89, 47.53, 37.75, 36.02, 34.52, 31.20, 29.57, 27.94, 27.90, 27.40, 26.89, 26.47, 19.19, 13.07, 0.59. ESI-HRMS Calcd for  $C_{29}H_{48}N_5O_5$   $[M+H]^+$ : 546.3650, found 546.3649. HPLC purity 98.0% ( $R_t = 7.554$  min, Method C).

**Tert-butyl (2S,3R)-2-(((S)-1-amino-1-oxo-3-((S)-2-oxopyrrolidin-3-yl)propan-2-yl)carbamoyl)-3-phenoxypropanoate (S11a).** Compound **S8** (311 mg, 1.5 mmol) and compound **S10a** (460 mg, 1.5 mmol) were dissolved in DCM (8 mL) and DMF (8 mL), HATU (570 mg, 1.5 mmol) was added into the reaction and stirred at 25  $^\circ C$  for 1 h. Then DIPEA (0.78 mL, 4.5 mmol) was added to the reaction and stirred at 25  $^\circ C$  for 2 h. When the reaction completed, DCM (10 mL) and 1N HCl aqueous solution (20 mL) were added to the reaction. After separation, the organic phase was washed with water (20 mL) twice, the organic phase was washed with saturated brine (25 mL), dried over anhydrous sodium sulphate, evaporated in vacuum and purified by column chromatography to afford the compound **S11a** as white solid (490 mg, yield: 71%).  $^1H$  NMR (500 MHz,  $DMSO-d_6$ )  $\delta$  8.17 (d,  $J = 8.6$  Hz, 1H), 7.62 (d,  $J = 8.8$  Hz, 1H), 7.35-7.11 (m, 4H), 6.93 (t,  $J = 7.3$  Hz, 1H), 6.88 (t,  $J = 7.9$  Hz, 2H), 4.97-4.89 (m, 1H), 4.33-4.19 (m, 2H), 3.76 (dd,  $J = 12.1, 5.1$  Hz, 1H), 3.57-3.40 (m, 1H), 3.11 (d,  $J = 9.6$  Hz, 1H), 2.93 (dt,  $J = 17.3, 8.5$  Hz, 1H), 2.61 (dd,  $J = 9.7, 5.0$  Hz, 1H), 2.30-2.16 (m, 1H), 2.15-1.94 (m, 3H), 1.74-1.45 (m, 2H), 1.42 (s, 9H).  $^{13}C$  NMR (101 MHz,  $DMSO-d_6$ )  $\delta$  178.72, 174.10, 172.12, 157.37, 154.09, 129.98, 121.29, 115.92, 80.06,



75.67, 59.66, 51.27, 45.96, 38.19, 33.59, 28.51, 28.02, 10.72. ESI-HRMS Calcd for  $C_{23}H_{33}N_4O_6$   $[M+H]^+$ : 461.2395, found 461.2399.

**(2S,3R)-N-((S)-1-amino-1-oxo-3-((S)-2-oxopyrrolidin-3-yl)propan-2-yl)-1-((S)-2-(3-(tert-butyl)ureido)-3,3-dimethylbutanoyl)-3-phenoxy pyrrolidine-2-carboxamide**

**(S12a)**. Compound **S11a** (189 mg, 0.41 mmol) and 4 M HCl in 1,4-dioxane (1 mL) were dissolved in DCM (1 mL), the reaction was stirred at 25 °C for 0.5 h. And then the solution was concentrated to remove the solvent, dry HCl salt was obtained. On the other hand, compound **1** (95 mg, 0.41 mmol) and HATU (156 mg, 0.41 mmol) were dissolved in DCM (8 mL) and DMF (8 mL) under  $N_2$  atmosphere, the reaction was stirred at 25 °C for 0.5 h. Then DIPEA (0.22 mL, 1.23 mmol), and HCl salt were added to the reaction, the reaction mixture was stirred for 10 h at 25 °C. Then DCM (20 mL) and 1N HCl aqueous solution (20 mL) were added to the reaction. After separation, the organic phase was washed with water (20 mL) twice, the organic phase was washed with saturated brine (20 mL), dried over anhydrous sodium sulphate, evaporated in vacuum and purified by column chromatography to give compound **S12a** as white solid (196 mg, yield: 83%).  $^1H$  NMR (400 MHz, DMSO- $d_6$ )  $\delta$  8.02 (d,  $J$  = 8.7 Hz, 1H), 7.56 (s, 1H), 7.36-7.23 (m, 3H), 7.07 (s, 1H), 6.96 (d,  $J$  = 7.7 Hz, 3H), 6.02 (d,  $J$  = 9.3 Hz, 1H), 5.97 (s, 1H), 5.04 (t,  $J$  = 6.3 Hz, 1H), 4.41 (t,  $J$  = 7.9 Hz, 1H), 4.31 (dd,  $J$  = 10.5, 5.5 Hz, 2H), 4.22 (d,  $J$  = 9.2 Hz, 1H), 3.58 (dd,  $J$  = 10.9, 5.7 Hz, 1H), 3.12 (t,  $J$  = 9.2 Hz, 1H), 3.01 (q,  $J$  = 8.7 Hz, 1H), 2.60 (dd,  $J$  = 13.9, 7.3 Hz, 1H), 2.44 (d,  $J$  = 10.2 Hz, 1H), 2.18 (d,  $J$  = 8.6 Hz, 1H), 2.01-1.89 (m, 2H), 1.64 (p,  $J$  = 9.2, 8.4 Hz, 1H), 1.49 (t,  $J$  = 12.2 Hz, 1H), 1.20 (s, 9H), 0.91 (s, 9H).  $^{13}C$  NMR (126 MHz, DMSO- $d_6$ )  $\delta$  178.76, 173.48, 171.43, 170.81, 157.11, 129.62, 121.18, 115.59, 74.60, 58.39, 56.73, 52.44, 50.50, 49.04, 37.42, 34.99, 34.40, 34.24, 29.31, 27.60, 26.33. ESI-HRMS Calcd for  $C_{29}H_{45}N_6O_6$   $[M+H]^+$ : 573.3395, found 573.3397.

**(2S,3R)-1-((S)-2-(3-(tert-butyl)ureido)-3,3-dimethylbutanoyl)-N-((S)-1-cyano-2-((S)-2-oxopyrrolidin-3-yl)ethyl)-3-phenoxy pyrrolidine-2-carboxamide** (4).

Compound **4** was prepared according to the procedure of compound **2**, white solid, yield: 38%.  $^1H$  NMR (500 MHz, DMSO- $d_6$ )  $\delta$  8.80 (dd,  $J$  = 8.6, 3.3 Hz, 1H), 7.65 (s, 1H), 7.29 (t,  $J$  = 7.8 Hz, 2H), 6.97 (d,  $J$  = 7.8 Hz, 3H), 6.04-5.92 (m, 2H), 5.16-4.90 (m, 2H), 4.33 (ddd,  $J$  = 25.8, 9.4, 6.4 Hz, 2H), 4.21 (d,  $J$  = 9.5 Hz, 1H), 3.59 (dd,  $J$  = 10.7, 5.4 Hz, 1H), 3.14 (t,  $J$  = 9.3 Hz, 1H), 3.04 (q,  $J$  = 8.6 Hz, 1H), 2.63 (p,  $J$  = 7.0 Hz, 1H), 2.46 (q,  $J$  = 4.5 Hz, 1H), 2.16 (td,  $J$  = 13.4, 11.7, 5.6 Hz, 2H), 1.94 (dt,  $J$  = 12.9, 6.4 Hz, 1H), 1.71 (dtd,  $J$  = 22.3, 9.9, 9.3, 4.2 Hz, 2H), 1.20 (s, 9H), 0.90 (s, 9H).  $^{13}C$  NMR (126 MHz, DMSO- $d_6$ )  $\delta$  178.10, 171.57, 171.27, 157.51, 157.46, 130.05, 121.63, 120.11, 116.10, 74.99, 58.35, 57.11, 52.64, 49.46, 38.41, 37.22, 35.40, 34.85, 34.66, 29.75, 27.49, 26.74. ESI-HRMS Calcd for  $C_{29}H_{43}N_6O_5$   $[M+H]^+$ : 555.3289, found 555.3293.

HPLC purity 95.4% (Rt = 10.788 min, Method B).

***Tert-butyl (2S,4R)-2-(((S)-1-amino-1-oxo-3-((S)-2-oxopyrrolidin-3-yl)propan-2-yl)carbamoyl)-4-phenyl-1H-pyrrolidine-1-carboxylate (S11b)***. Compound **S11b** was prepared according to the procedure of compound **S11a**, white solid, yield: 68%. <sup>1</sup>H NMR (500 MHz, DMSO-*d*<sub>6</sub>) δ 8.24 (d, 8.2 Hz, 1H), 7.66 (d, *J* = 11.2 Hz, 1H), 7.32 (td, *J* = 15.1, 13.7, 6.2 Hz, 4H), 7.25 (dd, *J* = 15.0, 7.9 Hz, 2H), 7.07 (d, *J* = 13.8 Hz, 1H), 4.34-4.19 (m, 2H), 3.90 (dt, *J* = 20.5, 8.2 Hz, 1H), 3.39 (t, *J* = 6.1 Hz, 1H), 3.25 (t, *J* = 10.4 Hz, 1H), 3.21-3.03 (m, 2H), 2.68-2.52 (m, 1H), 2.43 (d, *J* = 9.3 Hz, 1H), 2.22 (dt, *J* = 28.4, 10.4 Hz, 1H), 2.05-1.90 (m, 1H), 1.82 (dt, *J* = 23.1, 11.7 Hz, 1H), 1.75-1.45 (m, 2H), 1.37 (s, 9H). <sup>13</sup>C NMR (126 MHz, DMSO-*d*<sub>6</sub>) δ 179.12, 174.09, 172.11, 157.34, 154.96, 154.12, 129.99, 121.32, 115.98, 80.08, 75.69, 60.22, 59.98, 52.55, 51.30, 38.20, 35.42, 33.62, 28.51, 28.03. ESI-HRMS Calcd for C<sub>23</sub>H<sub>33</sub>N<sub>4</sub>O<sub>5</sub> [M+H]<sup>+</sup>: 445.2445, found 445.2446.

***(2S,4R)-N-((S)-1-amino-1-oxo-3-((S)-2-oxopyrrolidin-3-yl)propan-2-yl)-1-((S)-2-(3-(tert-butyl)ureido)-3,3-dimethylbutanoyl)-4-phenylpyrrolidine-2-carboxamide (S12b)***. Compound **S12b** was prepared according to the procedure of compound **S12a**, white solid, yield: 86%. <sup>1</sup>H NMR (400 MHz, DMSO-*d*<sub>6</sub>) δ 8.31 (d, *J* = 8.8 Hz, 1H), 7.59 (s, 1H), 7.32 (d, *J* = 6.9 Hz, 5H), 7.27 (d, *J* = 7.0 Hz, 1H), 7.07 (s, 1H), 6.03 (d, *J* = 9.4 Hz, 1H), 5.99 (s, 1H), 4.41 (t, *J* = 8.6 Hz, 1H), 4.31 (q, *J* = 9.4, 8.3 Hz, 3H), 3.54-3.44 (m, 2H), 3.19-3.12 (m, 1H), 3.05 (d, *J* = 8.6 Hz, 1H), 2.57 (dd, *J* = 16.3, 7.8 Hz, 2H), 2.22 (dt, *J* = 14.5, 8.2 Hz, 1H), 1.98 (t, *J* = 13.2 Hz, 1H), 1.89 (d, *J* = 11.1 Hz, 1H), 1.65 (q, *J* = 10.3 Hz, 1H), 1.52 (t, *J* = 12.4 Hz, 1H), 1.20 (s, 9H), 0.92 (s, 9H). <sup>13</sup>C NMR (101 MHz, DMSO-*d*<sub>6</sub>) δ 179.43, 174.09, 171.83, 171.11, 157.52, 140.19, 129.01, 127.65, 127.36, 60.74, 57.09, 54.91, 50.87, 49.42, 43.50, 37.78, 36.72, 35.66, 34.72, 29.76, 28.09, 26.77. ESI-HRMS Calcd for C<sub>29</sub>H<sub>45</sub>N<sub>6</sub>O<sub>5</sub> [M+H]<sup>+</sup>: 557.3446, found 557.3444.

***(2S,4R)-1-((S)-2-(3-(tert-butyl)ureido)-3,3-dimethylbutanoyl)-N-((S)-1-cyano-2-((S)-2-oxopyrrolidin-3-yl)ethyl)-4-phenylpyrrolidine-2-carboxamide (5)***. Compound **5** was prepared according to the procedure of compound **2**, white solid, yield: 32%. <sup>1</sup>H NMR (500 MHz, DMSO-*d*<sub>6</sub>) δ 9.00 (d, *J* = 8.7 Hz, 1H), 7.64 (s, 1H), 7.35 (d, *J* = 5.7 Hz, 4H), 7.27 (td, *J* = 5.9, 3.2 Hz, 1H), 6.00 (d, *J* = 9.5 Hz, 1H), 5.98 (s, 1H), 4.99 (ddd, *J* = 11.4, 8.7, 4.6 Hz, 1H), 4.37-4.23 (m, 3H), 3.45 (dd, *J* = 6.4, 3.6 Hz, 2H), 3.15 (t, *J* = 9.1 Hz, 1H), 3.04 (td, *J* = 9.3, 7.1 Hz, 1H), 2.56 (td, *J* = 10.9, 10.2, 4.6 Hz, 2H), 2.25-2.07 (m, 2H), 1.89 (q, *J* = 11.1 Hz, 1H), 1.79-1.63 (m, 2H), 1.20 (s, 9H), 0.91 (s, 9H). <sup>13</sup>C NMR (126 MHz, DMSO-*d*<sub>6</sub>) δ 178.17, 171.96, 171.22, 157.53, 140.00, 129.04, 127.68, 127.43, 120.25, 60.48, 57.12, 54.78, 49.44, 43.51, 38.02, 37.06, 36.58, 35.59, 34.92, 29.77, 27.41, 26.74. ESI-HRMS Calcd for C<sub>29</sub>H<sub>43</sub>N<sub>6</sub>O<sub>4</sub> [M+H]<sup>+</sup>: 539.3340, found 539.3352. HPLC purity 95.1% (Rt = 11.808 min, Method B).

**Methyl (2S,4S)-1-((S)-2-(3-(tert-butyl)ureido)-3,3-dimethylbutanoyl)-4-(phenylthio)pyrrolidine-2-carboxylate (S14a).** Compound **S14a** was prepared according to the procedure of compound **S3**, white solid, yield: 97%. <sup>1</sup>H NMR (400 MHz, DMSO-*d*<sub>6</sub>) δ 7.42 (d, *J* = 7.6 Hz, 2H), 7.36 (t, *J* = 7.3 Hz, 2H), 7.31-7.24 (m, 1H), 5.99 (d, *J* = 10.0 Hz, 2H), 4.41 (dt, *J* = 17.5, 8.2 Hz, 2H), 4.21 (d, *J* = 9.3 Hz, 1H), 3.96 (t, *J* = 7.6 Hz, 1H), 3.61 (d, *J* = 2.1 Hz, 3H), 3.41 (t, *J* = 9.4 Hz, 1H), 2.62 (d, *J* = 7.3 Hz, 1H), 1.79 (dd, *J* = 13.1, 7.6 Hz, 1H), 1.19 (s, 9H), 0.91 (s, 9H). <sup>13</sup>C NMR (101 MHz, DMSO-*d*<sub>6</sub>) δ 171.85, 171.45, 157.44, 134.45, 130.62, 129.70, 127.40, 58.27, 56.97, 53.60, 52.23, 49.47, 43.20, 35.56, 35.34, 29.72, 26.61. ESI-HRMS Calcd for C<sub>23</sub>H<sub>36</sub>N<sub>3</sub>O<sub>4</sub>S [M+H]<sup>+</sup>: 450.2421, found 450.2421.

**(2S)-1-((S)-2-(3-(tert-butyl)ureido)-3,3-dimethylbutanoyl)-4-(phenylthio)pyrrolidine-2-carboxylic acid (S15a).** Compound **S15a** was prepared according to the procedure of compound **S4**, white solid, yield: 93%. <sup>1</sup>H NMR (400 MHz, DMSO-*d*<sub>6</sub>) δ 12.57 (s, 1H), 7.43 (d, *J* = 7.7 Hz, 2H), 7.35 (t, *J* = 7.5 Hz, 2H), 7.28 (d, *J* = 7.3 Hz, 1H), 6.00 (d, *J* = 11.1 Hz, 2H), 4.39 (t, *J* = 8.9 Hz, 1H), 4.30 (t, *J* = 8.1 Hz, 1H), 4.21 (d, *J* = 9.3 Hz, 1H), 3.91 (t, *J* = 8.0 Hz, 1H), 3.39 (s, 1H), 2.67 (dd, *J* = 12.0, 5.8 Hz, 1H), 1.76 (q, *J* = 10.0 Hz, 1H), 1.20 (s, 9H), 0.91 (s, 9H). <sup>13</sup>C NMR (101 MHz, DMSO-*d*<sub>6</sub>) δ 172.97, 171.24, 157.46, 134.52, 130.54, 129.69, 127.32, 58.55, 56.96, 53.78, 49.46, 43.00, 35.76, 35.47, 29.74, 26.67. ESI-HRMS Calcd for C<sub>22</sub>H<sub>33</sub>N<sub>3</sub>NaO<sub>4</sub>S [M+Na]<sup>+</sup>: 458.2084, found 458.2084.

**(2S,4S)-N-((S)-1-amino-1-oxo-3-((S)-2-oxopyrrolidin-3-yl)propan-2-yl)-1-((S)-2-(3-(tert-butyl)ureido)-3,3-dimethylbutanoyl)-4-(phenylthio)pyrrolidine-2-carboxamide (S16a).** Compound **S16a** was prepared according to the procedure of compound **S3**, white solid, yield: 98%. <sup>1</sup>H NMR (500 MHz, DMSO-*d*<sub>6</sub>) δ 8.21 (d, *J* = 9.0 Hz, 1H), 7.55 (s, 1H), 7.47 (d, *J* = 1.5 Hz, 1H), 7.46 (t, *J* = 1.2 Hz, 1H), 7.36 (t, *J* = 7.6 Hz, 2H), 7.33 (d, *J* = 2.1 Hz, 1H), 7.31-7.26 (m, 1H), 7.05 (d, *J* = 2.0 Hz, 1H), 6.02 (d, *J* = 9.4 Hz, 1H), 5.96 (s, 1H), 4.36 (td, *J* = 9.6, 7.3 Hz, 2H), 4.28 (ddd, *J* = 12.3, 8.9, 3.4 Hz, 1H), 4.18 (d, *J* = 9.4 Hz, 1H), 3.87 (tt, *J* = 10.8, 6.8 Hz, 1H), 3.13 (t, *J* = 9.1 Hz, 1H), 3.02 (td, *J* = 9.3, 7.1 Hz, 1H), 2.61-2.51 (m, 2H), 2.22-2.14 (m, 1H), 1.98-1.91 (m, 1H), 1.74-1.61 (m, 2H), 1.50-1.44 (m, 1H), 1.20 (s, 10H), 0.89 (s, 9H). <sup>13</sup>C NMR (126 MHz, DMSO-*d*<sub>6</sub>) δ 179.26, 173.95, 171.12, 162.78, 157.54, 134.47, 130.73, 129.69, 127.37, 59.90, 57.16, 54.21, 50.80, 49.45, 42.85, 38.72, 37.69, 36.31, 35.48, 34.79, 29.74, 28.00, 26.72. ESI-HRMS Calcd for C<sub>29</sub>H<sub>45</sub>N<sub>6</sub>O<sub>5</sub>S [M+H]<sup>+</sup>: 589.3167, found 589.3166.

**(2S,4S)-1-((S)-2-(3-(tert-butyl)ureido)-3,3-dimethylbutanoyl)-N-((S)-1-cyano-2-((S)-2-oxopyrrolidin-3-yl)ethyl)-4-(phenylthio)pyrrolidine-2-carboxamide (6).** Compound **6** was prepared according to the procedure of compound **2**, white solid, yield: 46%. <sup>1</sup>H NMR (500 MHz, DMSO-*d*<sub>6</sub>) δ 8.98 (d, *J* = 8.8 Hz, 1H), 7.66 (s, 1H), 7.48 (d, *J* = 7.4 Hz, 2H), 7.37 (t, *J* = 7.6 Hz, 2H), 7.30 (d, *J* = 7.2 Hz, 1H), 6.00 (d, *J* = 9.4 Hz, 1H),

5.95 (s, 1H), 4.96 (ddd,  $J = 11.5, 8.7, 4.6$  Hz, 1H), 4.38 (dd,  $J = 10.0, 7.3$  Hz, 1H), 4.23 (dd,  $J = 9.6, 7.3$  Hz, 1H), 4.17 (d,  $J = 9.4$  Hz, 1H), 3.92 (td,  $J = 8.9, 7.1, 3.9$  Hz, 1H), 3.37 (d,  $J = 10.1$  Hz, 1H), 3.14 (t,  $J = 9.1$  Hz, 1H), 3.03 (dd,  $J = 9.3, 7.2$  Hz, 1H), 2.55 (dd,  $J = 12.9, 6.8$  Hz, 1H), 2.18 (ddd,  $J = 13.4, 11.3, 4.1$  Hz, 1H), 2.09 (dt,  $J = 14.8, 7.7$  Hz, 1H), 1.75-1.65 (m, 3H), 1.23 (d,  $J = 14.5$  Hz, 1H), 1.20 (s, 9H), 0.88 (s, 9H).  $^{13}\text{C}$  NMR (126 MHz, DMSO- $d_6$ )  $\delta$  178.10, 171.27, 171.17, 157.53, 134.26, 130.93, 129.70, 127.49, 120.15, 59.67, 57.15, 54.10, 49.46, 42.84, 38.09, 37.05, 36.31, 35.43, 34.84, 29.74, 27.38, 26.67. ESI-HRMS Calcd for  $\text{C}_{29}\text{H}_{43}\text{N}_6\text{O}_4\text{S}$   $[\text{M}+\text{H}]^+$ : 571.3061, found 571.3061. HPLC purity 98.5% ( $R_t = 13.916$  min, Method B).

**Methyl (S)-7-((S)-2-(3-(tert-butyl)ureido)-3,3-dimethylbutanoyl)-1,4-dithia-7-azaspiro[4.4]nonane-8-carboxylate (S14b)**. Compound **S1** (770 mg, 3.3 mmol) and compound **S13b** (1 g, 3.3 mmol) were dissolved in DCM/DMF (V:V=1:1, 20 mL) under  $\text{N}_2$  atmosphere. Then NMM (860 mg, 8.5 mmol), BOP (1.77 g, 4.0 mmol) were added to the reaction at 25 °C and stirred for 12 h. Then DCM (20 mL) and 1N HCl aqueous solution (5 mL) were added to the reaction. After separation, the organic phase was washed with water (5 mL), the organic phase was washed with saturated brine (5 mL), dried over anhydrous sodium sulphate, evaporated in vacuum and purified by column chromatography to give the compound **S14b** as white solid (945 mg, yield: 66%).  $^1\text{H}$  NMR (400 MHz, DMSO- $d_6$ )  $\delta$  5.97 (d,  $J = 11.1$  Hz, 1H), 4.41-4.27 (m, 2H), 4.25-4.18 (m, 1H), 3.91 (d,  $J = 10.8$  Hz, 1H), 3.62 (s, 3H), 3.37 (tt,  $J = 8.2, 4.3$  Hz, 4H), 2.70 (dd,  $J = 13.4, 7.9$  Hz, 1H), 2.38 (dd,  $J = 13.2, 8.4$  Hz, 1H), 1.19 (s, 9H), 0.92 (s, 9H).  $^{13}\text{C}$  NMR (101 MHz, DMSO- $d_6$ )  $\delta$  171.55, 171.30, 157.31, 67.44, 61.65, 58.92, 56.78, 52.34, 49.44, 44.53, 39.12, 35.34, 29.70, 26.58. ESI-HRMS Calcd for  $\text{C}_{19}\text{H}_{33}\text{N}_3\text{NaO}_4\text{S}_2$   $[\text{M}+\text{Na}]^+$ : 454.1805, found 454.1804.

**(S)-7-((S)-2-(3-(tert-butyl)ureido)-3,3-dimethylbutanoyl)-1,4-dithia-7-azaspiro[4.4]nonane-8-carboxylic acid (S15b)**. Compound **S15b** was prepared according to the procedure of compound **S4**, white solid, yield: 95%.  $^1\text{H}$  NMR (400 MHz, DMSO- $d_6$ )  $\delta$  12.58 (s, 1H), 6.01-5.93 (m, 2H), 4.33-4.19 (m, 3H), 3.87 (d,  $J = 10.9$  Hz, 1H), 3.37 (td,  $J = 5.5, 4.8, 2.1$  Hz, 3H), 2.68 (ddd,  $J = 13.2, 7.7, 1.3$  Hz, 1H), 2.50 (p,  $J = 1.9$  Hz, 1H), 2.34 (dd,  $J = 13.1, 8.8$  Hz, 1H), 1.19 (s, 9H), 0.91 (s, 9H).  $^{13}\text{C}$  NMR (101 MHz, DMSO- $d_6$ )  $\delta$  172.32, 171.43, 157.37, 67.50, 61.77, 59.16, 56.82, 49.48, 44.69, 39.07, 35.46, 29.71, 26.64. ESI-HRMS Calcd for  $\text{C}_{18}\text{H}_{31}\text{N}_3\text{NaO}_4\text{S}_2$   $[\text{M}+\text{Na}]^+$ : 440.1648, found 440.1646.

**(S)-N-((S)-1-amino-1-oxo-3-((S)-2-oxopyrrolidin-3-yl)propan-2-yl)-7-((S)-2-(3-(tert-butyl)ureido)-3,3-dimethylbutanoyl)-1,4-dithia-7-azaspiro[4.4]nonane-8-carboxamide (S16b)**. Compound **S16b** was prepared according to the procedure of compound **S3**, white solid, yield: 60%.  $^1\text{H}$  NMR (400 MHz, DMSO- $d_6$ )  $\delta$  8.29 (d,  $J =$

8.8 Hz, 1H), 7.53 (s, 1H), 7.25 (s, 1H), 7.01 (s, 1H), 6.02-5.88 (m, 2H), 4.45-4.07 (m, 4H), 3.82 (d,  $J = 10.7$  Hz, 1H), 3.37 (t,  $J = 7.2$  Hz, 5H), 3.13 (t,  $J = 9.1$  Hz, 1H), 3.04 (t,  $J = 8.5$  Hz, 1H), 2.61-2.53 (m, 1H), 2.33-2.23 (m, 1H), 2.17 (p,  $J = 7.7$  Hz, 1H), 2.00-1.86 (m, 1H), 1.62 (p,  $J = 9.8$  Hz, 1H), 1.50 (t,  $J = 11.8$  Hz, 1H), 1.19 (s, 9H), 0.89 (s, 9H).  $^{13}\text{C}$  NMR (101 MHz, DMSO- $d_6$ )  $\delta$  179.26, 173.90, 171.30, 170.66, 157.46, 67.54, 62.25, 60.57, 57.03, 50.93, 49.47, 45.01, 39.02, 37.72, 35.45, 34.57, 29.70, 27.98, 26.70. ESI-HRMS Calcd for  $\text{C}_{25}\text{H}_{43}\text{N}_6\text{O}_5\text{S}_2$   $[\text{M}+\text{H}]^+$ : 571.2731, found 571.2731.

***(S)*-7-((*S*)-2-(3-(*tert*-butyl)ureido)-3,3-dimethylbutanoyl)-*N*-((*S*)-1-cyano-2-((*S*)-2-oxopyrrolidin-3-yl)ethyl)-1,4-dithia-7-azaspiro[4.4]nonane-8-carboxamide (7).**

Compound **7** was prepared according to the procedure of compound **2**, white solid, yield: 30%.  $^1\text{H}$  NMR (400 MHz, DMSO- $d_6$ )  $\delta$  8.99 (d,  $J = 8.6$  Hz, 1H), 7.64 (s, 1H), 6.01-5.89 (m, 2H), 4.95 (s, 1H), 4.38-4.21 (m, 2H), 4.17 (d,  $J = 9.6$  Hz, 1H), 3.87 (d,  $J = 10.7$  Hz, 1H), 3.38 (s, 5H), 3.18-3.01 (m, 2H), 2.58 (d,  $J = 11.4$  Hz, 1H), 2.28 (t,  $J = 11.4$  Hz, 1H), 2.15 (d,  $J = 14.4$  Hz, 2H), 1.68 (d,  $J = 13.1$  Hz, 2H), 1.19 (s, 9H), 0.88 (s, 9H).  $^{13}\text{C}$  NMR (101 MHz, DMSO- $d_6$ )  $\delta$  178.09, 171.45, 170.73, 157.49, 120.07, 67.55, 61.75, 60.32, 57.07, 49.49, 45.24, 39.03, 38.18, 37.09, 35.33, 34.77, 29.69, 27.38, 26.66. ESI-HRMS Calcd for  $\text{C}_{25}\text{H}_{41}\text{N}_6\text{O}_4\text{S}_2$   $[\text{M}+\text{H}]^+$ : 553.2625, found 553.2629. HPLC purity 99.6% ( $R_t = 9.579$  min, Method B).

***Ethyl (1*S*,3*aR*,6*aS*)-2-((*S*)-2-(3-(*tert*-butyl)ureido)-3,3-dimethylbutanoyl)-octahydrocyclopenta[*c*]pyrrole-1-carboxylate (S14c).*** Compound **S14c** was prepared according to the procedure of compound **S3**, white solid, yield: 88%.  $^1\text{H}$  NMR (500 MHz, DMSO- $d_6$ )  $\delta$  5.98 (s, 1H), 5.91 (d,  $J = 9.8$  Hz, 1H), 4.26 (d,  $J = 9.9$  Hz, 1H), 4.12 (d,  $J = 4.3$  Hz, 1H), 4.07 (dtt,  $J = 15.0, 7.1, 3.6$  Hz, 2H), 3.82 (dd,  $J = 10.6, 3.4$  Hz, 1H), 3.71 (dd,  $J = 10.5, 7.5$  Hz, 1H), 2.71-2.63 (m, 1H), 2.57 (dq,  $J = 7.8, 4.0$  Hz, 1H), 1.89-1.80 (m, 1H), 1.80-1.72 (m, 1H), 1.67-1.58 (m, 1H), 1.58-1.41 (m, 3H), 1.19 (s, 9H), 1.17 (d,  $J = 2.1$  Hz, 3H), 0.91 (s, 9H).  $^{13}\text{C}$  NMR (101 MHz, DMSO- $d_6$ )  $\delta$  171.65, 171.23, 157.21, 64.55, 60.36, 56.26, 53.13, 49.00, 46.84, 42.62, 34.43, 32.20, 31.25, 29.16, 26.29, 24.64, 14.04. ESI-HRMS Calcd for  $\text{C}_{21}\text{H}_{38}\text{N}_3\text{O}_4$   $[\text{M}+\text{H}]^+$ : 396.2857, found 396.2860.

***(1*S*,3*aR*,6*aS*)-2-((*S*)-2-(3-(*tert*-butyl)ureido)-3,3-dimethylbutanoyl)octahydrocyclopenta[*c*]pyrrole-1-carboxylic acid (S15c).***

Compound **S15c** was prepared according to the procedure of compound **S4**, white solid, yield: 99%.  $^1\text{H}$  NMR (500 MHz, DMSO- $d_6$ )  $\delta$  12.41 (s, 1H), 5.99 (s, 1H), 5.91 (d,  $J = 9.9$  Hz, 1H), 4.26 (d,  $J = 9.8$  Hz, 1H), 4.08 (d,  $J = 4.1$  Hz, 1H), 3.80 (dd,  $J = 10.7, 3.2$  Hz, 1H), 3.70 (dd,  $J = 10.5, 7.5$  Hz, 1H), 2.71-2.63 (m, 1H), 2.59 (dq,  $J = 7.9, 4.0$  Hz, 1H), 1.85 (dt,  $J = 12.6, 7.6$  Hz, 1H), 1.77 (dt,  $J = 12.8, 7.8$  Hz, 1H), 1.62 (dt,  $J = 12.4, 7.0$  Hz, 1H), 1.52 (ddd,  $J = 18.0, 8.3, 5.3$  Hz, 2H), 1.44 (td,  $J = 13.2, 12.6, 6.1$  Hz, 1H), 1.20 (s, 9H), 0.92 (s, 9H).  $^{13}\text{C}$  NMR (101 MHz, DMSO- $d_6$ )  $\delta$  173.46, 171.26, 157.43,

64.70, 56.38, 53.32, 49.17, 47.03, 42.70, 34.68, 32.60, 31.51, 29.30, 26.45, 24.83. ESI-HRMS Calcd for C<sub>19</sub>H<sub>34</sub>N<sub>3</sub>O<sub>4</sub> [M+H]<sup>+</sup>: 368.2544, found 368.2546.

**(1*S*,3*aR*,6*aS*)-*N*-((*S*)-1-amino-1-oxo-3-((*S*)-2-oxopyrrolidin-3-yl)propan-2-yl)-2-((*S*)-2-(3-(*tert*-butyl)ureido)-3,3-dimethylbutanoyl)octahydrocyclopenta[*c*]pyrrole-1-carboxamide (S16c).** Compound **S16c** was prepared according to the procedure of compound **S3**, white solid, yield: 73%. <sup>1</sup>H NMR (400 MHz, DMSO-*d*<sub>6</sub>) δ 8.13 (d, *J* = 8.8 Hz, 1H), 7.55 (s, 1H), 7.24 (s, 1H), 7.03 (s, 1H), 5.95 (s, 1H), 5.90 (d, *J* = 9.8 Hz, 1H), 4.23 (t, *J* = 11.8 Hz, 2H), 4.11 (d, *J* = 4.6 Hz, 1H), 3.74 (t, *J* = 5.5 Hz, 2H), 3.12 (t, *J* = 9.1 Hz, 1H), 3.04 (d, *J* = 8.7 Hz, 1H), 2.88 (s, 2H), 2.72 (s, 2H), 2.14 (dt, *J* = 14.6, 8.0 Hz, 1H), 1.95 (t, *J* = 12.9 Hz, 1H), 1.75 (d, *J* = 7.0 Hz, 2H), 1.62 (s, 3H), 1.48-1.36 (m, 2H), 1.18 (s, 9H), 0.89 (s, 9H). <sup>13</sup>C NMR (101 MHz, DMSO-*d*<sub>6</sub>) δ 178.82, 173.68, 171.82, 162.39, 157.35, 65.52, 56.48, 53.72, 50.42, 49.03, 47.30, 42.85, 38.31, 37.38, 35.86, 34.61, 31.53, 31.12, 29.23, 27.55, 26.44, 24.53. ESI-HRMS Calcd for C<sub>26</sub>H<sub>45</sub>N<sub>6</sub>O<sub>5</sub> [M+H]<sup>+</sup>: 521.3446, found 521.3455.

**(1*S*,3*aR*,6*aS*)-2-((*S*)-2-(3-(*tert*-butyl)ureido)-3,3-dimethylbutanoyl)-*N*-((*S*)-1-cyano-2-((*S*)-2-oxopyrrolidin-3-yl)ethyl)octahydrocyclopenta[*c*]pyrrole-1-carboxamide (8).** Compound **8** was prepared according to the procedure of compound **2**, white solid, yield: 41%. <sup>1</sup>H NMR (400 MHz, DMSO-*d*<sub>6</sub>) δ 8.87 (d, *J* = 8.6 Hz, 1H), 7.64 (s, 1H), 5.94 (s, 1H), 5.88 (d, *J* = 9.7 Hz, 1H), 4.94 (td, *J* = 10.4, 9.2, 5.1 Hz, 1H), 4.20 (d, *J* = 9.7 Hz, 1H), 3.99 (d, *J* = 4.8 Hz, 1H), 3.77 (d, *J* = 5.0 Hz, 2H), 3.14 (t, *J* = 9.2 Hz, 1H), 3.03 (d, *J* = 8.6 Hz, 1H), 2.77-2.60 (m, 1H), 2.49-2.43 (m, 2H), 2.17 (ddd, *J* = 19.2, 10.8, 5.3 Hz, 1H), 2.08 (q, *J* = 6.5, 5.2 Hz, 1H), 1.80 (q, *J* = 6.4 Hz, 2H), 1.66 (dtd, *J* = 23.1, 15.0, 6.7 Hz, 5H), 1.45-1.37 (m, 1H), 1.18 (d, *J* = 2.0 Hz, 9H), 0.89 (s, 9H). <sup>13</sup>C NMR (126 MHz, DMSO-*d*<sub>6</sub>) δ 178.08, 172.36, 171.59, 157.78, 120.26, 65.79, 56.95, 54.09, 49.45, 47.85, 43.47, 38.04, 37.10, 34.92, 34.70, 31.85, 31.42, 29.64, 27.35, 26.81, 24.93. ESI-HRMS Calcd for C<sub>26</sub>H<sub>43</sub>N<sub>6</sub>O<sub>4</sub> [M+H]<sup>+</sup>: 503.3340, found 503.3352. HPLC purity 99.5% (Rt = 8.844 min, Method B).

**Methyl (S)-7-((S)-2-((*tert*-butoxycarbonyl)amino)-3,3-dimethylbutanoyl)-1,4-dithia-7-azaspiro[4.4]nonane-8-carboxylate (S18).** Compound **S18** was prepared according to the procedure of compound **S14b**, white solid, yield: 60%. <sup>1</sup>H NMR (400 MHz, DMSO-*d*<sub>6</sub>) δ 6.71 (d, *J* = 9.3 Hz, 1H), 4.39 (t, *J* = 8.2 Hz, 1H), 4.25 (d, *J* = 10.9 Hz, 1H), 4.15-4.06 (m, 1H), 3.93 (t, *J* = 10.6 Hz, 1H), 3.63 (s, 3H), 3.38 (dd, *J* = 6.1, 3.3 Hz, 4H), 2.70 (dt, *J* = 12.2, 6.0 Hz, 1H), 2.38 (dd, *J* = 13.2, 8.4 Hz, 1H), 1.38 (s, 9H), 0.95 (s, 9H). <sup>13</sup>C NMR (101 MHz, DMSO-*d*<sub>6</sub>) δ 171.27, 170.52, 156.10, 78.72, 67.48, 61.71, 59.02, 58.86, 52.37, 44.46, 39.15, 35.20, 28.63, 26.60. ESI-HRMS Calcd for C<sub>19</sub>H<sub>33</sub>N<sub>2</sub>O<sub>5</sub>S<sub>2</sub> [M+H]<sup>+</sup>: 433.1825, found 433.1833.

**(S)-7-((S)-2-((tert-butoxycarbonyl)amino)-3,3-dimethylbutanoyl)-1,4-dithia-7-azaspiro[4.4]nonane-8-carboxylic acid (S19).** Compound **S19** was prepared according to the procedure of compound **S4**, white solid, yield: 83%. <sup>1</sup>H NMR (400 MHz, DMSO-*d*<sub>6</sub>) δ 12.61 (s, 1H), 6.67 (d, *J* = 9.4 Hz, 1H), 4.33-4.18 (m, 2H), 4.11 (d, *J* = 9.4 Hz, 1H), 3.88 (d, *J* = 10.9 Hz, 1H), 3.37-3.28 (m, 4H), 2.69 (dd, *J* = 13.1, 7.9 Hz, 1H), 2.34 (dd, *J* = 13.1, 8.9 Hz, 1H), 1.37 (s, 9H), 0.94 (s, 9H). <sup>13</sup>C NMR (101 MHz, DMSO-*d*<sub>6</sub>) δ 172.30, 170.37, 156.07, 78.68, 67.55, 61.84, 59.25, 58.82, 44.63, 39.09, 35.30, 28.63, 26.64. ESI-HRMS Calcd for C<sub>18</sub>H<sub>31</sub>N<sub>2</sub>O<sub>5</sub>S<sub>2</sub> [M+H]<sup>+</sup>: 419.1669, found 419.1669.

**Tert-butyl ((S)-1-((S)-8-(((S)-1-amino-1-oxo-3-((S)-2-oxopyrrolidin-3-yl)propan-2-yl)carbamoyl)-1,4-dithia-7-azaspiro[4.4]nonan-7-yl)-3,3-dimethyl-1-oxobutan-2-yl)carbamate (S20).** Compound **S20** was prepared according to the procedure of compound **S3**, white solid, yield: 40%. <sup>1</sup>H NMR (400 MHz, DMSO-*d*<sub>6</sub>) δ 8.30 (d, *J* = 8.7 Hz, 1H), 7.55 (s, 1H), 7.25 (s, 1H), 7.02 (s, 1H), 6.71 (d, *J* = 9.5 Hz, 1H), 4.40 (dd, *J* = 9.9, 7.1 Hz, 1H), 4.32-4.20 (m, 2H), 4.08 (d, *J* = 9.5 Hz, 1H), 3.83 (d, *J* = 10.7 Hz, 1H), 3.42-3.35 (m, 4H), 3.17-2.99 (m, 2H), 2.58 (dd, *J* = 13.0, 7.2 Hz, 1H), 2.48 (dd, *J* = 14.4, 9.4 Hz, 1H), 2.27 (dd, *J* = 13.0, 10.0 Hz, 1H), 2.16 (dt, *J* = 14.0, 7.6 Hz, 1H), 1.94 (td, *J* = 13.1, 3.7 Hz, 1H), 1.61 (dq, *J* = 11.8, 9.3 Hz, 1H), 1.49 (ddd, *J* = 14.4, 11.6, 3.6 Hz, 1H), 1.37 (s, 9H), 0.91 (s, 9H). <sup>13</sup>C NMR (101 MHz, DMSO-*d*<sub>6</sub>) δ 179.24, 173.93, 170.67, 170.27, 156.15, 78.64, 67.57, 62.28, 60.52, 58.92, 50.96, 44.96, 39.01, 37.77, 35.22, 34.46, 28.61, 27.97, 26.67. ESI-HRMS Calcd for C<sub>25</sub>H<sub>42</sub>N<sub>5</sub>O<sub>6</sub>S<sub>2</sub> [M+H]<sup>+</sup>: 572.2571, found 572.2580.

**(S)-N-((S)-1-cyano-2-((S)-2-oxopyrrolidin-3-yl)ethyl)-7-((S)-3,3-dimethyl-2-(2,2,2-trifluoroacetamido)butanoyl)-1,4-dithia-7-azaspiro[4.4]nonane-8-carboxamide (9).** Compound **S20** (400 mg, 0.7 mmol) and 4 M HCl in 1,4-dioxane (2 mL) were dissolved in 1,4-dioxane (2 mL), the reaction was stirred at 25 °C for 2 h. Then the reaction was concentrated to remove the solvent and Et<sub>3</sub>N (225 mg, 2.2 mmol), trifluoroacetic anhydride (165 mg, 0.8 mmol), DCM (4 mL) were added to the reaction at 0 °C. The reaction was allowed to warm to 25 °C and stirred for 10 h. Then DCM (10 mL) and 1N HCl aqueous solution (3 mL) were added to the reaction. After separation, the organic phase was washed with water (5 mL), the organic phase was washed with saturated brine (5 mL), dried over anhydrous sodium sulphate, evaporated in vacuum and purified by column chromatography to give **9** as white solid (154 mg, yield: 40%). <sup>1</sup>H NMR (400 MHz, DMSO-*d*<sub>6</sub>) δ 9.44 (d, *J* = 8.6 Hz, 1H), 9.04 (d, *J* = 8.5 Hz, 1H), 7.66 (s, 1H), 4.96 (dq, *J* = 8.9, 4.8 Hz, 1H), 4.57-4.47 (m, 1H), 4.33 (dd, *J* = 9.9, 7.1 Hz, 1H), 4.19 (d, *J* = 10.9 Hz, 1H), 3.91 (d, *J* = 10.9 Hz, 1H), 3.40 (tt, *J* = 13.0, 6.1 Hz, 4H), 3.14 (t, *J* = 9.3 Hz, 1H), 3.05 (q, *J* = 8.7 Hz, 1H), 2.61 (dd, *J* = 13.0, 7.1 Hz, 1H), 2.47 (d, *J* = 9.0 Hz, 1H), 2.30 (dd, *J* = 12.9, 10.0 Hz, 1H), 2.13 (ddt, *J* = 18.2, 13.5, 5.9

Hz, 2H), 1.78-1.65 (m, 2H), 0.98 (s, 9H). <sup>13</sup>C NMR (101 MHz, DMSO-*d*<sub>6</sub>) δ 178.04, 170.51, 168.22, 157.04, 119.98, 117.75, 67.48, 62.43, 60.40, 58.45, 44.99, 39.18, 38.29, 37.18, 35.57, 34.77, 27.37, 26.55. <sup>19</sup>F NMR (376 MHz, DMSO-*d*<sub>6</sub>) δ -72.93. ESI-HRMS Calcd for C<sub>22</sub>H<sub>31</sub>F<sub>3</sub>N<sub>5</sub>O<sub>4</sub>S<sub>2</sub> [M+H]<sup>+</sup>: 550.1764, found 550.1766. HPLC purity 99.9% (Rt = 11.336 min, Method D).

**Methyl (S)-7-((S)-2-(1-fluorocyclopropane-1-carboxamido)-3,3-dimethylbutanoyl)-1,4-dithia-7-azaspiro[4.4]nonane-8-carboxylate (S21).** Compound **S18** (540 mg, 1.2 mmol) and 4 M HCl in 1,4-dioxane (4 mL) were dissolved in 1,4-dioxane (4 mL), and stirred at 25 °C for 2 h. The reaction was concentrated to remove the solvent. Then 1-Fluoro-cyclopropanecarboxylic acid (130 mg, 1.2 mmol), HATU (712 mg, 1.9 mmol), DCM (8 mL) were added to the reaction and stirred at 25 °C for 1 h. Then DIPEA (340 mg, 2.6 mmol) was added to the reaction and stirred at 25 °C for 10 h. Then DCM (10 mL) and 1N HCl aqueous solution (5 mL) were added to the reaction. After separation, the organic phase was washed with water (5 mL), the organic phase was washed with saturated brine (5 mL), dried over anhydrous sodium sulphate, evaporated in vacuum and purified by column chromatography to give the compound **S21** as white solid (468 mg, yield: 90%). <sup>1</sup>H NMR (400 MHz, DMSO-*d*<sub>6</sub>) δ 7.37-7.31 (m, 1H), 4.57 (d, *J* = 9.0 Hz, 1H), 4.47 (t, *J* = 8.0 Hz, 1H), 4.18 (d, *J* = 11.0 Hz, 1H), 3.95 (d, *J* = 10.9 Hz, 1H), 3.61 (d, *J* = 22.1 Hz, 3H), 3.37 (d, *J* = 5.9 Hz, 4H), 2.72 (dd, *J* = 13.3, 8.3 Hz, 1H), 2.42 (dd, *J* = 13.3, 7.8 Hz, 1H), 1.40-1.30 (m, 2H), 1.18 (td, *J* = 8.6, 4.0 Hz, 2H), 0.99 (s, 9H). <sup>13</sup>C NMR (101 MHz, DMSO-*d*<sub>6</sub>) δ 171.11, 169.51, 168.95, 79.58, 67.38, 62.19, 59.06, 57.06, 52.46, 44.20, 39.32, 35.96, 26.50, 13.38. ESI-HRMS Calcd for C<sub>18</sub>H<sub>28</sub>FN<sub>2</sub>O<sub>4</sub>S<sub>2</sub> [M+H]<sup>+</sup>: 419.1469, found 419.1472.

**(S)-7-((S)-2-(1-fluorocyclopropane-1-carboxamido)-3,3-dimethylbutanoyl)-1,4-dithia-7-azaspiro[4.4]nonane-8-carboxylic acid (S22).** Compound **S22** was prepared according to the procedure of compound **S4**, white solid, yield: 74%. <sup>1</sup>H NMR (400 MHz, DMSO-*d*<sub>6</sub>) δ 12.74 (s, 1H), 7.33 (dd, *J* = 9.2, 2.8 Hz, 1H), 4.56 (d, *J* = 9.0 Hz, 1H), 4.35 (t, *J* = 8.2 Hz, 1H), 4.18 (d, *J* = 11.0 Hz, 1H), 3.92 (d, *J* = 11.0 Hz, 1H), 3.37 (dd, *J* = 5.6, 3.6 Hz, 4H), 2.71 (dd, *J* = 13.2, 8.2 Hz, 1H), 2.38 (dd, *J* = 13.2, 8.3 Hz, 1H), 1.42-1.29 (m, 2H), 1.21-1.14 (m, 2H), 0.99 (s, 9H). <sup>13</sup>C NMR (101 MHz, DMSO-*d*<sub>6</sub>) δ 172.10, 169.36, 168.68, 79.60, 67.44, 62.36, 59.27, 57.03, 44.35, 39.28, 36.07, 26.54, 13.38. ESI-HRMS Calcd for C<sub>17</sub>H<sub>26</sub>FN<sub>2</sub>O<sub>4</sub>S<sub>2</sub> [M+H]<sup>+</sup>: 405.1313, found 405.1320.

**(S)-N-((S)-1-amino-1-oxo-3-((S)-2-oxopyrrolidin-3-yl)propan-2-yl)-7-((S)-2-(1-fluorocyclopropane-1-carboxamido)-3,3-dimethylbutanoyl)-1,4-dithia-7-azaspiro[4.4]nonane-8-carboxamide (S23).** Compound **S23** was prepared according to the procedure of compound **S3**, white solid, yield: 60%. <sup>1</sup>H NMR (400 MHz, DMSO-*d*<sub>6</sub>) δ



8.32 (d,  $J = 8.7$  Hz, 1H), 7.55 (s, 1H), 7.38 (dd,  $J = 9.2, 2.7$  Hz, 1H), 7.31 (s, 1H), 7.05-6.97 (m, 1H), 4.60-4.42 (m, 2H), 4.33-4.15 (m, 2H), 3.83 (d,  $J = 10.9$  Hz, 1H), 3.66-3.51 (m,  $J = 6.2, 5.7$  Hz, 2H), 3.43-3.35 (m, 2H), 3.20-3.00 (m, 4H), 2.63-2.56 (m, 1H), 2.46-2.39 (m, 1H), 2.29 (dd,  $J = 13.1, 9.8$  Hz, 1H), 2.22-2.12 (m, 1H), 2.01-1.90 (m, 1H), 1.72-1.40 (m, 2H), 1.38-1.12 (m, 2H), 0.96 (s, 9H).  $^{13}\text{C}$  NMR (101 MHz, DMSO- $d_6$ )  $\delta$  179.12, 173.84, 170.48, 169.10, 168.76, 79.51, 67.46, 62.91, 60.48, 57.13, 53.79, 44.72, 42.06, 39.23, 37.83, 36.00, 34.53, 27.94, 26.57, 13.38. ESI-HRMS Calcd for  $\text{C}_{24}\text{H}_{37}\text{FN}_5\text{O}_5\text{S}_2$   $[\text{M}+\text{H}]^+$ : 558.2215, found 558.2211.

**(S)-N-((S)-1-cyano-2-((S)-2-oxopyrrolidin-3-yl)ethyl)-7-((S)-2-(1-fluorocyclopropane-1-carboxamido)-3,3-dimethylbutanoyl)-1,4-dithia-7-azaspiro[4.4]nonane-8-carboxamide (10)**. Compound **10** was prepared according to the procedure of compound **2**, white solid, yield: 41%.  $^1\text{H}$  NMR (400 MHz, DMSO- $d_6$ )  $\delta$  9.02 (d,  $J = 8.4$  Hz, 1H), 7.67 (s, 1H), 7.40 (dd,  $J = 9.1, 2.6$  Hz, 1H), 4.95 (ddd,  $J = 10.5, 6.7, 4.2$  Hz, 1H), 4.53 (d,  $J = 9.0$  Hz, 1H), 4.33 (dd,  $J = 9.8, 7.2$  Hz, 1H), 4.21 (d,  $J = 11.0$  Hz, 1H), 3.88 (d,  $J = 10.9$  Hz, 1H), 3.46-3.33 (m, 4H), 3.21-3.10 (m, 1H), 3.06 (td,  $J = 9.3, 7.0$  Hz, 1H), 2.67-2.56 (m, 1H), 2.49-2.39 (m, 1H), 2.30 (dd,  $J = 12.9, 9.8$  Hz, 1H), 2.14 (ddt,  $J = 16.5, 14.3, 6.9$  Hz, 2H), 1.71 (tdd,  $J = 14.9, 11.3, 7.1$  Hz, 2H), 1.42-1.26 (m, 2H), 1.26-1.12 (m, 2H), 0.96 (s, 9H).  $^{13}\text{C}$  NMR (101 MHz, DMSO- $d_6$ )  $\delta$  177.99, 170.53, 169.27, 168.83, 119.97, 79.48, 67.47, 62.45, 60.31, 57.20, 44.91, 39.24, 38.43, 37.26, 35.87, 34.56, 27.42, 26.55, 13.38.  $^{19}\text{F}$  NMR (376 MHz, DMSO- $d_6$ )  $\delta$  -75.06. ESI-HRMS Calcd for  $\text{C}_{24}\text{H}_{35}\text{FN}_5\text{O}_4\text{S}_2$   $[\text{M}+\text{H}]^+$ : 540.2109, found 540.2114. HPLC purity 98.9% (Rt = 8.212 min, Method B).

**(S)-N-((S)-1-amino-1-oxo-3-((S)-2-oxopyrrolidin-3-yl)propan-2-yl)-7-((S)-3,3-dimethyl-2-(methylsulfonamido)butanoyl)-1,4-dithia-7-azaspiro[4.4]nonane-8-carboxamide (S24)**. Compound **S20** (400 mg, 0.8 mmol) and 4 M HCl in 1,4-dioxane (2 mL) were dissolved in DCM (10 mL), the reaction was stirred at 25 °C for 2 h. The reaction was concentrated to remove the solvent. Then  $\text{Et}_3\text{N}$  (258 mg, 2.6 mmol), methanesulfonyl chloride (115 mg, 1.0 mmol) and DCM (4 mL) were added to the reaction at 0 °C. The reaction was allowed to warm to 25 °C and stirred for 1 h. Then DCM (10 mL) and 1N HCl aqueous solution (3 mL) were added to the reaction. After separation, the organic phase was washed with water (5 mL), the organic phase was washed with saturated brine (5 mL), dried over anhydrous sodium sulphate, evaporated in vacuum and purified by column chromatography to give the compound **S24** as white solid (170 mg, yield: 44%).  $^1\text{H}$  NMR (400 MHz, DMSO- $d_6$ )  $\delta$  8.34 (d,  $J = 9.0$  Hz, 1H), 7.53 (s, 1H), 7.30 (t,  $J = 5.1$  Hz, 2H), 7.02 (s, 1H), 4.49 (dd,  $J = 9.9, 7.1$  Hz, 1H), 4.29 (ddd,  $J = 12.3, 8.8, 2.9$  Hz, 1H), 4.17 (d,  $J = 11.1$  Hz, 1H), 3.92-3.75 (m, 2H), 3.49-3.41 (m, 1H), 3.35 (s, 3H), 3.09 (dt,  $J = 29.2, 8.9$  Hz, 2H), 2.84 (s, 3H), 2.61 (dd,  $J = 12.8,$

6.9 Hz, 1H), 2.53 (d,  $J = 2.1$  Hz, 1H), 2.30 (dd,  $J = 12.8, 9.8$  Hz, 1H), 2.18 (dd,  $J = 13.1, 7.1$  Hz, 1H), 1.96 (td,  $J = 13.2, 3.5$  Hz, 1H), 1.72-1.56 (m, 1H), 1.53-1.43 (m, 1H), 0.96 (s, 9H).  $^{13}\text{C}$  NMR (101 MHz, DMSO- $d_6$ )  $\delta$  179.19, 173.81, 170.52, 169.68, 67.62, 62.79, 61.36, 60.57, 55.38, 50.76, 44.55, 41.17, 39.00, 37.70, 35.79, 34.72, 27.89, 26.6. ESI-HRMS Calcd for  $\text{C}_{21}\text{H}_{36}\text{N}_5\text{O}_6\text{S}_3$   $[\text{M}+\text{H}]^+$ : 550.1822, found 550.1825.

**(S)-N-((S)-1-cyano-2-((S)-2-oxopyrrolidin-3-yl)ethyl)-7-((S)-3,3-dimethyl-2-(methylsulfonamido)butanoyl)-1,4-dithia-7-azaspiro[4.4]nonane-8-carboxamide**

**(11).** Compound **11** was prepared according to the procedure of compound **2**, white solid, yield: 72%.  $^1\text{H}$  NMR (400 MHz, DMSO- $d_6$ )  $\delta$  9.07 (d,  $J = 8.7$  Hz, 1H), 7.65 (s, 1H), 7.29 (d,  $J = 10.1$  Hz, 1H), 4.97 (ddd,  $J = 11.1, 8.6, 4.8$  Hz, 1H), 4.35 (dd,  $J = 10.1, 7.0$  Hz, 1H), 4.19 (d,  $J = 11.0$  Hz, 1H), 3.90-3.81 (m, 2H), 3.50-3.33 (m, 4H), 3.18-2.99 (m, 2H), 2.83 (s, 3H), 2.68-2.56 (m, 1H), 2.52 (d,  $J = 2.0$  Hz, 1H), 2.36-2.25 (m, 1H), 2.13 (dddd,  $J = 27.5, 17.0, 10.1, 3.1$  Hz, 2H), 1.70 (dddd,  $J = 11.7, 9.1, 7.1, 3.5$  Hz, 2H), 0.94 (s, 9H).  $^{13}\text{C}$  NMR (101 MHz, DMSO- $d_6$ )  $\delta$  178.04, 170.57, 169.94, 120.01, 67.62, 62.31, 61.28, 60.44, 55.38, 44.75, 41.17, 39.04, 38.18, 37.13, 35.75, 34.80, 27.34, 26.57. ESI-HRMS Calcd for  $\text{C}_{21}\text{H}_{34}\text{N}_5\text{O}_5\text{S}_3$   $[\text{M}+\text{H}]^+$ : 532.1717, found 532.1728. HPLC purity 96.9% (Rt = 6.152 min, Method B).

**(S)-N-((S)-1-amino-1-oxo-3-((S)-2-oxopyrrolidin-3-yl)propan-2-yl)-7-((S)-2-(cyclopropanesulfonamido)-3,3-dimethylbutanoyl)-1,4-dithia-7-azaspiro[4.4]nonane-8-carboxamide (S25).**

Compound **S25** was prepared according to the procedure of compound **S24**, white solid, yield: 40%.  $^1\text{H}$  NMR (400 MHz, DMSO- $d_6$ )  $\delta$  8.31 (d,  $J = 9.0$  Hz, 1H), 7.53 (s, 1H), 7.30 (s, 1H), 7.16 (d,  $J = 9.9$  Hz, 1H), 7.01 (s, 1H), 4.48 (dd,  $J = 9.9, 7.1$  Hz, 1H), 4.29 (ddd,  $J = 12.3, 9.0, 3.3$  Hz, 1H), 4.18 (d,  $J = 11.0$  Hz, 1H), 3.90-3.77 (m, 2H), 3.46-3.33 (m, 4H), 3.16-2.99 (m, 2H), 2.64-2.55 (m, 1H), 2.47 (d,  $J = 7.1$  Hz, 1H), 2.36-2.25 (m, 1H), 2.23-2.11 (m, 1H), 1.95 (td,  $J = 13.1, 3.5$  Hz, 1H), 1.63 (dq,  $J = 12.1, 9.2$  Hz, 1H), 1.52-1.41 (m, 1H), 1.36-1.20 (m, 3H), 0.96 (s, 9H), 0.90 (dd,  $J = 6.8, 5.1$  Hz, 1H), 0.82 (dt,  $J = 7.9, 3.2$  Hz, 1H).  $^{13}\text{C}$  NMR (101 MHz, DMSO- $d_6$ )  $\delta$  179.23, 173.82, 170.64, 169.77, 67.58, 62.82, 61.35, 60.73, 55.38, 50.73, 44.78, 39.21, 37.70, 36.05, 34.81, 30.81, 27.93, 26.66, 5.77, 5.51. ESI-HRMS Calcd for  $\text{C}_{23}\text{H}_{38}\text{N}_5\text{O}_6\text{S}_3$   $[\text{M}+\text{H}]^+$ : 576.1979, found 576.1981.

**(S)-N-((S)-1-cyano-2-((S)-2-oxopyrrolidin-3-yl)ethyl)-7-((S)-2-(cyclopropanesulfonamido)-3,3-dimethylbutanoyl)-1,4-dithia-7-azaspiro[4.4]nonane-8-carboxamide**

**(12).** Compound **12** was prepared according to the procedure of compound **2**, white solid, yield: 67%.  $^1\text{H}$  NMR (400 MHz, DMSO- $d_6$ )  $\delta$  9.06 (d,  $J = 8.7$  Hz, 1H), 7.65 (s, 1H), 7.17 (d,  $J = 9.9$  Hz, 1H), 4.97 (ddd,  $J = 11.1, 8.6, 4.9$  Hz, 1H), 4.33 (dd,  $J = 10.1, 7.0$  Hz, 1H), 4.19 (d,  $J = 11.1$  Hz, 1H), 3.91-3.81 (m, 2H), 3.46-3.35 (m, 4H), 3.18-3.00 (m, 2H), 2.61 (dd,  $J = 13.0, 7.1$  Hz, 1H), 2.48 (s, 1H), 2.30 (dd,  $J = 12.9, 10.0$  Hz, 1H),

2.21-2.05 (m, 2H), 1.75-1.64 (m, 2H), 1.36-1.20 (m, 3H), 0.95 (s, 9H), 0.95-0.74 (m, 2H).  $^{13}\text{C}$  NMR (101 MHz,  $\text{DMSO-}d_6$ )  $\delta$  178.07, 170.67, 170.00, 120.02, 67.59, 62.33, 61.32, 60.59, 55.38, 44.94, 39.23, 38.20, 37.14, 36.01, 34.83, 30.84, 27.36, 26.63, 5.72, 5.52. ESI-HRMS Calcd for  $\text{C}_{23}\text{H}_{36}\text{N}_5\text{O}_5\text{S}_3$   $[\text{M}+\text{H}]^+$ : 558.1873, found 558.1874. HPLC purity 95.2% ( $R_t = 7.664$  min, Method B).



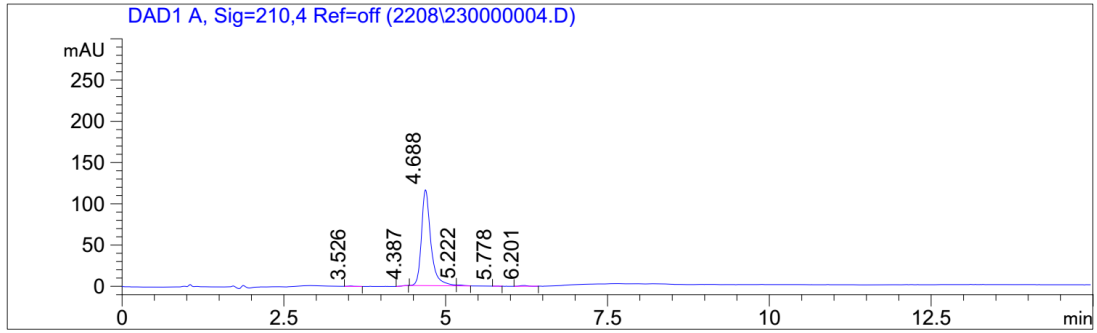

| Peak # | RT [min] | Width [min] | Area [mAU*s] | Height [mAU] | Area %  |
|--------|----------|-------------|--------------|--------------|---------|
| 1      | 3.526    | 0.0743      | 2.17273      | 0.42005      | 0.1840  |
| 2      | 4.387    | 0.0540      | 0.89901      | 0.29116      | 0.0761  |
| 3      | 4.688    | 0.1468      | 1163.26721   | 116.23634    | 98.4991 |
| 4      | 5.222    | 0.1090      | 8.26054      | 1.08246      | 0.6995  |
| 5      | 5.778    | 0.0264      | 0.08750      | 0.08251      | 0.0074  |
| 6      | 6.201    | 0.1160      | 6.30603      | 0.89754      | 0.5340  |

### HPLC of 1

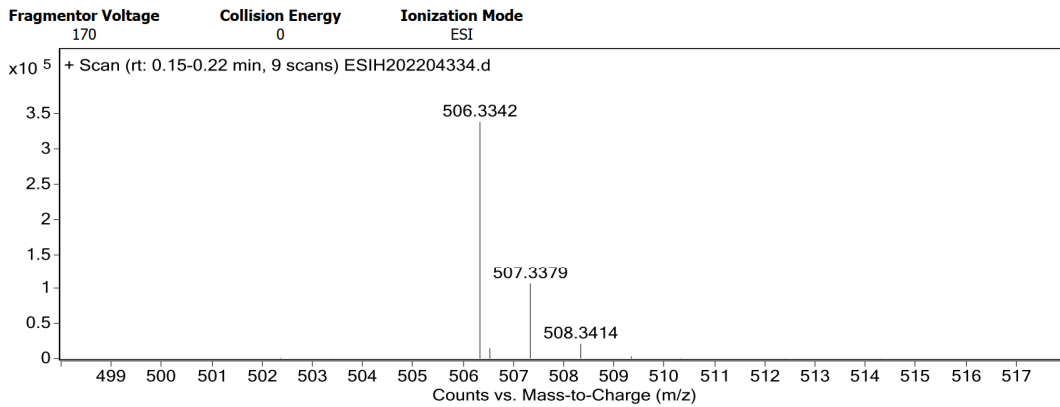

#### Formula Calculator Results

| m/z      | Calc m/z | Diff (mDa) | Diff (ppm) | Ion Formula   | Ion    |
|----------|----------|------------|------------|---------------|--------|
| 506.3342 | 506.3337 | -0.53      | -1.05      | C26 H44 N5 O5 | (M+H)+ |

--- End Of Report ---

### HRMS of 1



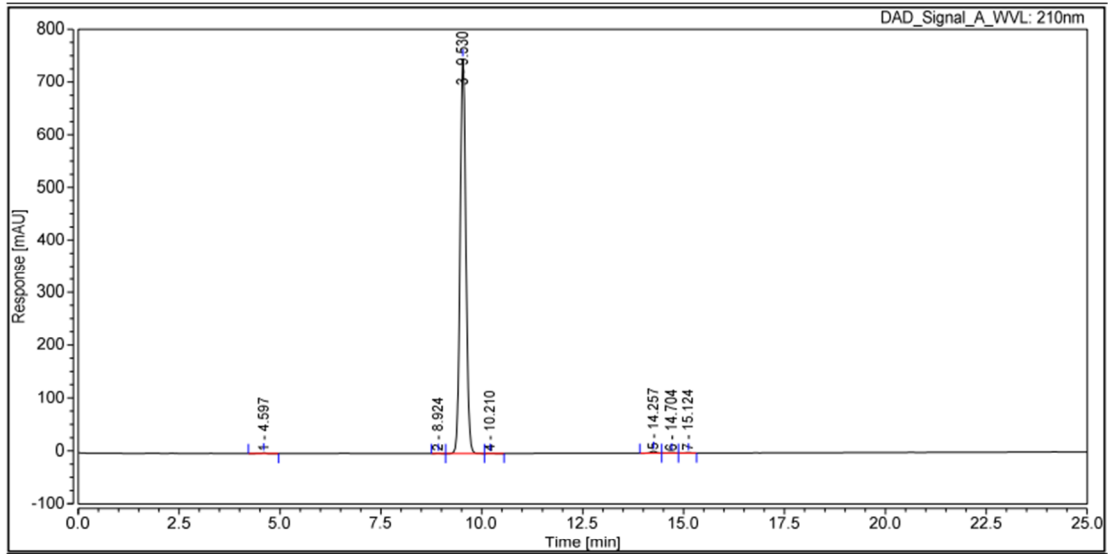

| Integration Results |           |                    |                 |                |                 |                  |                 |
|---------------------|-----------|--------------------|-----------------|----------------|-----------------|------------------|-----------------|
| No.                 | Peak Name | Retention Time min | Area mAU*s      | Height mAU     | Relative Area % | S/N              | Resolution (EP) |
| 1                   |           | 4.597              | 13.28421        | 1.361          | 0.1767          | 182.5            | 20.49           |
| 2                   |           | 8.924              | 4.52881         | 0.531          | 0.0602          | 71.3             | 2.49            |
| 3                   |           | 9.530              | 7449.77408      | 749.049        | 99.0860         | 100479.9         | 2.67            |
| 4                   |           | 10.210             | 3.99713         | 0.399          | 0.0532          | 53.6             | 16.81           |
| 5                   |           | 14.257             | 32.28688        | 3.614          | 0.4294          | 484.7            | 1.85            |
| 6                   |           | 14.704             | 7.97347         | 0.764          | 0.1061          | 102.5            | 1.67            |
| 7                   |           | 15.124             | 6.65165         | 0.674          | 0.0885          | 90.4             | n.a.            |
| <b>Total:</b>       |           |                    | <b>7518.496</b> | <b>756.391</b> | <b>100.0000</b> | <b>101464.89</b> |                 |

## HPLC of 2

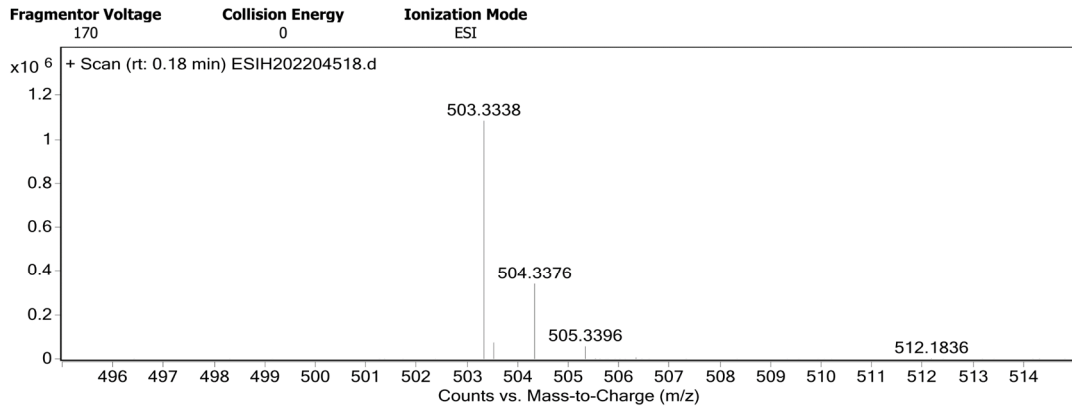

### Formula Calculator Results

| m/z      | Calc m/z | Diff (mDa) | Diff (ppm) | Ion Formula                                                   | Ion                |
|----------|----------|------------|------------|---------------------------------------------------------------|--------------------|
| 503.3338 | 503.334  | 0.25       | 0.5        | C <sub>26</sub> H <sub>43</sub> N <sub>6</sub> O <sub>4</sub> | (M+H) <sup>+</sup> |

--- End Of Report ---

## HRMS of 2





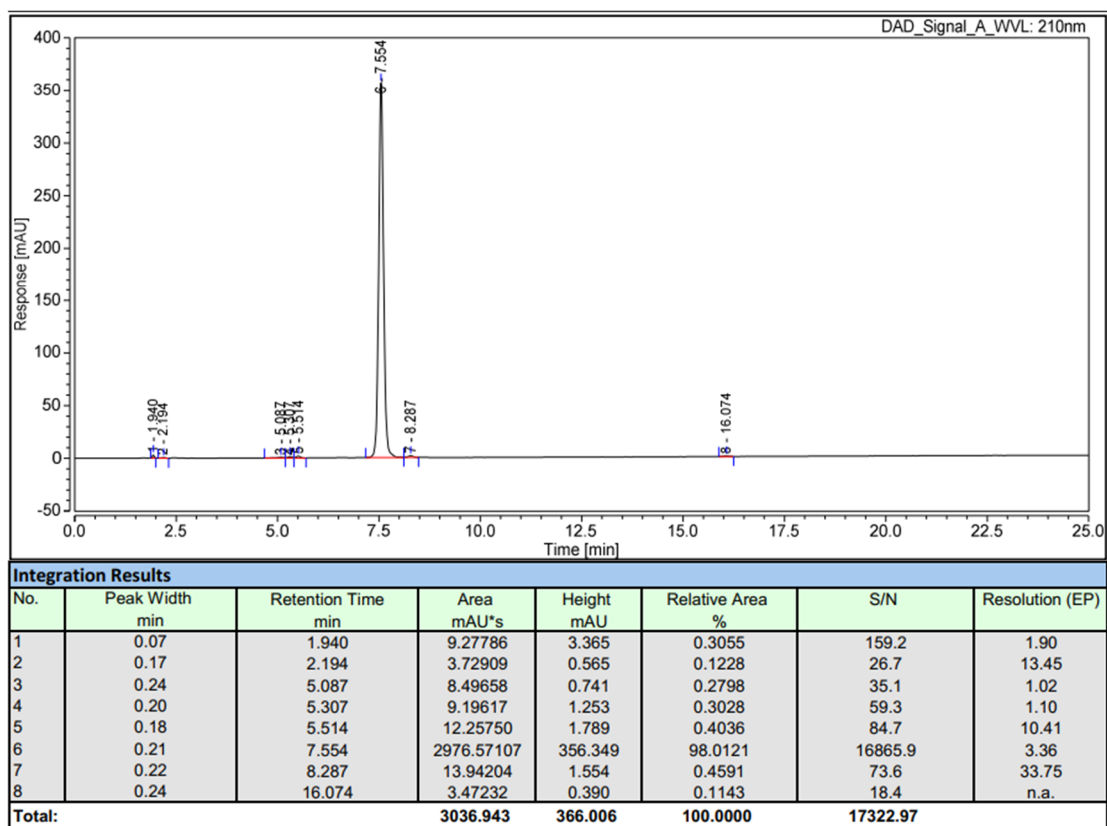

### HPLC of 3

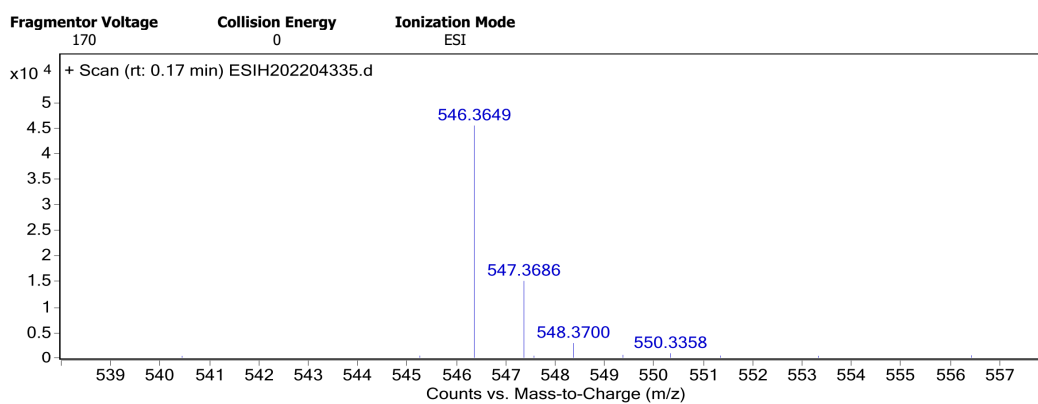

#### Formula Calculator Results

| m/z      | Calc m/z | Diff (mDa) | Diff (ppm) | Ion Formula                                                   | Ion                |
|----------|----------|------------|------------|---------------------------------------------------------------|--------------------|
| 546.3649 | 546.365  | 0.07       | 0.12       | C <sub>29</sub> H <sub>48</sub> N <sub>5</sub> O <sub>5</sub> | (M+H) <sup>+</sup> |

--- End Of Report ---

### HRMS of 3

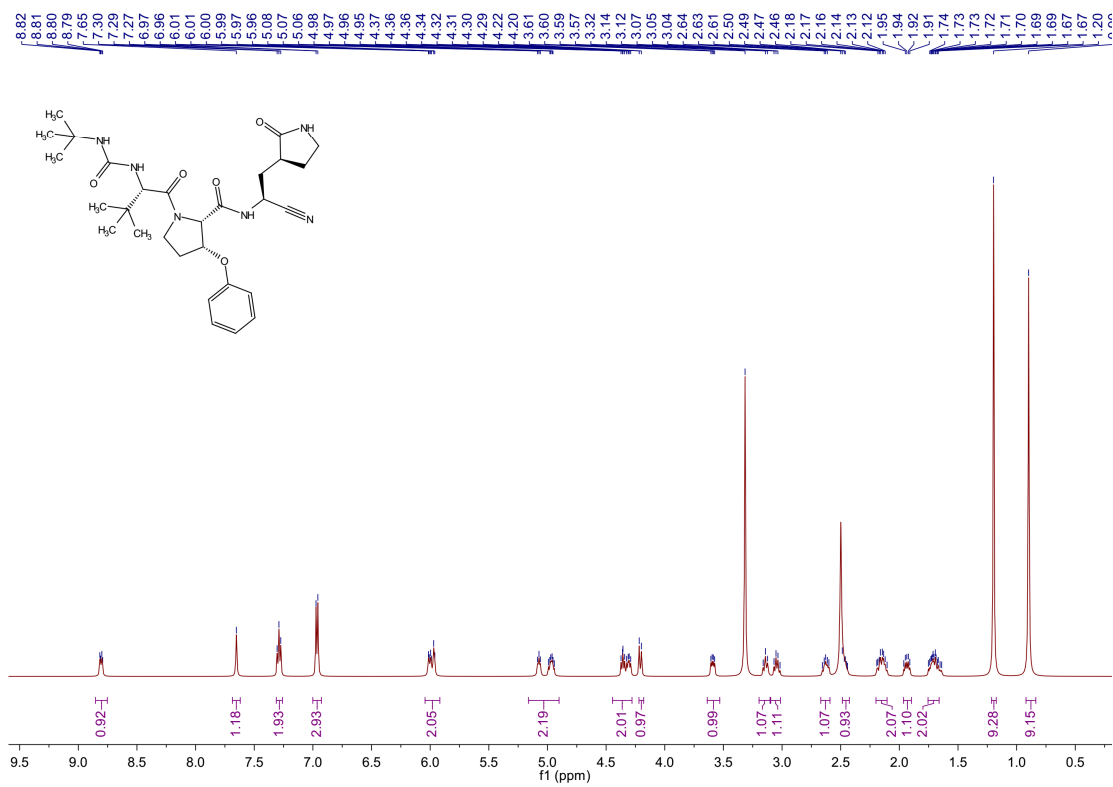

<sup>1</sup>H NMR of 4

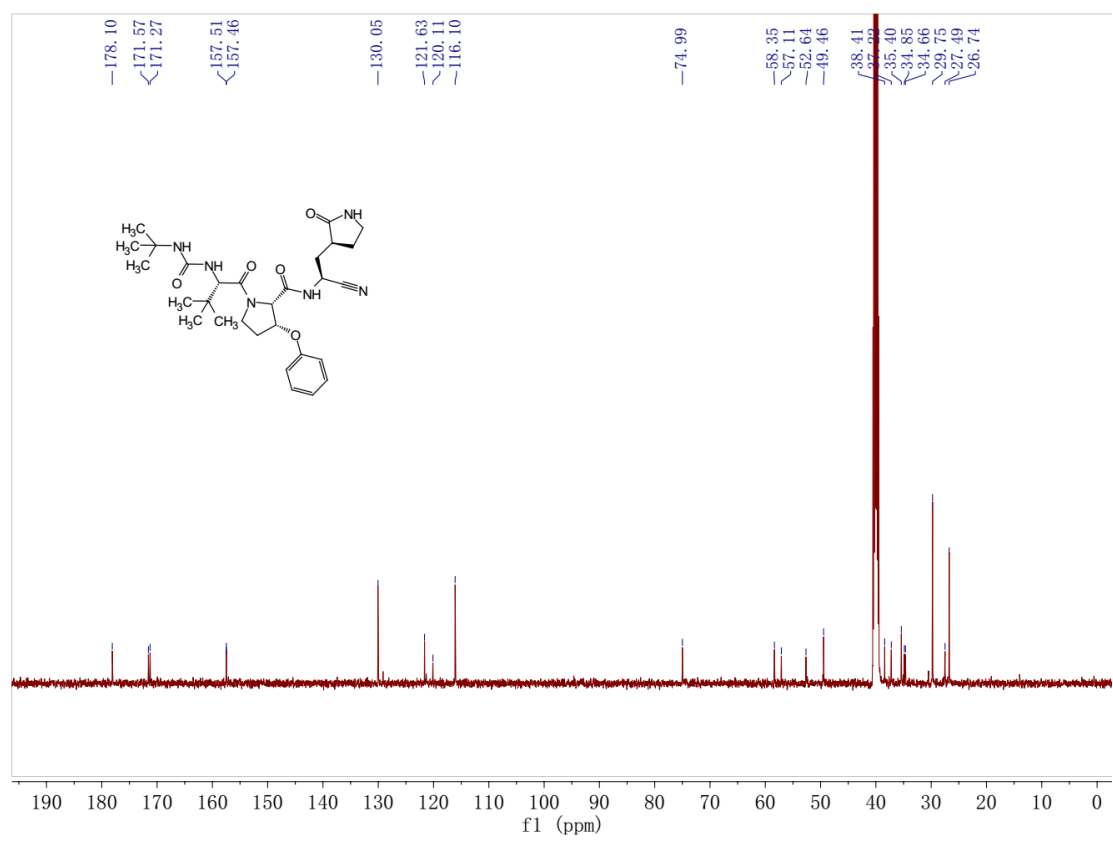

<sup>13</sup>C NMR of 4

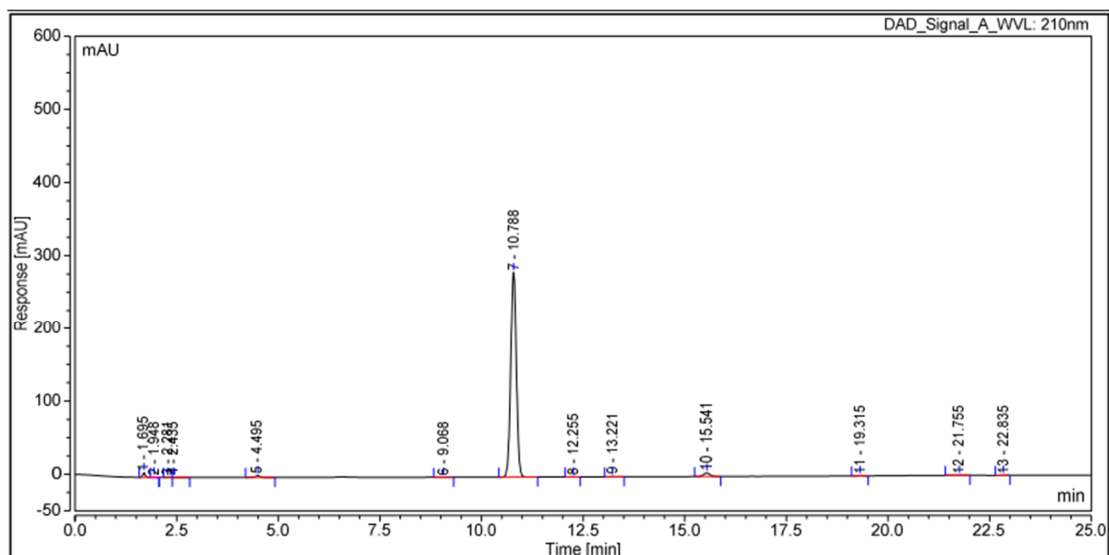

| Integration Results |           |                       |                 |                |                    |                |                 |
|---------------------|-----------|-----------------------|-----------------|----------------|--------------------|----------------|-----------------|
| No.                 | Peak Name | Retention Time<br>min | Area<br>mAU*s   | Height<br>mAU  | Relative Area<br>% | S/N            | Resolution (EP) |
| 1                   |           | 1.695                 | 29.86031        | 6.716          | 1.0609             | 157.6          | n.a.            |
| 2                   |           | 1.948                 | 3.62415         | 0.598          | 0.1288             | 14.0           | n.a.            |
| 3                   |           | 2.281                 | 2.16971         | 0.244          | 0.0771             | 5.7            | n.a.            |
| 4                   |           | 2.435                 | 1.18265         | 0.141          | 0.0420             | 3.3            | n.a.            |
| 5                   |           | 4.495                 | 21.40865        | 2.532          | 0.7606             | 59.4           | 20.37           |
| 6                   |           | 9.068                 | 2.13633         | 0.213          | 0.0759             | 5.0            | 6.65            |
| 7                   |           | 10.788                | 2684.14860      | 281.044        | 95.3676            | 6593.6         | 6.13            |
| 8                   |           | 12.255                | 2.07891         | 0.241          | 0.0739             | 5.6            | 3.93            |
| 9                   |           | 13.221                | 3.94154         | 0.390          | 0.1400             | 9.1            | 8.38            |
| 10                  |           | 15.541                | 54.27084        | 4.920          | 1.9282             | 115.4          | 13.94           |
| 11                  |           | 19.315                | 5.75180         | 0.609          | 0.2044             | 14.3           | 8.96            |
| 12                  |           | 21.755                | 1.71986         | 0.136          | 0.0611             | 3.2            | 4.11            |
| 13                  |           | 22.835                | 2.23618         | 0.254          | 0.0795             | 6.0            | n.a.            |
| <b>Total:</b>       |           |                       | <b>2814.530</b> | <b>298.038</b> | <b>100.0000</b>    | <b>6992.26</b> |                 |

### HPLC of 4

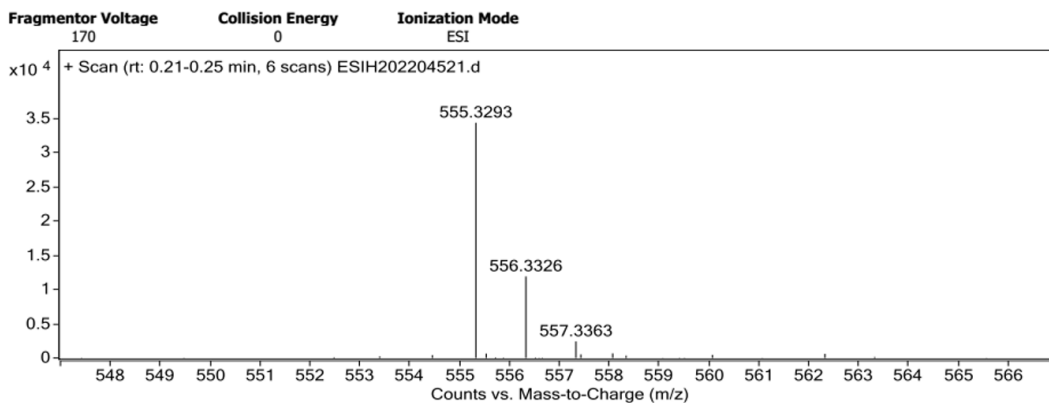

#### Formula Calculator Results

| m/z      | Calc m/z | Diff (mDa) | Diff (ppm) | Ion Formula                                                   | Ion                |
|----------|----------|------------|------------|---------------------------------------------------------------|--------------------|
| 555.3293 | 555.3289 | -0.4       | -0.72      | C <sub>29</sub> H <sub>43</sub> N <sub>6</sub> O <sub>5</sub> | (M+H) <sup>+</sup> |

--- End Of Report ---

### HRMS of 4



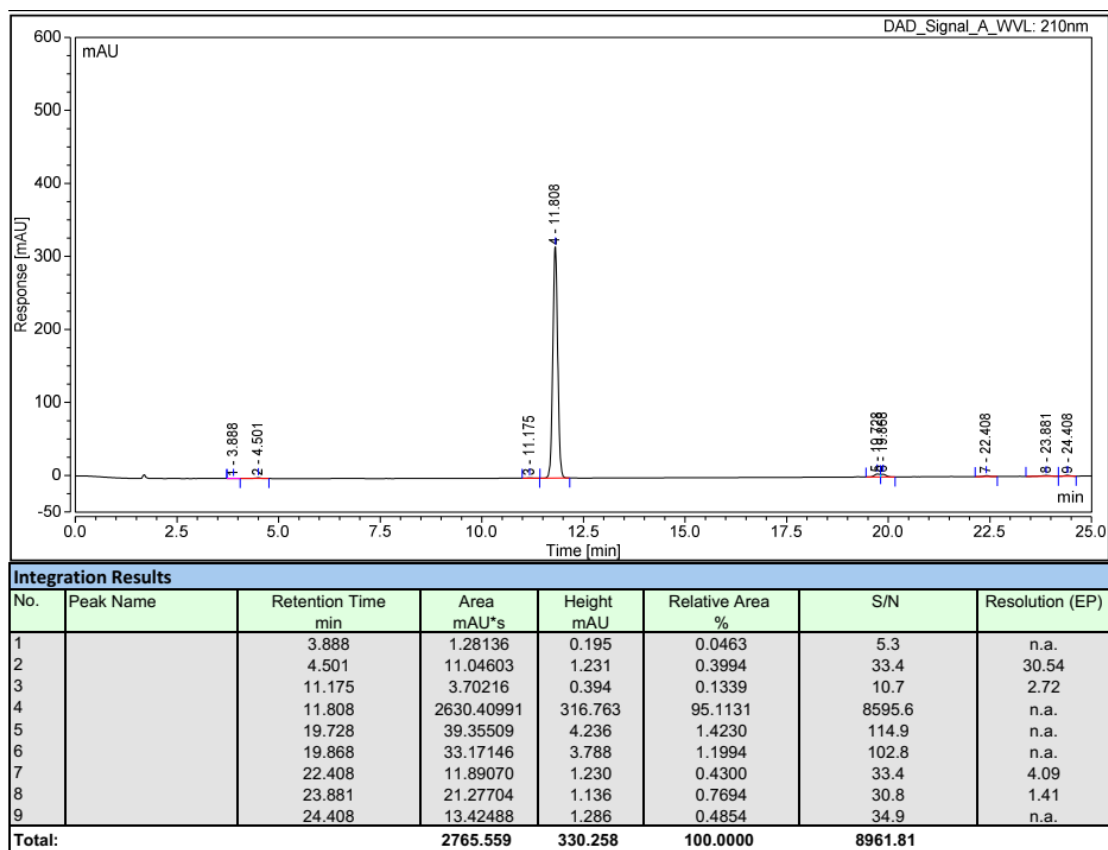

### HPLC of 5

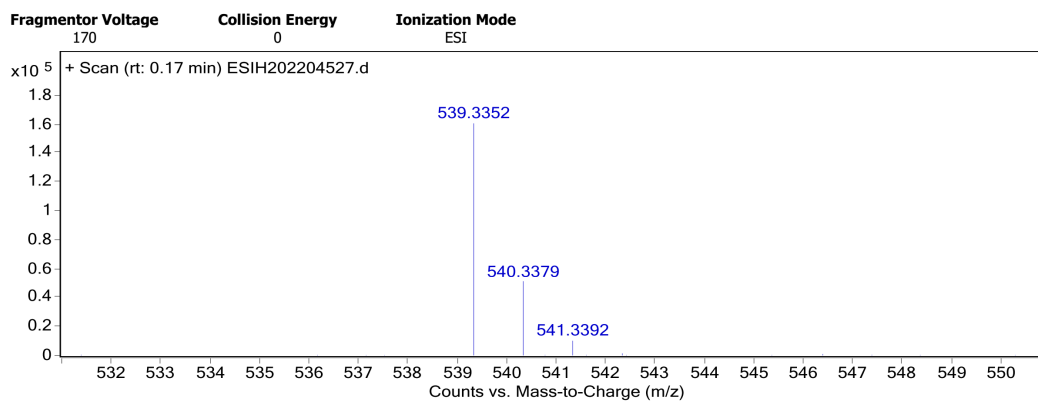

#### Formula Calculator Results

| m/z      | Calc m/z | Diff (mDa) | Diff (ppm) | Ion Formula                                                   | Ion                |
|----------|----------|------------|------------|---------------------------------------------------------------|--------------------|
| 539.3352 | 539.334  | -1.19      | -2.21      | C <sub>29</sub> H <sub>43</sub> N <sub>6</sub> O <sub>4</sub> | (M+H) <sup>+</sup> |

--- End Of Report ---

### HRMS of 5



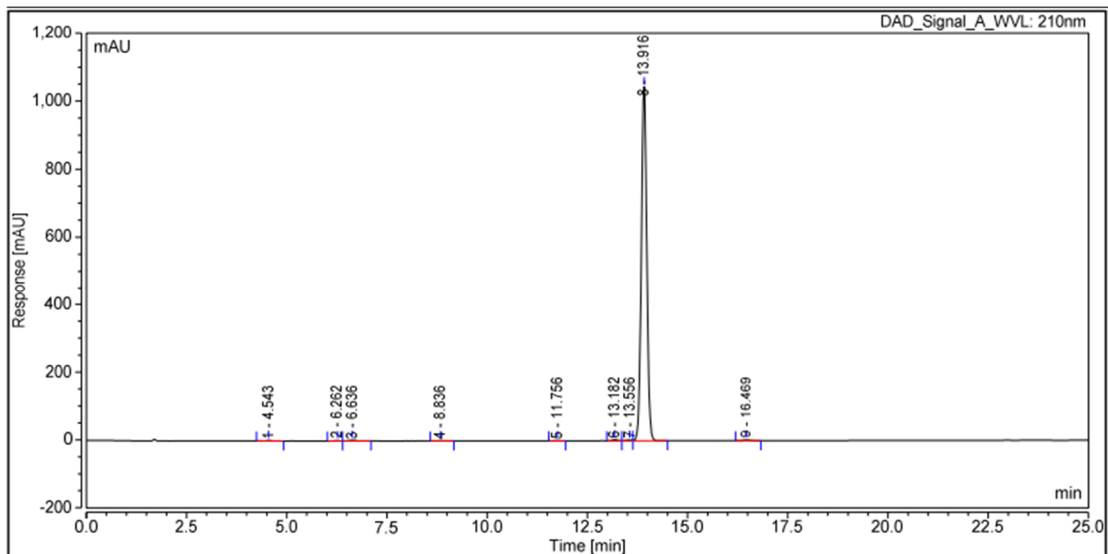

| Integration Results |           |                       |                  |                 |                    |                 |                 |
|---------------------|-----------|-----------------------|------------------|-----------------|--------------------|-----------------|-----------------|
| No.                 | Peak Name | Retention Time<br>min | Area<br>mAU*s    | Height<br>mAU   | Relative Area<br>% | S/N             | Resolution (EP) |
| 1                   |           | 4.543                 | 15.99655         | 1.836           | 0.1594             | 25.9            | 7.04            |
| 2                   |           | 6.262                 | 12.28754         | 1.110           | 0.1225             | 15.7            | 1.17            |
| 3                   |           | 6.636                 | 31.45998         | 2.271           | 0.3136             | 32.0            | 7.38            |
| 4                   |           | 8.836                 | 10.75783         | 1.091           | 0.1072             | 15.4            | 11.69           |
| 5                   |           | 11.756                | 4.64191          | 0.502           | 0.0463             | 7.1             | 5.64            |
| 6                   |           | 13.182                | 31.89006         | 3.180           | 0.3179             | 44.8            | n.a.            |
| 7                   |           | 13.556                | 20.55996         | 1.869           | 0.2049             | 26.3            | n.a.            |
| 8                   |           | 13.916                | 9879.11622       | 1045.165        | 98.4696            | 14736.4         | 9.97            |
| 9                   |           | 16.469                | 25.94643         | 2.524           | 0.2586             | 35.6            | n.a.            |
| <b>Total:</b>       |           |                       | <b>10032.656</b> | <b>1059.547</b> | <b>100.0000</b>    | <b>14939.15</b> |                 |

HPLC of 6

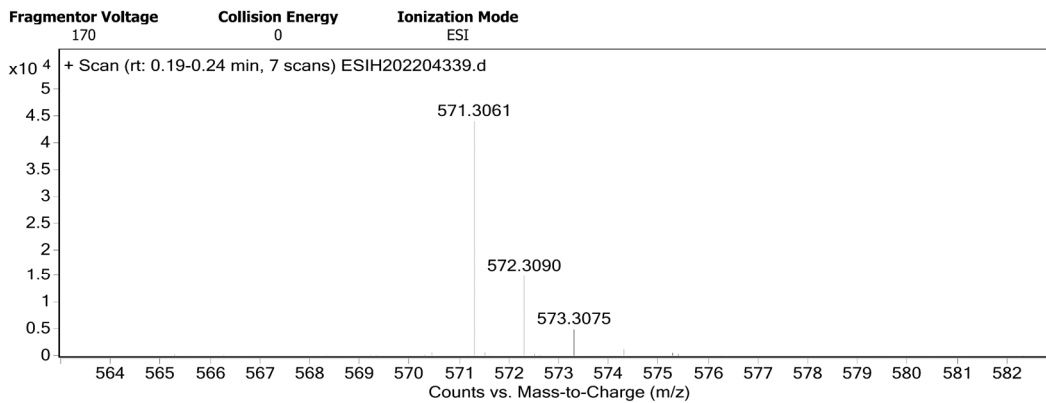

| Formula Calculator Results |          |            |            |                 |        |
|----------------------------|----------|------------|------------|-----------------|--------|
| m/z                        | Calc m/z | Diff (mDa) | Diff (ppm) | Ion Formula     | Ion    |
| 571.3061                   | 571.3061 | -0.04      | -0.07      | C29 H43 N6 O4 S | (M+H)+ |

--- End Of Report ---

HRMS of 6

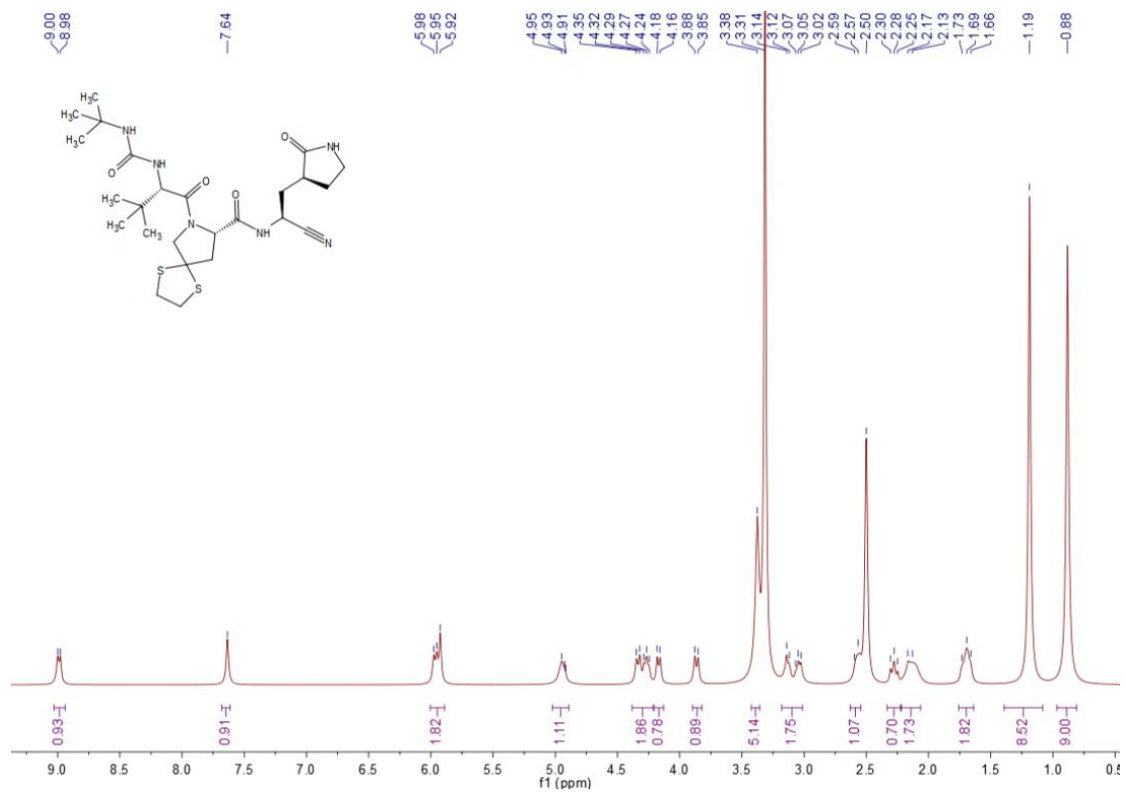

<sup>1</sup>H NMR of 7

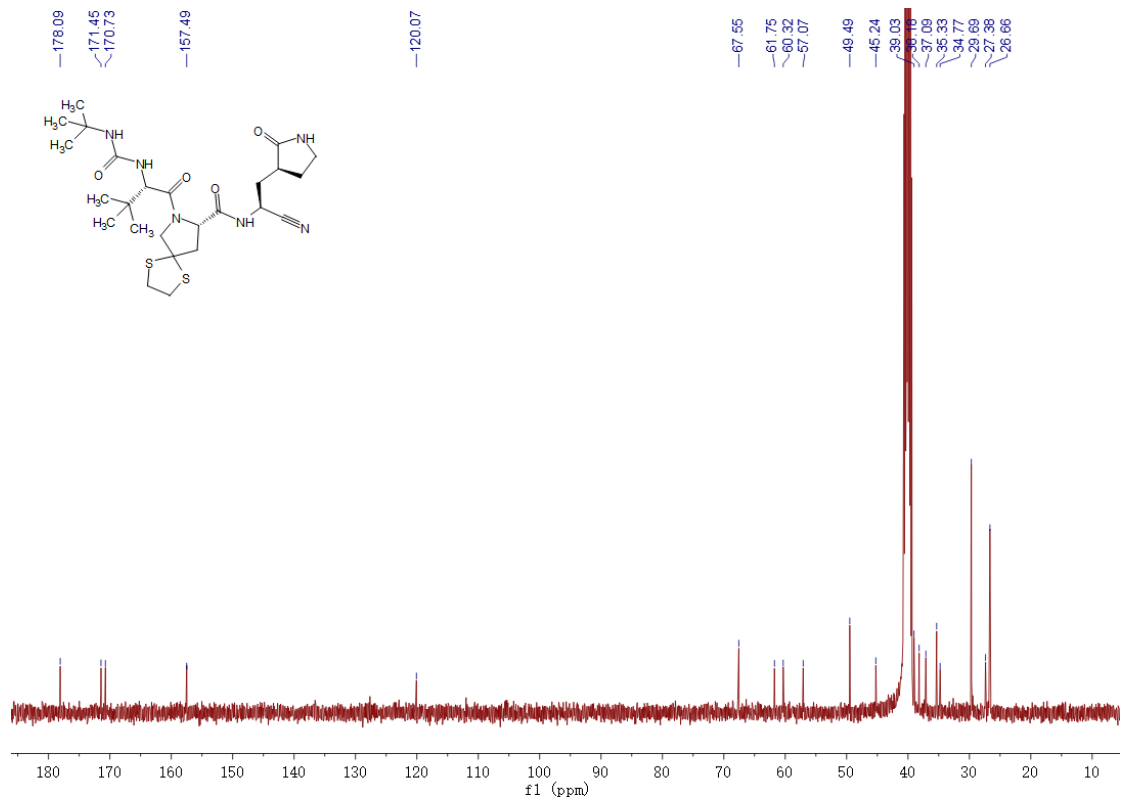

<sup>13</sup>C NMR of 7



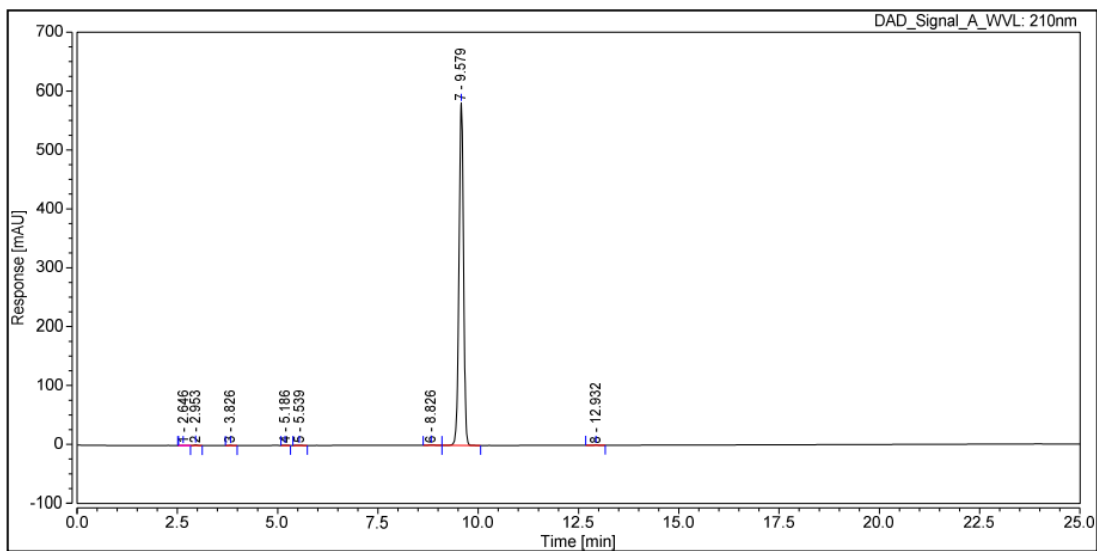

| Integration Results |           |                       |                 |                |                    |                 |                 |
|---------------------|-----------|-----------------------|-----------------|----------------|--------------------|-----------------|-----------------|
| No.                 | Peak Name | Retention Time<br>min | Area<br>mAU*s   | Height<br>mAU  | Relative Area<br>% | S/N             | Resolution (EP) |
| 1                   |           | 2.646                 | 0.96703         | 0.117          | 0.0212             | 19.3            | n.a.            |
| 2                   |           | 2.953                 | 5.32646         | 0.945          | 0.1167             | 156.6           | 5.57            |
| 3                   |           | 3.826                 | 1.85947         | 0.303          | 0.0407             | 50.2            | 8.38            |
| 4                   |           | 5.186                 | 1.20268         | 0.208          | 0.0263             | 34.4            | 2.05            |
| 5                   |           | 5.539                 | 1.27287         | 0.178          | 0.0279             | 29.5            | 14.84           |
| 6                   |           | 8.826                 | 6.88438         | 0.697          | 0.1508             | 115.5           | 3.28            |
| 7                   |           | 9.579                 | 4545.64571      | 581.218        | 99.5617            | 96317.2         | 15.89           |
| 8                   |           | 12.932                | 2.49844         | 0.289          | 0.0547             | 48.0            | n.a.            |
| <b>Total:</b>       |           |                       | <b>4565.657</b> | <b>583.955</b> | <b>100.0000</b>    | <b>96770.73</b> |                 |

HPLC of 7

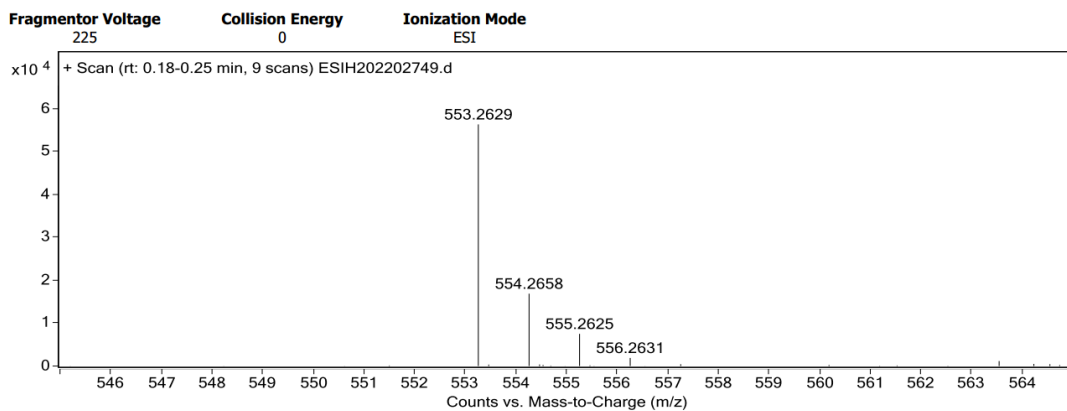

| Formula Calculator Results |          |            |            |                  |        |
|----------------------------|----------|------------|------------|------------------|--------|
| m/z                        | Calc m/z | Diff (mDa) | Diff (ppm) | Ion Formula      | Ion    |
| 553.2629                   | 553.2625 | -0.41      | -0.74      | C25 H41 N6 O4 S2 | (M+H)+ |

--- End Of Report ---

HRMS of 7

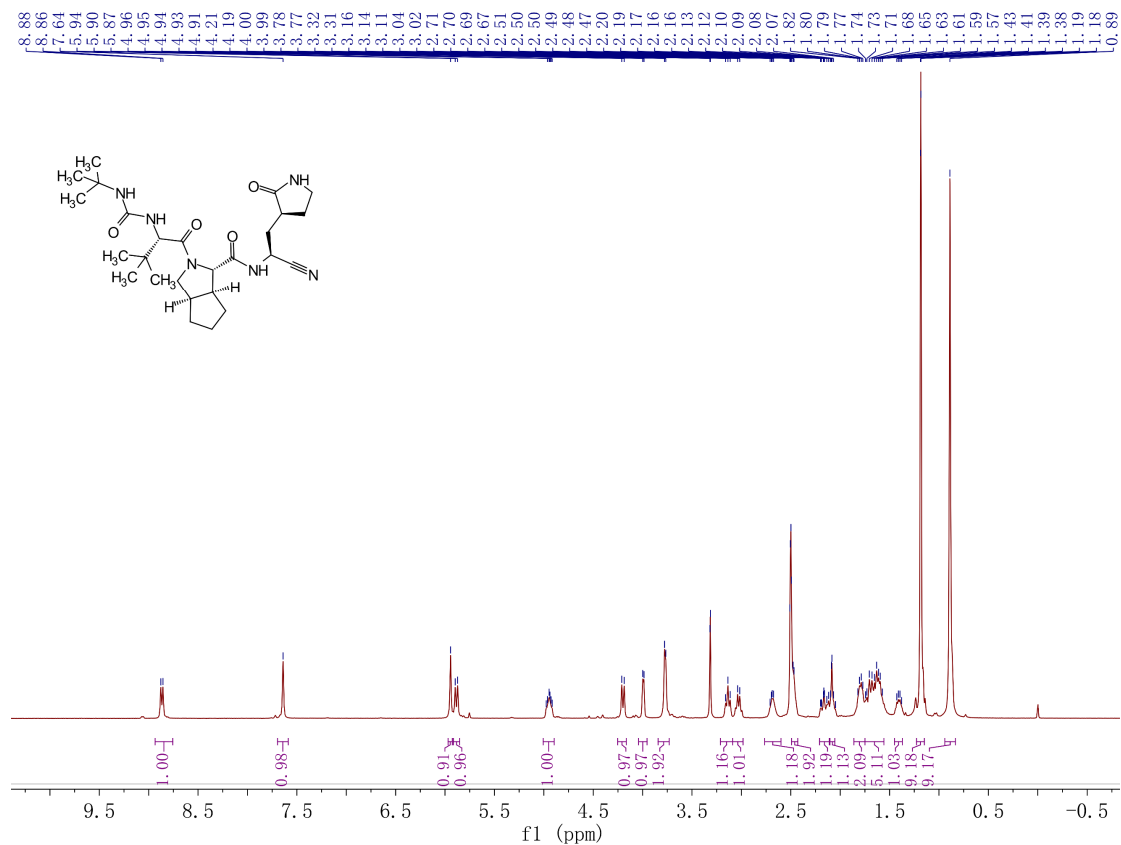

<sup>1</sup>H NMR of **8**

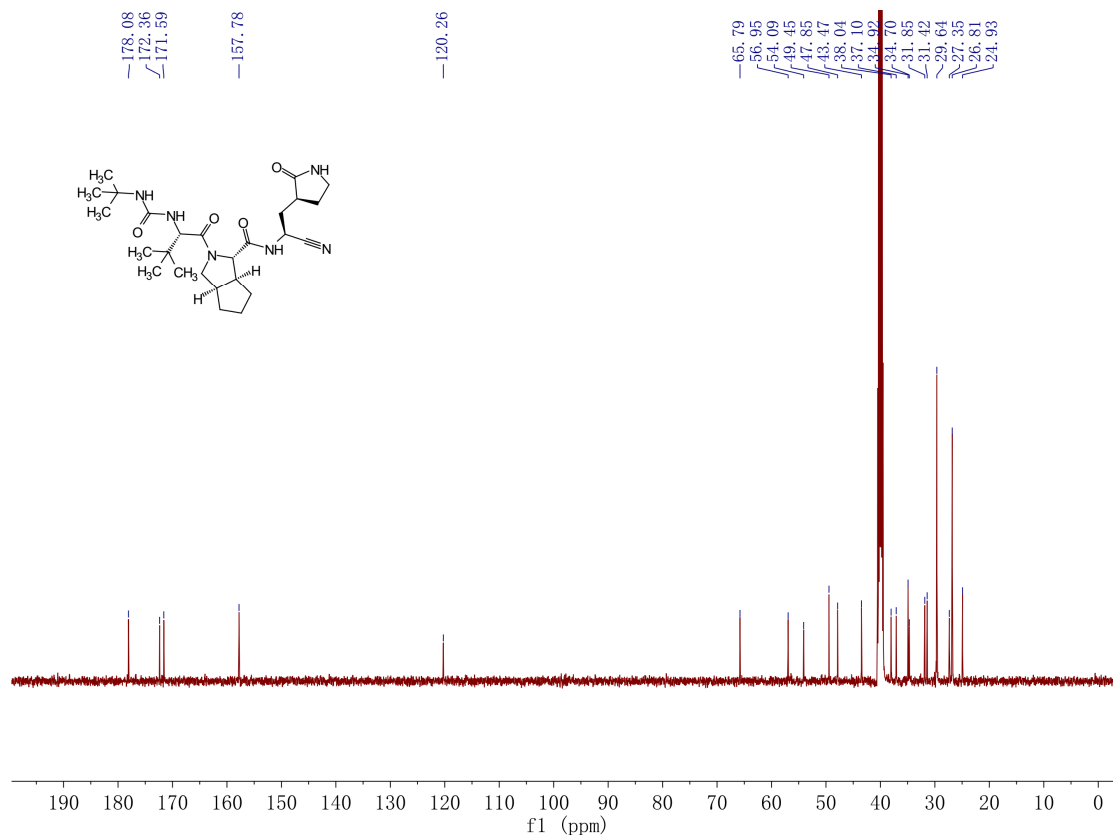

<sup>13</sup>C NMR of **8**

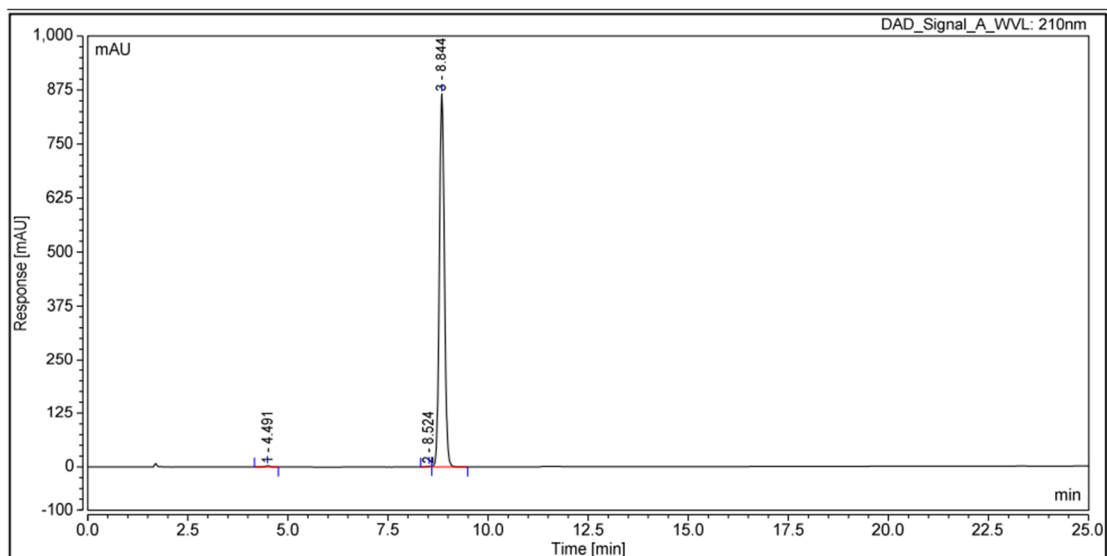

| Integration Results |           |                    |                 |                |                 |                  |                 |
|---------------------|-----------|--------------------|-----------------|----------------|-----------------|------------------|-----------------|
| No.                 | Peak Name | Retention Time min | Area mAU*s      | Height mAU     | Relative Area % | S/N              | Resolution (EP) |
| 1                   |           | 4.491              | 26.93901        | 3.146          | 0.3522          | 686.9            | n.a.            |
| 2                   |           | 8.524              | 14.19549        | 1.690          | 0.1856          | 368.9            | n.a.            |
| 3                   |           | 8.844              | 7607.35717      | 866.603        | 99.4622         | 189201.7         | n.a.            |
| <b>Total:</b>       |           |                    | <b>7648.492</b> | <b>871.439</b> | <b>100.0000</b> | <b>190257.54</b> |                 |

### HPLC of 8

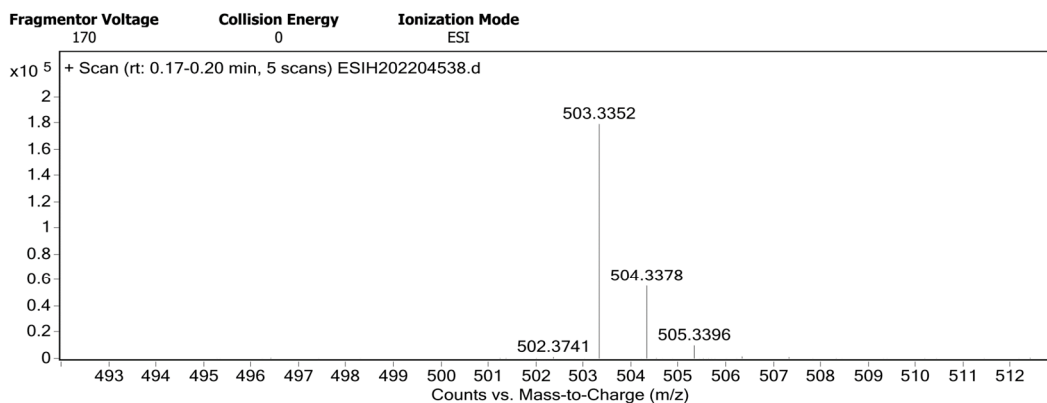

| Formula Calculator Results |          |            |            |                                                               |                    |
|----------------------------|----------|------------|------------|---------------------------------------------------------------|--------------------|
| m/z                        | Calc m/z | Diff (mDa) | Diff (ppm) | Ion Formula                                                   | Ion                |
| 503.3352                   | 503.334  | -1.18      | -2.34      | C <sub>26</sub> H <sub>43</sub> N <sub>6</sub> O <sub>4</sub> | (M+H) <sup>+</sup> |

--- End Of Report ---

### HRMS of 8

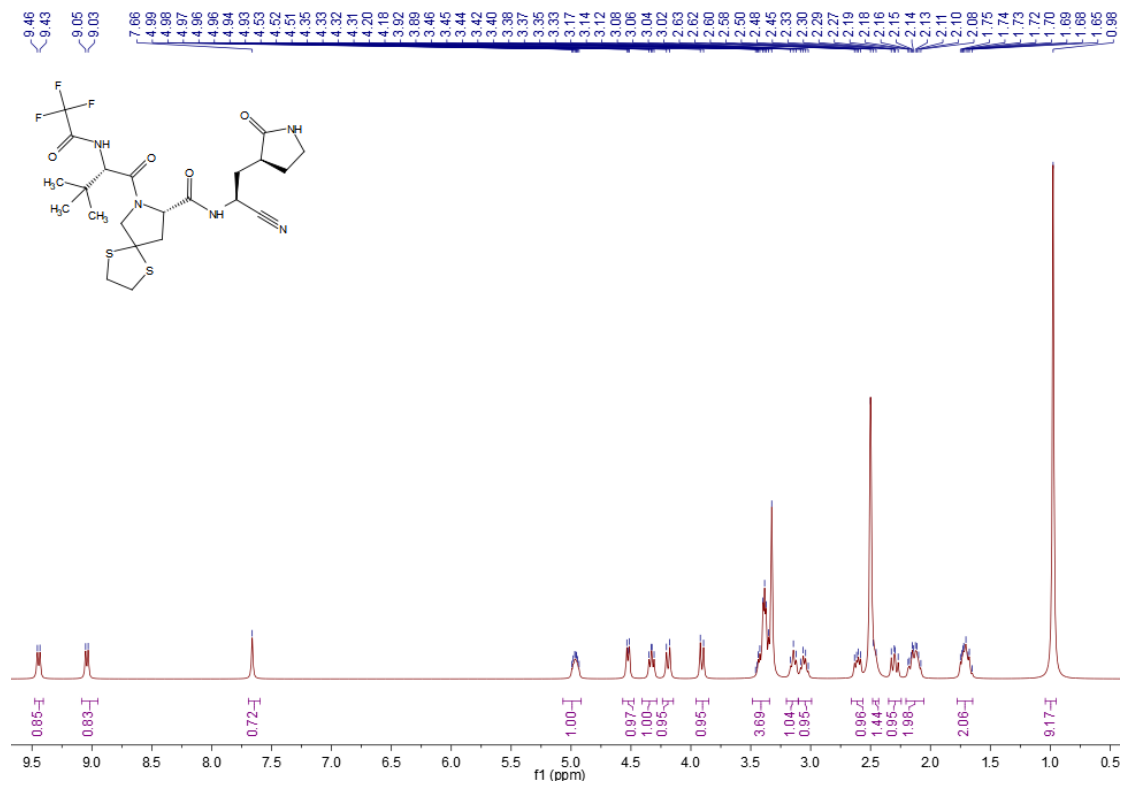

**<sup>1</sup>H NMR of 9**

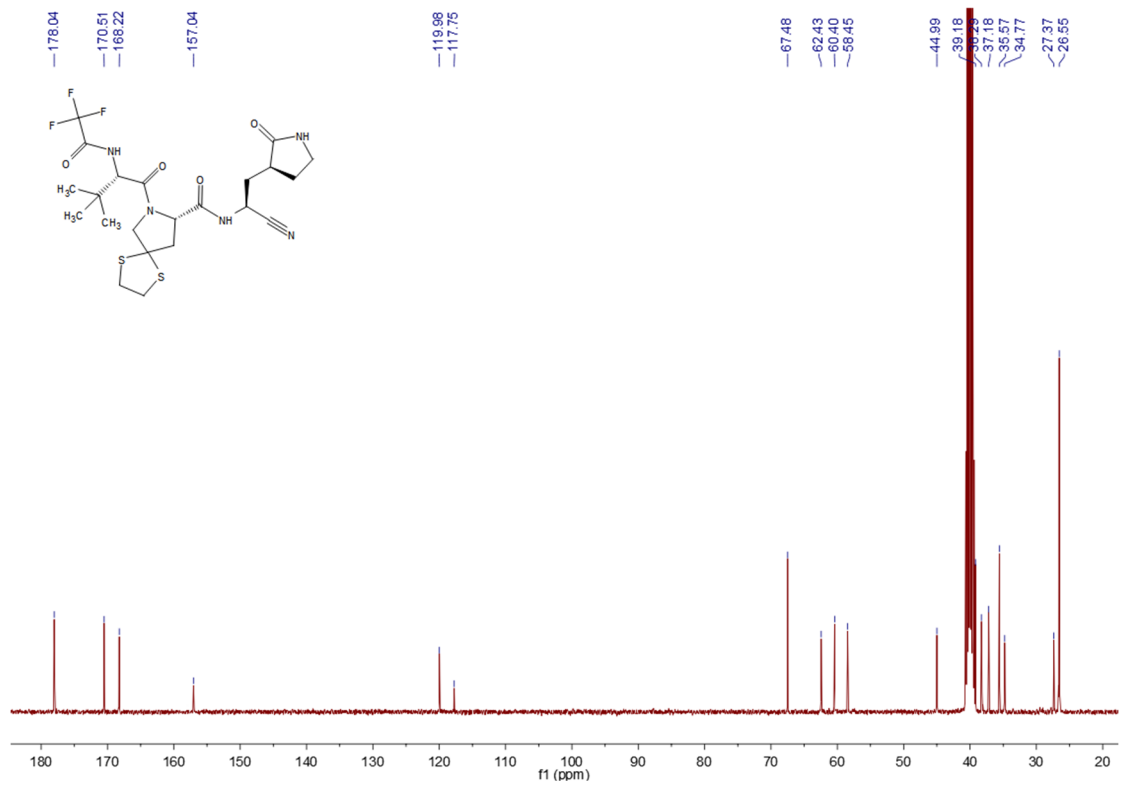

**<sup>13</sup>C NMR of 9**

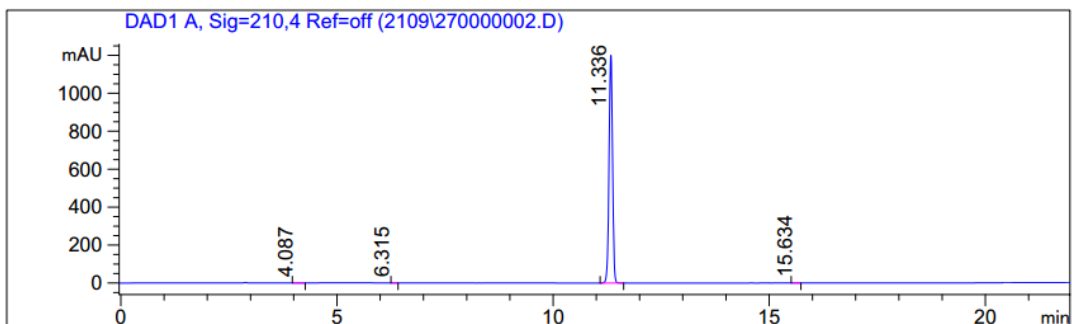

| Peak # | RT [min] | Width [min] | Area [mAU*s] | Height [mAU] | Area %  |
|--------|----------|-------------|--------------|--------------|---------|
| 1      | 4.087    | 0.1032      | 2.14293      | 0.30799      | 0.0316  |
| 2      | 6.315    | 0.0725      | 0.58775      | 0.11328      | 0.0087  |
| 3      | 11.336   | 0.0877      | 6771.52148   | 1203.29675   | 99.9009 |
| 4      | 15.634   | 0.0970      | 3.98947      | 0.63747      | 0.0589  |

### HPLC of 9

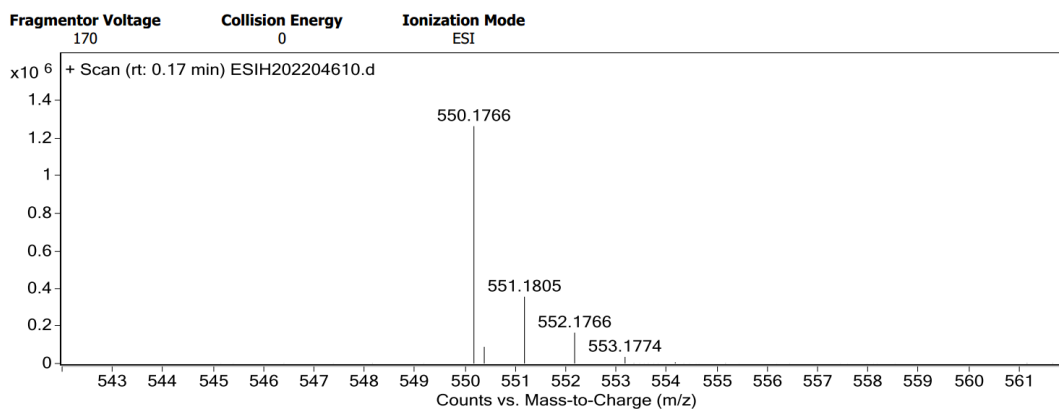

#### Formula Calculator Results

| m/z      | Calc m/z | Diff (mDa) | Diff (ppm) | Ion Formula         | Ion    |
|----------|----------|------------|------------|---------------------|--------|
| 550.1766 | 550.1764 | -0.24      | -0.43      | C22 H31 F3 N5 O4 S2 | (M+H)+ |

--- End Of Report ---

### HRMS of 9

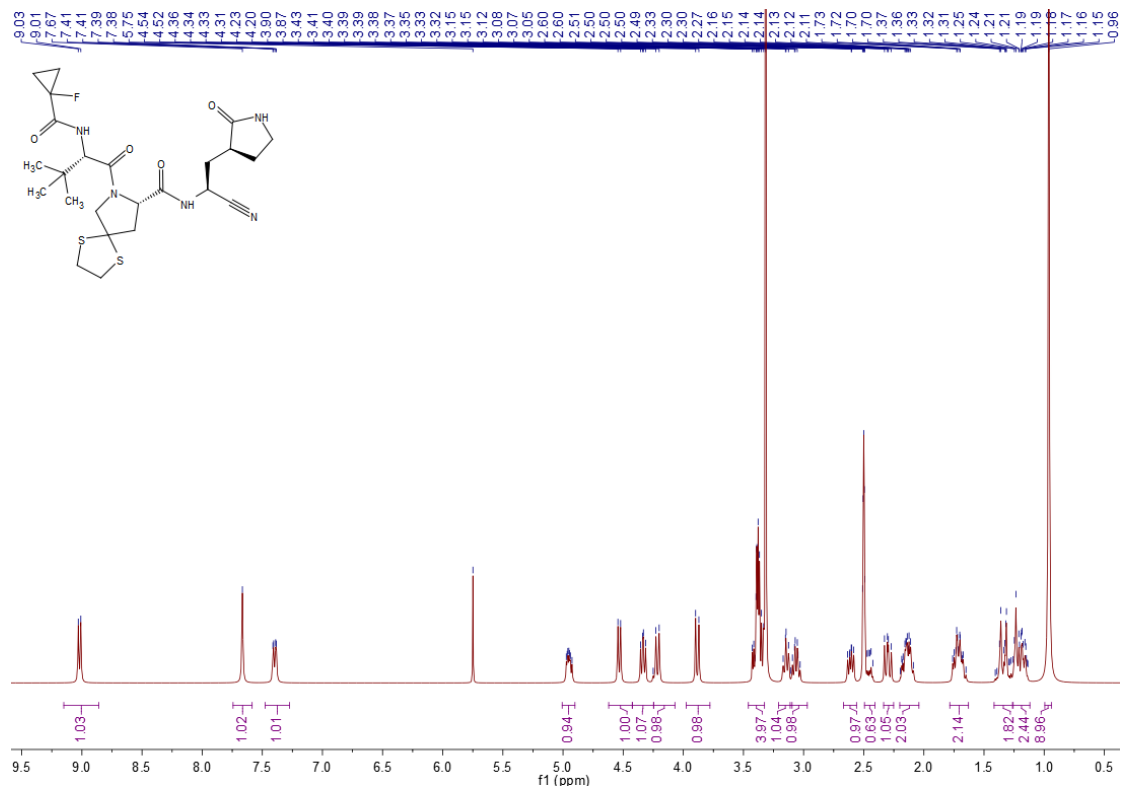

<sup>1</sup>H NMR of 10

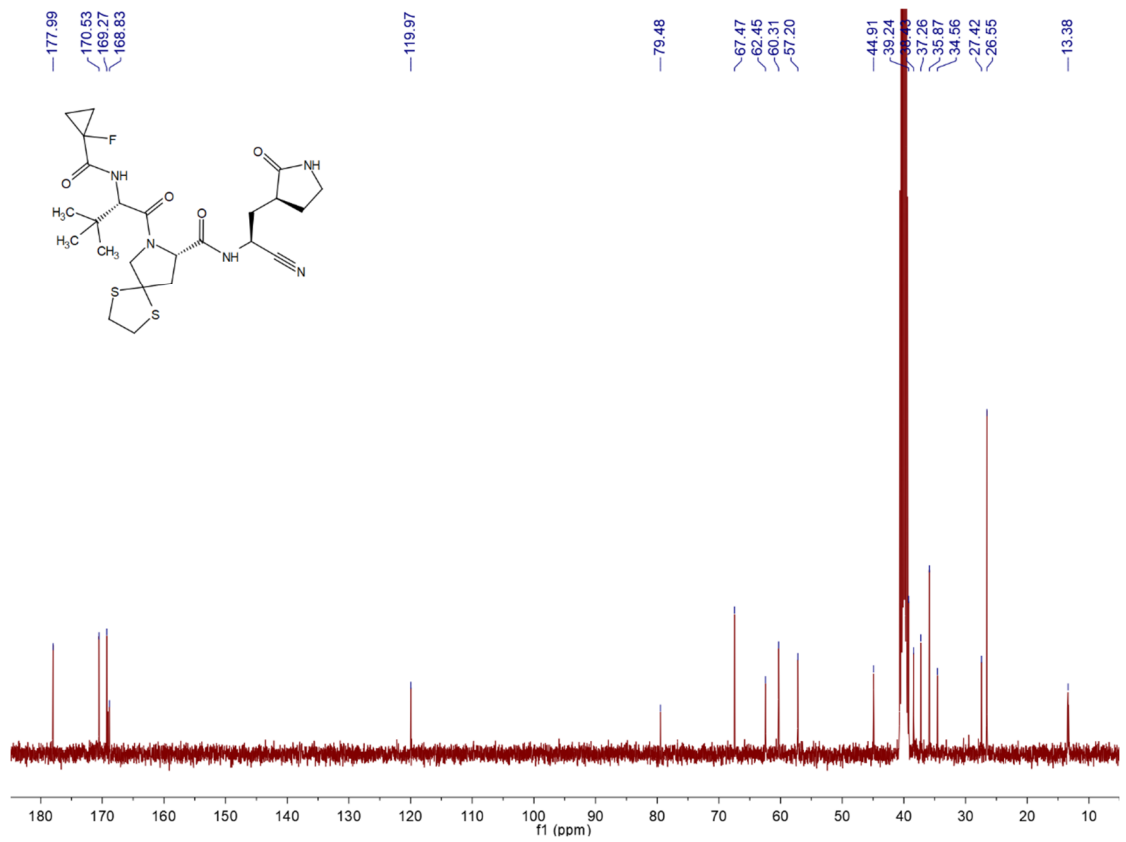

<sup>13</sup>C NMR of 10

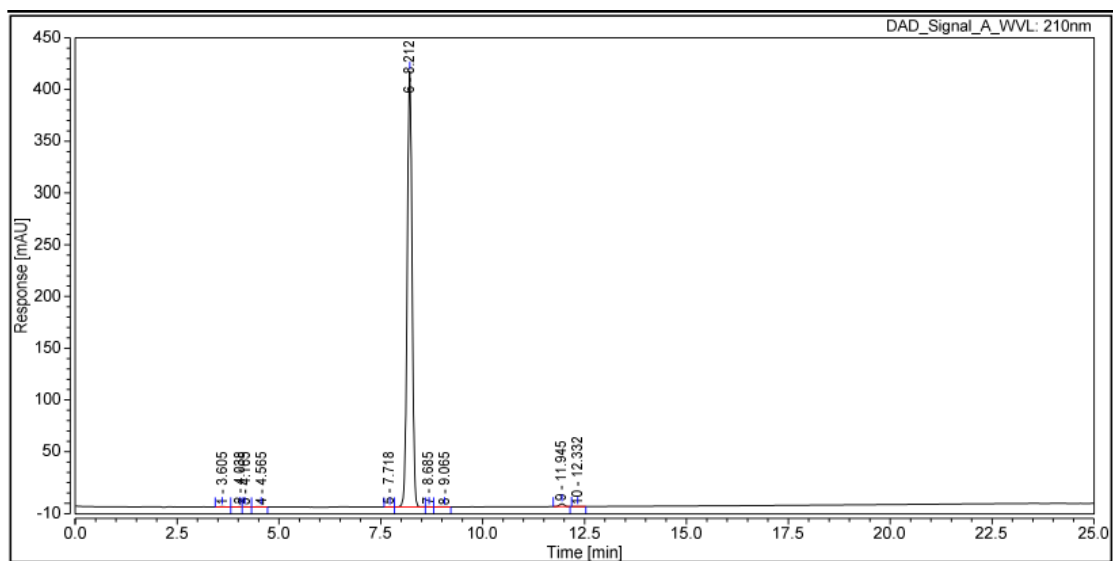

| Integration Results |           |                    |                 |                |                 |                 |                 |
|---------------------|-----------|--------------------|-----------------|----------------|-----------------|-----------------|-----------------|
| No.                 | Peak Name | Retention Time min | Area mAU*s      | Height mAU     | Relative Area % | S/N             | Resolution (EP) |
| 1                   |           | 3.605              | 2.52023         | 0.342          | 0.0713          | 47.5            | n.a.            |
| 2                   |           | 4.038              | 1.61428         | 0.228          | 0.0457          | 31.6            | n.a.            |
| 3                   |           | 4.165              | 1.83096         | 0.249          | 0.0518          | 34.5            | n.a.            |
| 4                   |           | 4.565              | 2.55389         | 0.263          | 0.0723          | 36.5            | 16.91           |
| 5                   |           | 7.718              | 1.47299         | 0.206          | 0.0417          | 28.6            | 2.45            |
| 6                   |           | 8.212              | 3494.88507      | 421.225        | 98.9301         | 58430.4         | n.a.            |
| 7                   |           | 8.685              | 1.56266         | 0.206          | 0.0442          | 28.6            | n.a.            |
| 8                   |           | 9.065              | 2.93702         | 0.246          | 0.0831          | 34.2            | 10.17           |
| 9                   |           | 11.945             | 22.44616        | 2.803          | 0.6354          | 388.8           | 1.95            |
| 10                  |           | 12.332             | 0.85793         | 0.110          | 0.0243          | 15.3            | n.a.            |
| <b>Total:</b>       |           |                    | <b>3532.681</b> | <b>425.879</b> | <b>100.0000</b> | <b>59075.95</b> |                 |

### HPLC of 10

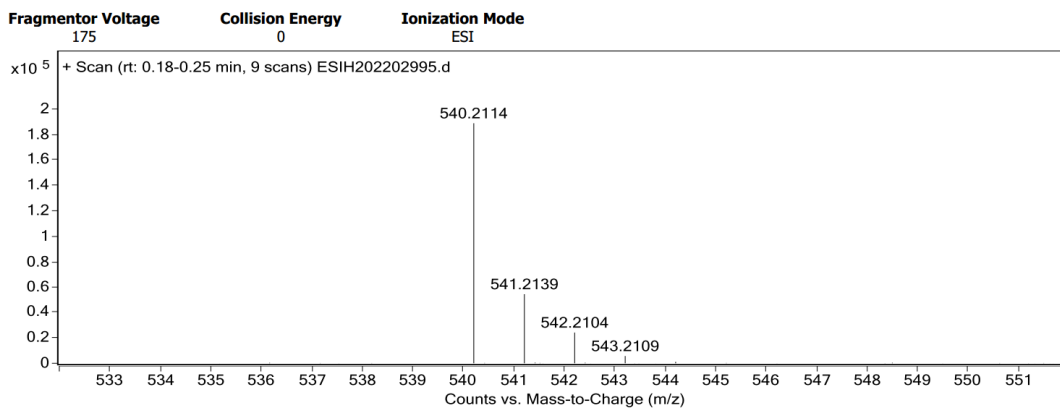

| Formula Calculator Results |          |            |            |                                                                               |                    |
|----------------------------|----------|------------|------------|-------------------------------------------------------------------------------|--------------------|
| m/z                        | Calc m/z | Diff (mDa) | Diff (ppm) | Ion Formula                                                                   | Ion                |
| 540.2114                   | 540.2109 | -0.48      | -0.89      | C <sub>24</sub> H <sub>35</sub> F <sub>N5</sub> O <sub>4</sub> S <sub>2</sub> | (M+H) <sup>+</sup> |

--- End Of Report ---

### HRMS of 10

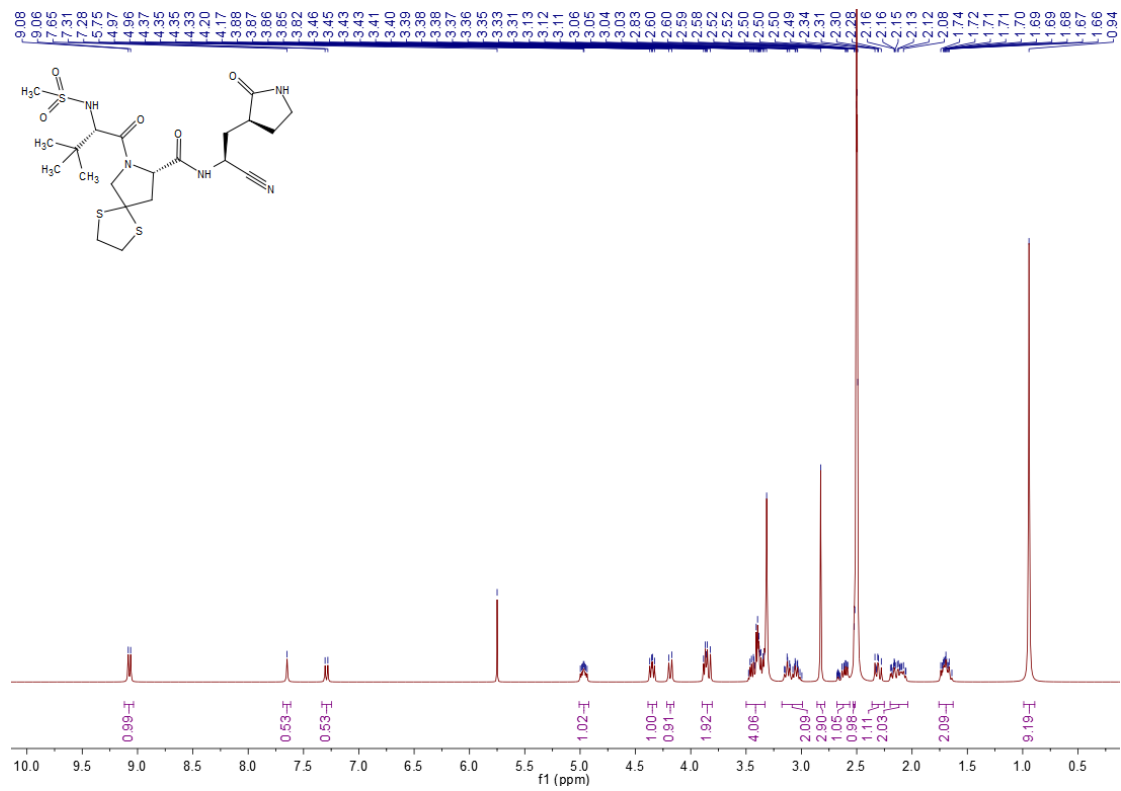

$^1\text{H}$  NMR of **11**

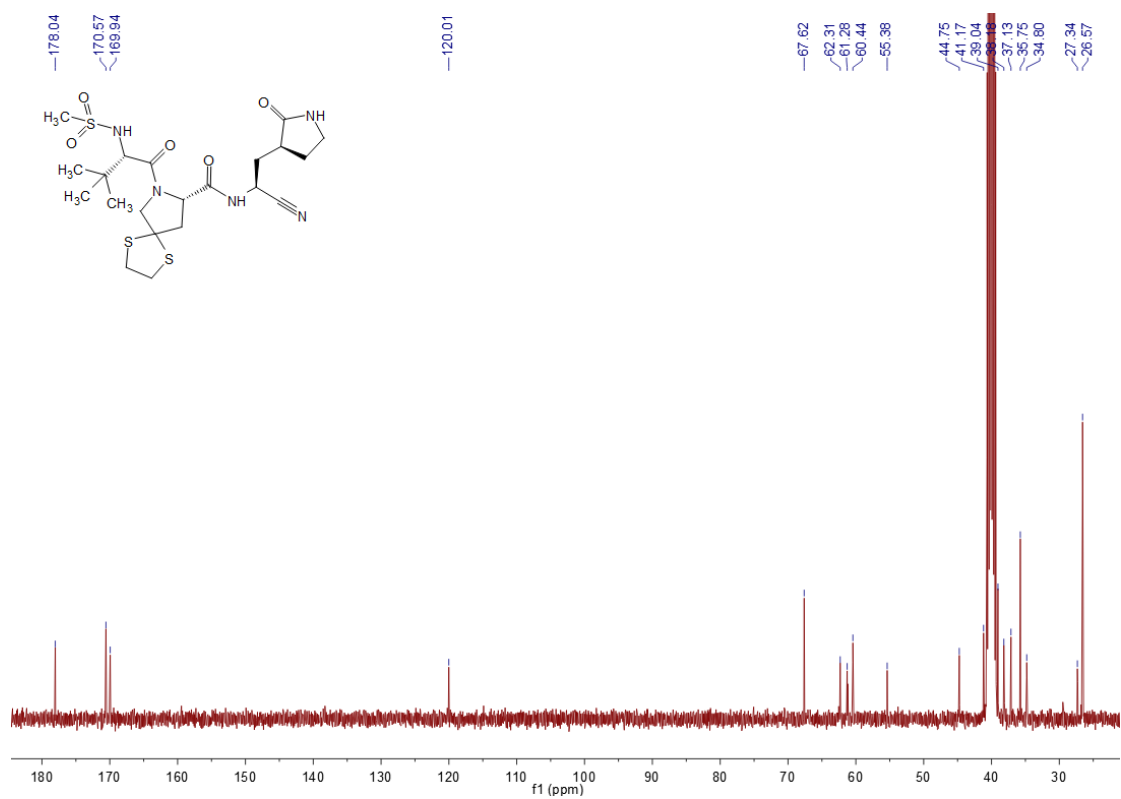

$^{13}\text{C}$  NMR of **11**



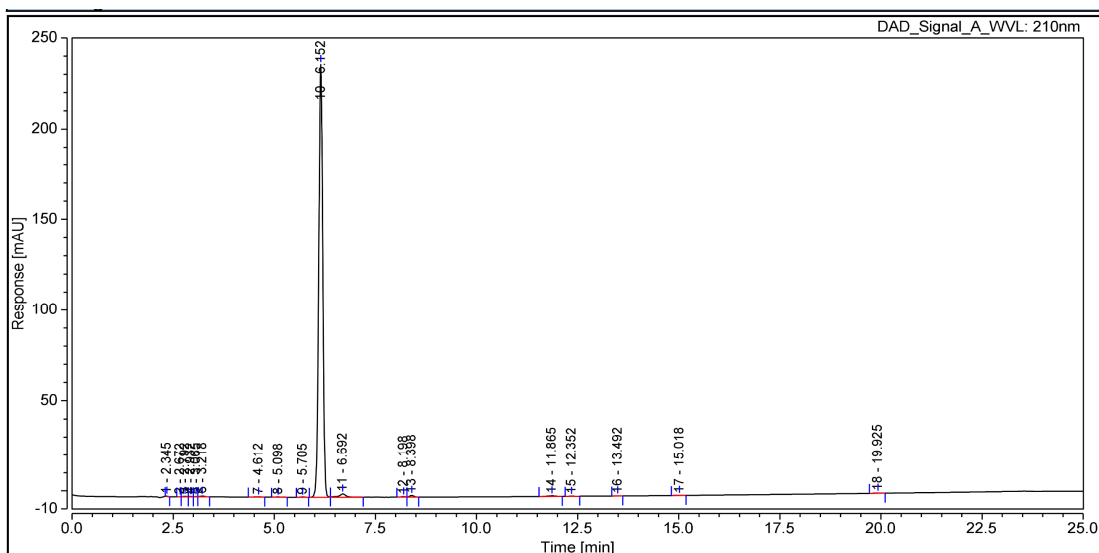

| Integration Results |           |                       |                 |                |                    |                 |                 |
|---------------------|-----------|-----------------------|-----------------|----------------|--------------------|-----------------|-----------------|
| No.                 | Peak Name | Retention Time<br>min | Area<br>mAU*s   | Height<br>mAU  | Relative Area<br>% | S/N             | Resolution (EP) |
| 1                   |           | 2.345                 | 0.91009         | 0.300          | 0.0537             | 33.0            | n.a.            |
| 2                   |           | 2.672                 | 0.36653         | 0.092          | 0.0216             | 10.2            | n.a.            |
| 3                   |           | 2.792                 | 2.21101         | 0.377          | 0.1304             | 41.5            | 1.08            |
| 4                   |           | 2.932                 | 1.02245         | 0.257          | 0.0603             | 28.3            | 1.12            |
| 5                   |           | 3.065                 | 0.86020         | 0.200          | 0.0507             | 22.1            | 0.91            |
| 6                   |           | 3.218                 | 3.11457         | 0.404          | 0.1837             | 44.5            | 6.15            |
| 7                   |           | 4.612                 | 2.03991         | 0.205          | 0.1203             | 22.5            | 1.87            |
| 8                   |           | 5.098                 | 1.55163         | 0.170          | 0.0915             | 18.7            | 2.69            |
| 9                   |           | 5.705                 | 1.20697         | 0.183          | 0.0712             | 20.2            | 2.50            |
| 10                  |           | 6.152                 | 1642.46894      | 239.063        | 96.8762            | 26308.1         | 2.51            |
| 11                  |           | 6.692                 | 22.04923        | 1.845          | 1.3005             | 203.0           | n.a.            |
| 12                  |           | 8.198                 | 2.08549         | 0.267          | 0.1230             | 29.4            | n.a.            |
| 13                  |           | 8.398                 | 7.35665         | 0.997          | 0.4339             | 109.7           | 13.43           |
| 14                  |           | 11.865                | 5.04408         | 0.406          | 0.2975             | 44.7            | 1.78            |
| 15                  |           | 12.352                | 0.67387         | 0.076          | 0.0397             | 8.4             | 5.42            |
| 16                  |           | 13.492                | 0.79269         | 0.108          | 0.0468             | 11.9            | 7.19            |
| 17                  |           | 15.018                | 0.70648         | 0.076          | 0.0417             | 8.4             | 20.34           |
| 18                  |           | 19.925                | 0.97027         | 0.099          | 0.0572             | 10.8            | n.a.            |
| <b>Total:</b>       |           |                       | <b>1695.431</b> | <b>245.125</b> | <b>100.0000</b>    | <b>26975.27</b> |                 |

### HPLC of 11

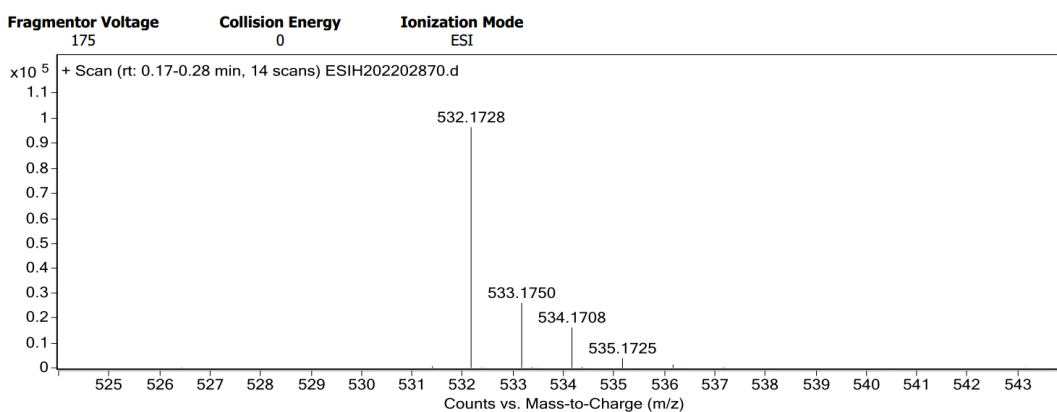

#### Formula Calculator Results

| m/z      | Calc m/z | Diff (mDa) | Diff (ppm) | Ion Formula      | Ion    |
|----------|----------|------------|------------|------------------|--------|
| 532.1728 | 532.1717 | -1.12      | -2.1       | C21 H34 N5 O5 S3 | (M+H)+ |

--- End Of Report ---

### HRMS of 11

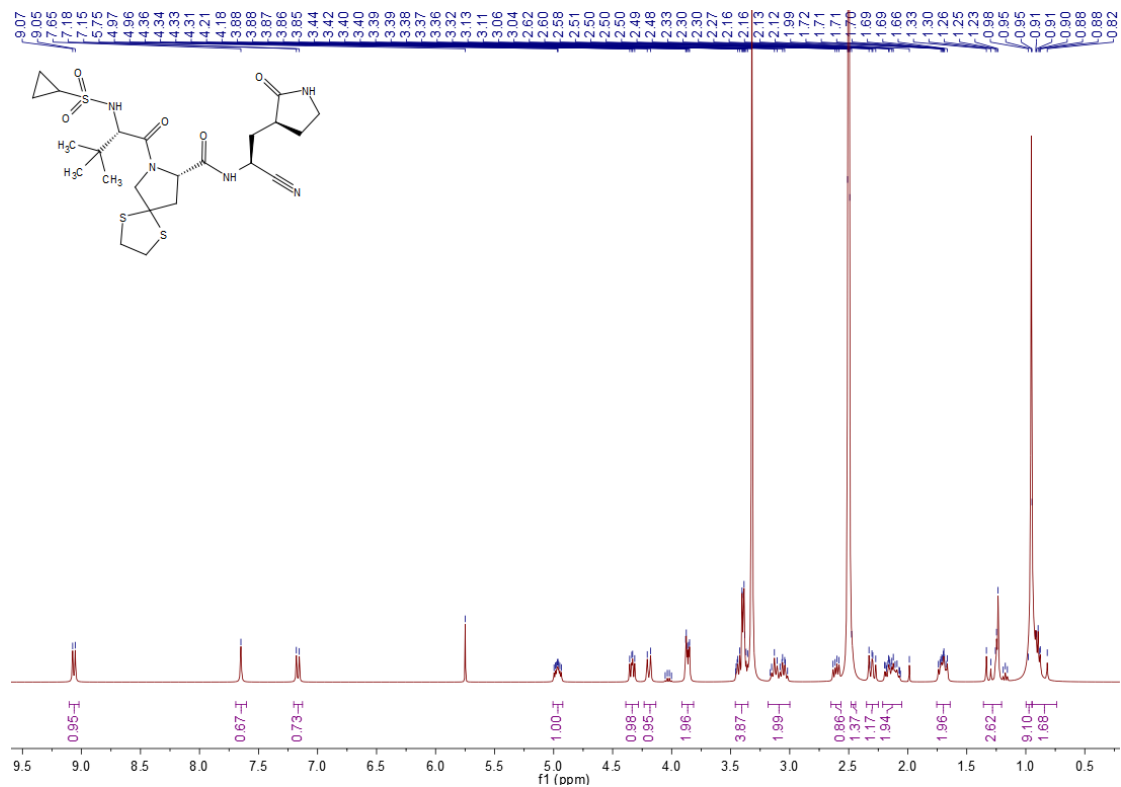

<sup>1</sup>H NMR of 12

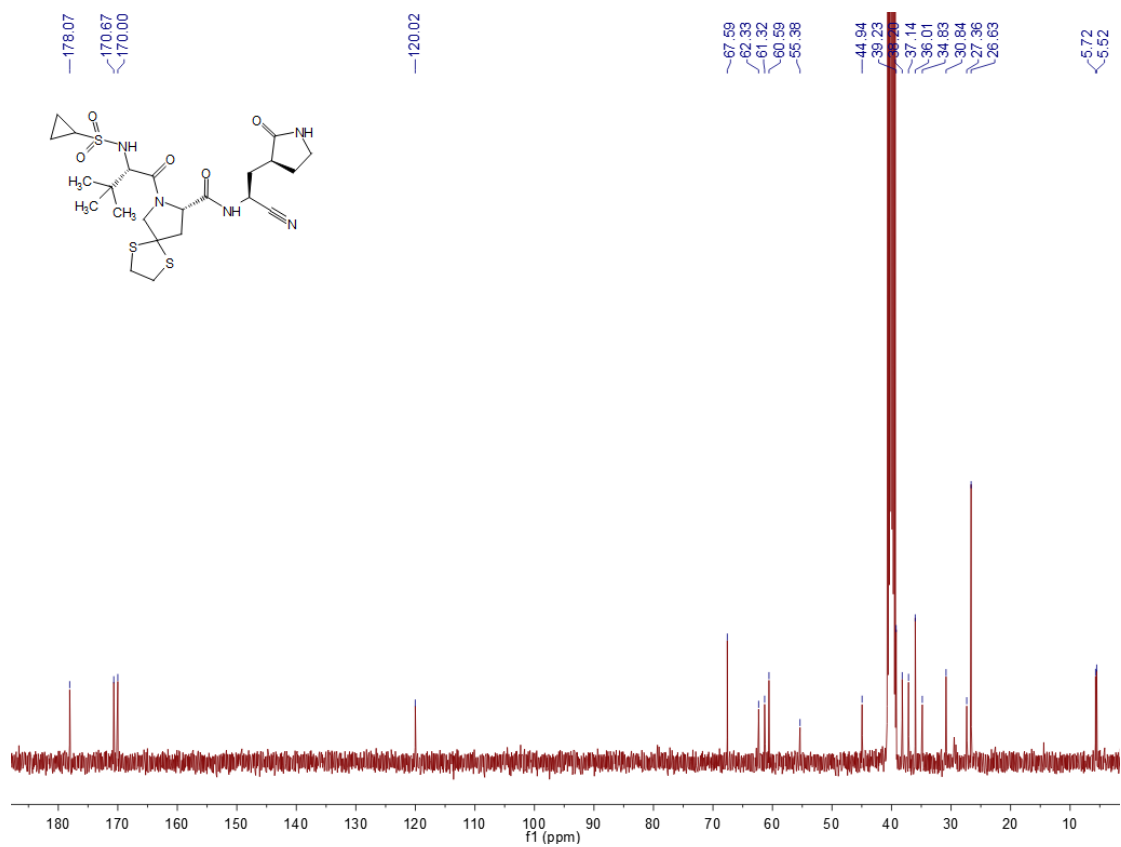

<sup>13</sup>C NMR of 12

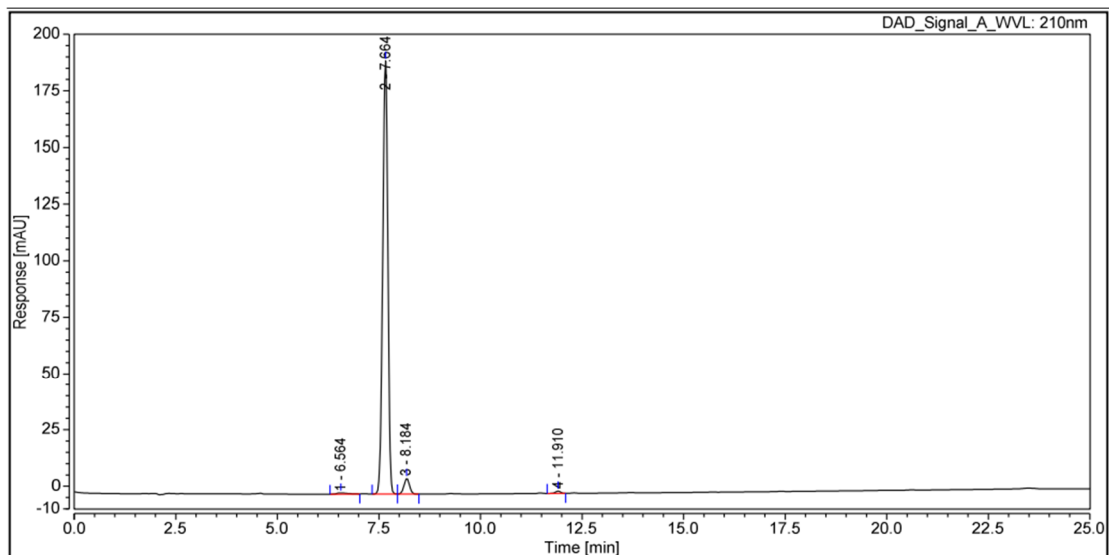

| Integration Results |           |                       |                 |                |                    |                 |                 |
|---------------------|-----------|-----------------------|-----------------|----------------|--------------------|-----------------|-----------------|
| No.                 | Peak Name | Retention Time<br>min | Area<br>mAU*s   | Height<br>mAU  | Relative Area<br>% | S/N             | Resolution (EP) |
| 1                   |           | 6.564                 | 10.71959        | 0.531          | 0.6050             | 72.6            | 2.84            |
| 2                   |           | 7.664                 | 1685.78626      | 191.668        | 95.1505            | 26230.9         | 2.14            |
| 3                   |           | 8.184                 | 66.10621        | 6.892          | 3.7312             | 943.2           | 15.50           |
| 4                   |           | 11.910                | 9.09376         | 1.034          | 0.5133             | 141.6           | n.a.            |
| <b>Total:</b>       |           |                       | <b>1771.706</b> | <b>200.125</b> | <b>100.0000</b>    | <b>27388.28</b> |                 |

### HPLC of 12

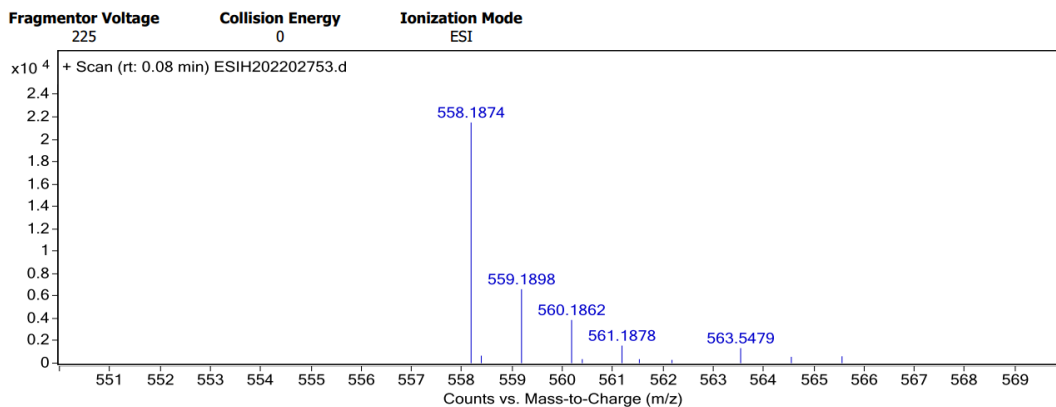

#### Formula Calculator Results

| m/z      | Calc m/z | Diff (mDa) | Diff (ppm) | Ion Formula      | Ion    |
|----------|----------|------------|------------|------------------|--------|
| 558.1874 | 558.1873 | -0.06      | -0.11      | C23 H36 N5 O5 S3 | (M+H)+ |

--- End Of Report ---

### HRMS of 12
